1 **A small molecule drug screening identifies colistin sulfate as an enhancer of Natural Killer**  
2 **cell cytotoxicity.**

3 Serena Cortés-Kaplan<sup>1,2,3</sup>, Mohammed S. Hasim<sup>1,2,3</sup>, Shelby Kaczmarek<sup>2,3</sup>, Zaid Taha<sup>1,2,3</sup>, Glib  
4 Maznyi<sup>1,2,3</sup>, Scott McComb<sup>2,3,4</sup>, Seung-Hwan Lee<sup>2,3</sup>, Jean-Simon Diallo<sup>1,2,3</sup>, Michele Ardolino<sup>1,2,3</sup>

5

6 1: Cancer Therapeutics Program, Ottawa Hospital Research Institute, Ottawa, ON

7 2: CI3, University of Ottawa, Ottawa, ON

8 3: Department of Biochemistry, Microbiology and Immunology, University of Ottawa, Ottawa,

9 ON

10 4: Human Health Therapeutics Research Centre, National Research Council, Canada

11

12 \* Correspondence:

13 Michele Ardolino

14 501 Smyth Road, Cancer Center, 3-328, Ottawa, ON, K1H 8M2

15 [m.ardolino@uottawa.ca](mailto:m.ardolino@uottawa.ca)

16 Tel: +1-613-737-8899 ext 77257

17

18 **Abstract:**

19 Because of their crucial role in tumor immunity, NK cells have quickly become a prime target for  
20 immunotherapies, with adoptive transfer of NK cells and the use of NK cell engagers quickly  
21 moving to clinical stage. On the other hand, only few studies have focused on small molecule  
22 drugs capable of unleashing NK cell against cancer. In this context, repurposing small molecule is  
23 an attractive strategy to identify new immunotherapies from already approved drugs. Here, we  
24 screened 1,200 FDA-approved drugs from the Prestwick Chemical Library, to identify compounds  
25 that increase NK cell cytotoxic potential. Using a high-throughput luciferase-release cytotoxicity  
26 assay, we found that the antibiotic colistin sulfate increased cytotoxicity of human NK cells  
27 towards cancer cells. The effect of colistin was short lived and was not observed when NK cells  
28 were pretreated with the drug, showing how NK cell activity was potentiated only when the  
29 compound was present at the time of recognition of cancer cells. Further studies are needed to  
30 uncover the mechanism of action and the pre-clinical efficacy of colistin sulfate in mouse cancer  
31 models.

32

33 **Keywords:**

34 NK cells, immunotherapy, functional screen, drug repurposing

## 35 **Introduction**

36 Seminal studies from the 1990s and early 2000s highlighted the importance of the immune system  
37 in tumor biology through processes such as immunosurveillance and immunoediting<sup>1</sup>, which in  
38 turn led to the most recent advances in cancer therapeutics: immunotherapies. Cancer  
39 immunotherapy is an encompassing term referring to therapeutic strategies that target components  
40 of the immune system to enhance clearance of the malignant cells. Various categories of  
41 immunotherapies exist<sup>2</sup> and, encouragingly, some became first-line treatments in some cancer  
42 types<sup>3,4</sup>. As the field of immunotherapy continues to develop, we have gained a better  
43 understanding of how immune cells contribute to immunotherapy efficacy, for instance Natural  
44 Killer (NK) cells. NK cells are innate lymphoid cells that play a crucial role in tumor surveillance  
45 and clearance<sup>5</sup>. The importance of NK cells in immunosurveillance is appreciated from the  
46 observation that mice without functional NK cells show impaired tumor control<sup>6,7</sup> and that patients  
47 with defective or decreased frequency of NK cells are at greater risk of developing malignancies,  
48 specifically virally induced cancers<sup>8,9</sup>. Recently, a thorough systematic review and meta-analysis  
49 encompassing 15 solid cancer types found that NK cell infiltration in solid tumors was associated  
50 with improved overall survival<sup>10</sup>, whereas lower low frequency of circulating or tumor-infiltrating  
51 NK cells or NK cells that display impaired function are associated with worse prognosis in several  
52 cancer types<sup>11-14</sup>. NK cells can either be administered for adoptive cell therapy or can be directly  
53 targeted to enhance their anti-tumor activity<sup>5</sup>. Within the second category, small molecule drugs  
54 have been surprisingly overlooked, despite evidence that small molecules can potentiate NK  
55 anti-cancer functions<sup>15,16</sup>. In addition to enhancing cytotoxicity, small molecules can also be used  
56 to promote proliferation and maturation in expansion protocols for NK cells that are used for  
57 adoptive cell therapies<sup>15</sup>. Small molecule immunotherapies are advantageous as they are orally

58 bioavailable, usually cost less than biological immunotherapies, can target both extracellular and  
59 intracellular components and have a greater ability to penetrate through physiological barriers<sup>17</sup>.  
60 However, from small molecule identification to development of a lead drug compound, the clinical  
61 drug pipeline can take years if not decades before the drug sees use in the clinic. For this reason,  
62 drug repurposing is an attractive alternative that identifies new indications for previously approved  
63 drugs. Repurposed drugs already have a safety and efficacy profile associated with them which  
64 makes this a favorable route. Several studies have conducted high-throughput drug screenings to  
65 identify drugs that modulate NK cell activity. These studies utilized commercially available  
66 libraries containing repurposed drugs<sup>18-20</sup> or natural compound libraries<sup>21,22</sup> and have identified  
67 small molecules that were not previously known to modulate NK cell activity. Here, we screened  
68 the Prestwick Chemical Library for compounds capable of enhancing cytotoxicity of human NK  
69 cells towards leukemia target cells and identified the antibiotic colistin sulfate as an enhancer of  
70 NK cell cytotoxicity.

71

## 72 **Materials and Methods.**

### 73 *Cell culture*

74 All cell lines were cultured in a humidified incubator at 37°C and 5% CO<sub>2</sub> in media supplemented  
75 with 100 U/ml penicillin (Gibco, CA), 100 µg/ml streptomycin (Gibco), 10 g/ml gentamycin  
76 sulfate (Gibco), 20 mM HEPES (Fisher, ON). NK92 cells were cultured in RPMI-1640 containing  
77 10% fetal bovine serum (FBS) (Gibco). K562-NL cells were cultured in RPMI-1640 containing  
78 5% FBS. A375-NL cells and 786O-NL cells were cultured in DMEM (Corning, VA) containing  
79 10% FBS.

80

81 *Reagents and drugs*

82 Preparation of coelenterazine substrate: 500 µg of coelenterazine substrate (CTZ) (Gold  
83 Biotechnology, MO) was reconstituted in 610 µL of 100% ethanol and 6.2 µL of 12 N hydrochloric  
84 acid. The reconstituted substrate was protected from light and stored at -80°C until use. Prior to  
85 measuring luciferase activity, the reconstituted CTZ was mixed with 1X salt buffer (45 mM  
86 EDTA, 30 mM sodium pyrophosphate, 1.425 M NaCl) at a 1:200 dilution (5 µL CTZ per 1 mL  
87 salt buffer).

88

89 The Prestwick Chemical Library (<https://www.prestwickchemical.com>) was kindly provided by  
90 Dr. Diallo.

91

92 Preparation of candidate drugs: colistin sulfate salt (Sigma-Aldrich, MO), nicotinamide  
93 (Sigma-Aldrich), monensin sodium salt (Sigma-Aldrich), zafirlukast (Sigma-Aldrich), tizanidine  
94 hydrochloride (Sigma-Aldrich), closantel (Sigma-Aldrich), benazepril hydrochloride  
95 (Sigma-Aldrich), and diflorasone diacetate (Sigma-Aldrich) were prepared at a master stock  
96 concentration of 1 mM in 100% DMSO, with exception of colistin sulfate salt which was dissolved  
97 in water. A working stock concentration was prepared for all candidate drugs of 100 µM in PBS  
98 with a final DMSO concentration of 10%. All candidate drugs were stored at -20°C until use.

99 Fluorochrome-conjugated antibodies, all from BD Biosciences, CA: AF647-CD3 (Clone  
100 UCHT-1), APC-R700-CD4 (Clone RPA-T4), BV786-CD8 (Clone RPA-T8), PE-CD56 (Clone  
101 B159), BV711-CD16 (Clone 3G8), BV650-CD19 (Clone SJ25-C1) and PerCP-Cy5.5-CD14  
102 (Clone MφP9).

103 *Generation of cell lines*

104 To generate K562, A375 and 78O cells expressing nanoluciferase, lentiviral particles were  
105 produced by co-transfecting 293T cells with a lentiviral plasmid encoding nano luciferase plenti-  
106 NL (a gift from Dr. Wanker through Addgene; <http://n2t.net/addgene:113450> ; RRID:Addgene  
107 #113450), packaging plasmids pCMV-dR8.2dvpr (a gift from Dr. Weinberg through Addgene;  
108 <http://n2t.net/addgene:8455> ; RRID:Addgene #8455) and pCMV-VSV-G (a gift from Dr.  
109 Weinberg through Addgene; <http://n2t.net/addgene:8454> ; RRID:Addgene\_8454), following  
110 Lipofectamine 3000 transfection instructions for a 10 cm dish (Invitrogen, CA). 72 hours following  
111 the transfection, supernatant containing lentiviral particles was collected and used to transduce  
112 K562, A375 and 786O-NL cells by spin-infection (500 g for 2 hours at 37°C) with 8 µg/mL  
113 polybrene (Sigma-Aldrich). Four days post-transduction, nano luciferase expression was  
114 confirmed by using the Nano-glo luciferase assay system (Promega, WI). After nano luciferase  
115 expression was confirmed, single cells from the transduced cell populations were sorted into five  
116 96-well plates using the MoFlow XDP Cell Sorter (Beckman Coulter, CA). After several weeks  
117 of culture, wells with cell growth were tested for luciferase expression. Selected clones were mixed  
118 at an equal ratio to make a polyclonal population.

119

120 *Luciferase release-based cytotoxicity assay*

121 NK92 cells were co-cultured with target cells expressing NL in triplicate at various E:T  
122 (effector:target) ratios in RPMI 5% FBS in 96-well V bottom plates (Sarstedt, QC) for 5 hours at  
123 37°C. After the incubation, 50 µL of supernatant from each well was transferred to round-bottom  
124 black 96-well plates (Corning, ME). Depending on the experiment, either 25 µL of Nano-glo  
125 substrate or CTZ substrate was added to each well and the Biotek Synergy Mx plate reader (Biotek,

126 VT) was used to measure luminescence. Percentage (%) specific lysis was calculated using the  
127 following equation (Equation 1), where experimental release are the raw luminescence values from  
128 NK92+target cells, spontaneous release are the raw luminescence values from the target cells in  
129 absence of effector cells, and maximal release are the raw luminescent values from target cells  
130 treated with 30 µg/mL of digitonin (Sigma-Aldrich).

131 
$$\% \text{ specific lysis} = \frac{(\text{experimental release} - \text{spontaneous release})}{(\text{maximal release} - \text{spontaneous release})} \times 100 \text{ (Equation 1)}$$

132

### 133 *Flow cytometry-based cytotoxicity assays*

134 Flow cytometry-based cytotoxicity assay was performed as described before<sup>23</sup>. Briefly, NK92 cells  
135 were co-cultured with CFSE-labelled targets cells in triplicate at various E:T ratios with 10,000  
136 target cells per well in RPMI 5% FBS in 96-well V bottom plate (Sarstedt) for 5 hours at 37°C.  
137 Cells were then stained with Zombie NIR™ Fixable Viability Kit (Biolegend, CA). Prior to  
138 acquisition, APC counting beads (Spherotech, IL) were added. Samples were acquired using the  
139 HTS function of the LSR Fortessa (BD Biosciences). Percentage specific lysis was calculated  
140 using Equation 1, where experimental release is the ratio of beads to live target cells from  
141 NK92+target cell wells, spontaneous release is the ratio of beads to live target cells from the target  
142 cells in absence of effector cells wells, and for maximal release, the value 0 was used as we would  
143 expect there to be no live cells.

144

### 145 *Screening of the Prestwick Chemical Library and plate configuration*

146 The Prestwick Chemical Library, which contains 1,200 regulatory-approved drugs, was screened  
147 to identify compounds capable of enhancing NK92 cytotoxicity. K562-NL cells alone or a

148 co-culture of NK92+K562-NL cells at a E:T ratio of 1 were treated with 10  $\mu$ M of each drug for  
149 5-hours at 37°C. Each compound was evaluated in singlet over 2 independent experiments.

150  
151 The Prestwick Chemical Library's 15 stock plates were stored at -20°C in 10% DMSO at a  
152 concentration of 100  $\mu$ M in deep well plates (Axygen, Tamaulipas, Mexico), with compounds only  
153 in columns 2-11. On the day of the screen, the stock plates were thawed, and the Bravo Automated  
154 Liquid Handling Platform (Agilent, CA) was used to dispense 10  $\mu$ L of each drug (final drug  
155 concentration of 10  $\mu$ M) to columns 2-11 to a total of thirty 96-well V-bottom assay plates  
156 (Sarstedt). For the 15 assay plates containing K562-NL cells alone, 45  $\mu$ L of K562-NL cells plus  
157 45  $\mu$ L of media was dispensed to all columns for a final assay volume of 100  $\mu$ L. For the 15 assay  
158 plates containing K562-NL+NK92 cells, 45  $\mu$ L of K562-NL was dispensed to all columns and 45  
159  $\mu$ L of NK92 cells was dispensed from column 1-11 for a final assay volume of 100  $\mu$ L. Controls  
160 were dispensed in column 1 and 12 for each assay plate. For all 30 assay plates, 10  $\mu$ L of 10%  
161 DMSO was dispensed to column 1 (final DMSO concentration of 1%). For the 15 assay plates  
162 containing K562-NL cells alone, 10  $\mu$ L of 300  $\mu$ g/mL of digitonin was dispensed to column 12  
163 (final concentration of 30  $\mu$ g/mL) as a maximal release control. For the 15 assay plates containing  
164 K562-NL+NK92 cells, NK92 and K562-NL cells were dispensed at a 9:1 E:T ratio in column 12  
165 as a positive control for NK92 cytotoxicity. Negative controls in column 1 were K562-NL+DMSO  
166 (K562-NL alone plates) and 1:1 E:T+DMSO (NK92+K562-NL plates). Plate layouts is depicted  
167 in Supplementary Fig. 1.

168



169 After the incubation, 50  $\mu$ L of supernatant from each assay plate was transferred to round-bottom  
170 black 96-well plates (Corning, ME) using the Bravo Automated Liquid Handling Platform. Biotek  
171 plate reader was used to dispense 25  $\mu$ L of CTZ to each well and measure luminescence.

172

### 173 *Z' factor, fold-change and normalization analysis*

174 Raw luminescence values from the screenings were used to calculate Z'-factor and luminescent  
175 fold-change. To evaluate the overall screening assay stability, Z' factor was calculated for each  
176 assay plate using the negative (column 1: DMSO) and positive (column 12: 9:1 E:T or digitonin)  
177 control values in each plate. Equation 2 was used to calculate Z' factor, where  $SD^+$  represents the  
178 standard deviation of the positive control,  $SD^-$  represent the standard deviation of the negative  
179 control,  $m^+$  represents the mean of the positive control and  $m^-$  represents the mean of the negative  
180 control.

$$181 \quad Z' = 1 - \frac{3SD^+ + 3SD^-}{|m^+ - m^-|} \quad (\text{Equation 2})$$

182 To identify compounds capable of enhancing NK92 cytotoxicity, the luminescent fold-change over  
183 DMSO control was calculated for all compounds in the E:T=1 condition and K562-NL alone  
184 condition. Compounds that had a fold-change  $\geq 1.3$  were considered drug hits. Drugs were  
185 excluded if the fold-change was  $\geq 1.3$  in the K562-NL alone treated with drugs condition.  
186 Fold-change for each plate was calculated by using the controls on individual plates.

187

188 *Dose-response experiments*

189 K562-NL cells alone or NK92 and K562-NL cells mixed at a 1:1 and 3:1 E:T ratio were treated  
190 with either 0, 1, 5, 10 and 20  $\mu$ M of drug candidates for 5 hours at 37°C. Luciferase activity was  
191 measured as previously described.

192

193 *Colistin sulfate pre-treatment*

194 NK92 or K562-NL cells alone were treated for either 24 hours or 1 hour with 10  $\mu$ M of colistin  
195 sulfate. Prior to mixing the cells together, the drug was washed out. Pre-treated NK92 cells were  
196 mixed with untreated K562-NL cells, and pre-treated K562-NL cells were mixed with untreated  
197 NK92 cells. A condition where drug treatment was present during the 5-hour incubation was also  
198 included. Luciferase activity was measured as previously described.

199

200 *Human PBMC isolation*

201 Human blood samples were obtained from healthy donors using the Perioperative Human Blood  
202 and Tissue Specimen Collection Program protocol approved by The Ottawa Health Science  
203 Network Research Ethics Board (OHSN - REB 2011884-01H). PBMCs were isolated from  
204 peripheral blood of healthy donors by Ficoll (GE Healthcare, Sweden) gradient centrifugation at  
205 19°C. Cells were resuspended in CryoStor® CS10 and cryopreservation of cells was followed  
206 according to the manufacturer's instructions (BioLife Solutions, WA).

207

## 208 *Human NK cell cytotoxicity assays with colistin treatment*

209 Previously frozen human PBMCs from healthy donors were thawed according to CryoStor® CS10  
210 thawing cells protocol (BioLife Solutions), afterwards, PBMCs were kept overnight at 4°C. NK  
211 cells were isolated from PBMCs using EasySep™ Human NK Cell Isolation Kit (Stemcell  
212 Technologies, BC). NK cells were co-cultured with K562-NL cells at different E:T ratios and  
213 treated with 10 µM of colistin for 5 hours at 37°C. Luciferase activity was measured as previously  
214 described.

215

## 216 *Statistical analysis*

217 Statistical analyses conducted included unpaired two-tailed Student's t test, one or two-way  
218 ANOVA with either Dunnett's, Sidak, Tukey's or Bonferroni's multiple comparison test, as  
219 described in the figure captions. Statistical significance was achieved when the  $p$  value was  $\leq 0.05$ .  
220 GraphPad Prism 9 was used for statistical analyses. For flow cytometry experiments, FlowJo  
221 V.10.7.1 was used for analysis.

222

## 223 **Results**

### 224 *Generation of K562-NL and validation of a luciferase release-based killing assay*

225 Traditional methods to assess NK cell cytotoxicity such as chromium-release or flow  
226 cytometry-based assays are difficult to scale up for a high-throughput use. Luciferase release-based  
227 killing assays have proven useful to perform drug screenings<sup>24</sup>, and a luciferase released-based  
228 screen was employed in a previous NK cell drug screening<sup>18</sup>. To generate target cells suitable for  
229 a luciferase release-based NK cell killing assay, we transduced the myeloid leukemia cell line  
230 K562 with a lentiviral plasmid encoding nano luciferase (NL). Expression of NL was assessed on

231 transduced K562 cells by exposing cellular lysates to the substrate: no signal was observed from  
232 the lysate of control cells, whereas a robust signal was detected from the lysate of transduced K562  
233 cells (Sup. Fig. 2A). Once we verified NL expression on K562 cells, we employed K562-NL as  
234 targets in a luciferase release-based killing assays using the NK cell line NK92 as effectors.  
235 Consistent with what expected in cytotoxicity assays, the presence of effector cells increased the  
236 luminescence signal in a dose-dependent manner, indicating that the target cells were effectively  
237 killed, whereas the luminescence signal observed with target cells alone was similar to that of the  
238 media only (Fig. 1A).

239  
240 Next, we sought to obtain a polyclonal population of K562 cells expressing NL from the  
241 transduced population, which likely contained cells which were not transduced. Therefore, we  
242 sorted single cells into five 96-well plates and tested wells where cell growth was observed for  
243 luciferase expression. K562 clones expressing NL were then tested in cytotoxicity assay vis-à-vis  
244 with the unsorted K562-NL population (Sup Fig. 2B). Clones that were killed by NK92 cells  
245 similarly to the K562 bulk population were selected and mixed at an equal ratio to make a  
246 polyclonal population of K562-NL cells, which was then used in all subsequent experiments.

247

#### 248 ***Optimization of the conditions for a high-throughput luciferase release-based cytotoxicity assay***

249 For these first experiments, to test NL activity, we used furimazine (FMZ), the optimized substrate  
250 for NL<sup>25</sup>. However, using furimazine in a high-throughput setting is not feasible due to the high  
251 cost of the substrate. Therefore, we explored if the less expensive substrate coelenterazine (CTZ),  
252 widely used for *Renilla* and *Gaussia* luciferase, could be used as an alternative. After conducting  
253 a luciferase release-based cytotoxicity assay, we used either FMZ or CTZ to assess NL activity

254 side-by-side. Luminescent signal was detected with both substrates, although the magnitude of  
255 luminescence was higher using FMZ (Fig. 1B). However, the dynamic range between targets only  
256 and the E:T ratio of 1 was comparable between the two substrates, and CTZ maintained the same  
257 dose-response observed using FMZ, indicating that CTZ could effectively replace FMZ as a  
258 substrate for these experiments.

259

260 Next, we set to determine the ideal E:T ratio to use for the drug screening. We conducted several  
261 luciferase release-based cytotoxicity assays that included a range of E:T ratios and chose to use a  
262 E:T ratio of 1 as this ratio shows minimal killing but still has detectable luminescence above  
263 K562-NL target cells alone and there is large dynamic range between the 1 and 81 ratios, an E:T  
264 ratio that shows saturation in killing (Fig. 1C).

265

266 As a positive control for the screen, we decided to use the mild detergent digitonin, as we found it  
267 able to effectively lyse targets cells without compromising NL activity (Fig. 1D).

268

269 For these set-up experiments, the supernatant from the luciferase-release cytotoxicity assay was  
270 collected and transferred to a new plate after a centrifugation step, which would be hardly feasible  
271 in high-throughput conditions. Our concern was that by skipping the centrifugation step prior to  
272 collecting the supernatant, we would capture live target cells that would lyse after addition of the  
273 substrate, resulting in similar luminescence detection between target cells alone and  
274 target+effector cells. Therefore, to determine if this step was required, we tested the difference  
275 between directly collecting the assay's supernatant at the end of the cytotoxicity assay with or  
276 without a centrifugation step. To our advantage, the difference between the target cells alone and

277 target+effector cells condition was still retained without the centrifugation step (Fig. 1E). Based  
278 on these results, we deemed that a centrifugation step prior to supernatant collection was  
279 unnecessary and decided to proceed with directly collecting the assay supernatant for the drug  
280 screening.

281  
282 Finally, to optimize the high-throughput drug screening workflow, we needed to estimate if leaving  
283 the effector or target cells at room temperature for an extended amount of time before they were  
284 seeded would affect the results as, logistically, we could not keep cells in their cell culture  
285 conditions (humidified incubator, 37°C, 5% CO<sub>2</sub>) when seeding the drug screening assay plates.  
286 We simulated drug screen plating conditions by incubating NK92 and K562-NL cells separately  
287 at room temperature for 0, 60, 120, 180, and 240 minutes before the cells were seeded into assay  
288 plates. We observed that leaving the cells at room temperature more than 120 minutes before being  
289 seeded into assay plates gradually but substantially decreased NK92 cytotoxicity (Fig. 1F). We  
290 also observed a slight increase in spontaneous lysis in the K562-NL alone condition as time  
291 progressed, shown by the increase in luminescence detection at the last two time points (Fig. 1F).  
292 Based on these results, we concluded that cells had to be seeded within 1-hour to maintain the  
293 dynamic range between the experimental and control conditions.

294  
295 ***Screening of the Prestwick Chemical Library to identify enhancers of NK cell cytotoxicity***

296 To identify compounds that enhanced NK cell cytotoxicity, we employed the Prestwick Chemical  
297 Library. K562-NL cells alone or NK92+K562-NL cells mixed at a E:T ratio of 1 were treated with  
298 10 µM of each drug for 5 hours at 37°C (Fig. 2A). Each compound was evaluated in singlet over  
299 2 biological replicates. To identify compounds that increased NK92 cytotoxicity, the luminescent

300 values of all wells containing drugs were compared to the DMSO control wells from the same  
301 plate and this difference was quantified as fold-change over DMSO control (Fig. 2B). Fold-change  
302 values for all compounds and the list of excluded compounds are listed in Supplemental Tables 1  
303 and 2.

304  
305 Compounds with a fold-change  $\geq 1.3$  were considered to have increased NK cell cytotoxicity. We  
306 identified 87 drugs that had a fold-change  $\geq 1.3$  from the first screening of the Prestwick Chemical  
307 Library and 119 drugs that had a fold-change  $\geq 1.3$  from the second screening. From this list, only  
308 Alexidine dihydrochloride proved to be toxic for target cells even in absence of effectors, and was  
309 therefore not further considered. 14 compounds from the total drugs identified had a fold-change  
310  $\geq 1.3$  on both screening days (Table 1). From these 14 drugs, 8 candidate drugs were selected for  
311 follow-up experiments. Drugs with higher fold-change were prioritized and drugs that were no  
312 longer in use, not available in the North American market or were already known to be enhancers  
313 of NK cytotoxicity were excluded. The 8 candidate drugs and associated fold-change were colistin  
314 sulfate salt (2.02), nicotinamide (1.85), monensin sodium salt (1.62), zafirlukast (1.54), tizanidine  
315 hydrochloride (1.42), closantel (1.41), benazepril hydrochloride (1.40), and diflorasone diacetate  
316 (1.40) (Table 1).

317  
318 To evaluate the overall screening assay stability, Z' factor was calculated for each assay plate from  
319 the screening of the Prestwick Chemical Library. The screening assay had an average Z' factor of  
320 0.72 for K562-NL alone plates treated with drugs and 0.44 for the NK92 + K562-NL (E:T of 1)  
321 plates treated with drugs. A Z' factor close to 0.5 is considered fair and Z' factor 0.5-1 is considered

322 good<sup>26</sup>. Z'-factor for each individual plate can be found in Supplementary Table 3. Z'-factor  
323 analysis suggests that the overall quality of the drug screening was fair.

324

|    | <b>Drug</b>                           | <b>Fold-change</b> | <b>Drug class</b>         |
|----|---------------------------------------|--------------------|---------------------------|
| 1  | Colistin sulfate salt <sup>a,b</sup>  | 2.02               | antibiotic                |
| 2  | Nicotinamide <sup>a</sup>             | 1.85               | vitamin B3                |
| 3  | Monensin sodium salt <sup>a</sup>     | 1.62               | antibiotic                |
| 4  | Butirosin disulfate salt              | 1.60               | aminoglycoside antibiotic |
| 5  | Zafirlukast <sup>a</sup>              | 1.54               | anti-asthmatic            |
| 6  | Amphotericin B                        | 1.50               | antifungal                |
| 7  | Argatroban                            | 1.46               | anti-coagulant            |
| 8  | Dimethisoquin hydrochloride           | 1.45               | anesthetic                |
| 9  | Tizanidine hydrochloride <sup>a</sup> | 1.42               | adrenergic agonist        |
| 10 | Closantel <sup>a</sup>                | 1.41               | anti-parasitic            |
| 11 | Benazepril hydrochloride <sup>a</sup> | 1.40               | ACE inhibitor             |
| 12 | Diflorasone diacetate <sup>a</sup>    | 1.40               | topical steroid           |
| 13 | Butoconazole nitrate                  | 1.38               | anti-fungal               |
| 14 | Etretinate                            | 1.34               | retinoid                  |

325 **Table 1. Compounds identified as enhancers of NK92 cytotoxicity from screening the Prestwick**  
326 **Chemical Library.** Listed drugs had a luminescent fold-change  $\geq 1.3$  on both screening days. Drug class  
327 for each compound is listed. <sup>a</sup>Candidate drugs that were selected for further investigation. <sup>b</sup>Fold-change of  
328 single screening.

329



330 ***Validation of candidate drugs***

331 Initial validation of the 8 candidate drugs was conducted by performing cytotoxicity assays  
332 following the drug screening experimental conditions (E:T ratio of 1 and drug concentration of 10  
333  $\mu\text{M}$ ). Of the eight drugs we tested, only colistin sulfate salt (herein colistin) increased NK cell  
334 cytotoxicity (Fig. 3A), whereas the other 7 drugs did not change, or even reduced, the ability of  
335 NK cells to kill target cells (Fig. 3B-H).

336

337 Validation was expanded over two E:T ratio (1 and 3) and over a wider range of drug concentration  
338 (1-20  $\mu\text{M}$ ). Colistin was effective starting from 5  $\mu\text{M}$  at both E:T ratios (Fig. 4A), and increased  
339 cytotoxicity even at lower E:T ratios (Fig. 5). In contrast, the other compounds failed to elicit NK  
340 cell cytotoxicity in the tested conditions (Fig. 4B-H), indicating they were likely false positives.  
341 Taken together, these results corroborate that colistin sulfate enhances the cytotoxic activity of  
342 NK92 cells against K562 leukemia cells.

343

344 ***Colistin sulfate failed to potentiate NK cell killing of non-hematopoietic cancer cell lines.***

345 K562 are widely used to study NK cell cytotoxicity due to their high susceptibility to NK  
346 recognition and killing. Given the promising results obtained with colistin, we tested if this  
347 compound would also increase NK-mediated killing of more resistant cell lines. For these studies,  
348 we employed the melanoma cell line A375 and the renal adenocarcinoma cell line 786O, both  
349 transduced with NL. Whereas killing of K562 was potentiated by drug treatment, neither A375 nor  
350 786O cells were killed more effectively in the presence of colistin sulfate (Fig. 6), indicating that  
351 the compound failed to generally boost NK cell cytotoxicity.

352

353 ***The effect of colistin sulfate on NK cells is short lived.***

354 To gather insights on the mechanisms underlying colistin-enhanced NK cell killing, we pre-treated  
355 NK92 cells with the drug for 24 hours and then employed them as effectors in killing assays. NK92  
356 cells were pre-treated with 0, 1, 5 or 10  $\mu$ M of colistin and, prior to incubation with K562-NL cells,  
357 the drug was washed out. Consistent with the results of our screening, colistin was not toxic  
358 towards NK92 cells (Fig. 7A). However, NK92 cells pre-treated with colistin failed to kill target  
359 cells more effectively than the control, whereas, consistent with what described above, colistin  
360 increased NK-mediated killing when present during the co-culture (Fig. 7B).

361

362 Considering that NK92 cells pre-treated for 24-hour with colistin did not present increased  
363 cytotoxicity, we tested if shorter pre-incubations could be more effective. NK92 cells were treated  
364 with 10  $\mu$ M of colistin for 1 hour, and the drug was washed out prior to co-culture with K562-NL  
365 cells. In comparison to the untreated condition, 1-hour pre-treatment of NK92 cells with colistin  
366 slightly but consistently increased NK92 cytotoxicity (Fig. 7C). On the other hand, pre-treatment  
367 of K562 cells did not increase NK cell killing (Fig. 7D), suggesting that colistin sulfate, rather than  
368 sensitizing the target cells, acted on NK cells, but in a short-lived fashion.

369

370 ***Colistin sulfate increases cytotoxicity of primary human NK cells.***

371 Lastly, we tested if colistin treatment increased cytotoxicity of primary NK cells. We obtained  
372 PBMCs from healthy donor blood and isolated NK cells by negative selection. NK cell purity was  
373 ~85% and both CD56<sup>+</sup>CD16<sup>-</sup> and CD56<sup>+</sup>CD16<sup>+</sup> NK cell populations were present (not shown).  
374 After NK cells were isolated from PBMCs, they were immediately co-cultured with K562-NL  
375 cells at varying E:T ratios and treated with 10  $\mu$ M of colistin for 5 hours. Pooled results from all 3

376 healthy donor are shown in Fig. 8. Consistent with the results obtained using NK92 cells, primary  
377 NK cells treated with colistin showed an increased cytotoxicity towards K562-NL.

378

379 Overall, this screen of the Prestwick Chemical Library identified colistin as a potential enhancer  
380 of NK cell cytotoxicity towards some cell types. The effect of colistin sulfate was short-lived but  
381 was observed in both NK92 and primary human NK cells.

382

## 383 **Discussion and Conclusions**

384 Here, we conducted a high-throughput luciferase release-based cytotoxicity assay to screen the  
385 Prestwick Chemical Library and identify compounds that increased NK cell cytotoxicity.  
386 Luciferase-release assays have been used in previous a NK cell drug screening with success<sup>18</sup>. The  
387 results of that screening identified small molecule inhibitors of NK cell cytotoxicity; however no  
388 small molecule enhancers were identified. To our knowledge, this is the first drug screening to  
389 employ a luciferase-release cytotoxicity assay format that identified small molecules capable of  
390 increasing NK cell cytotoxicity. Overall, the quality of our screening assay was fair, as determined  
391 by the Z' factor. One problem we faced was that the dynamic range between the <1:1 E:T DMSO  
392 negative control> and <9:1 E:T positive control> in the 1:1 E:T plates decreased overtime, which  
393 is most likely due to decreased cytotoxicity of NK92 cells as time progressed. In preparation for  
394 the screen, we realized that cells kept at room temperature for more than 2-hours prior to co-  
395 culture for the cytotoxicity assay showed decreased cytotoxicity and therefore separated the screen  
396 in two days. However, the signal of the <9:1 E:T positive control> began to overlap with the signal  
397 of the <1:1 E:T DMSO control> and as a result reduced the Z' factor. To improve future  
398 screenings, a strategy to maintain a low the signal-to-noise ratio overtime will be needed. Another  
399 limitation of the drug screening was that, due to COVID19-related shortage of plastic material,  
400 each compound was only tested in 2 biological replicates, which prevented us to perform a more  
401 robust statistical analysis of our results.

402  
403 However, even in light of these limitations, the screening identified compounds previously  
404 reported to enhance NK cell activity, including amphotericin B<sup>19</sup>. We also identified nicotinamide,  
405 which is currently under investigation in clinical trials as a supportive agent for ex vivo expansion

406 of primary NK cells for the treatment of Non-Hodgkin lymphoma and multiple myeloma<sup>27</sup>.  
407 Interestingly, nicotinamide failed to be validated in follow up experiments at the tested  
408 concentrations. On the other hand, two compounds identified in previous screens, naftifine and  
409 butenafine<sup>20</sup>, were not highlighted in our screening (fold-change 0.84 and 1.14, respectively). Also,  
410 we identified monensin, a known inhibitor of NK cell degranulation as an enhancer of NK92  
411 cytotoxicity. As expected, upon further tests, monensin was shown to decrease NK92 cytotoxicity  
412 in a dose-dependent manner.

413  
414 From the 8 candidate drugs identified from screening of the Prestwick Chemical Library, colistin  
415 was the only drug that increased NK cell cytotoxicity in validation experiments. Colistin, also  
416 known as polymyxin E, is an antibiotic derived from *Bacillus polymyxa* and is used to treat  
417 antibiotic-resistant infections<sup>28</sup>. Colistin is an amphipathic molecule that disrupts the membrane of  
418 Gram-negative bacteria by displacing calcium and magnesium ions<sup>28</sup>. This ultimately leads to  
419 increased cell permeability and eventually cell death. Few studies have investigated how colistin  
420 modulates immune cells, let alone NK cells. One study found that colistin increased cytotoxicity  
421 of murine splenic NK cells towards YAC-1 target cells and increased production of IFN- $\gamma$ <sup>29</sup>.  
422 Although no mechanism was provided, it was shown that both polycationic peptide and  
423 hydrophobic tail domains were needed for the observed effect<sup>29</sup>. Colistin was also shown to  
424 increase NK cytotoxicity in combination with the antibiotics daptomycin or teicoplanin in mouse  
425 model of multi-resistant *Acinetobacter baumannii* infection, and this combination showed a  
426 greater increase in NK cytotoxicity than either antibiotic on its own<sup>30</sup>. Colistin was previously  
427 identified in a Prestwick Chemical Library screen as a compound capable of enhancing p38/MAPK  
428 pathway, a key pathway in innate immunity that is induced from TLR signaling<sup>31,32</sup>. Subsequently,

429 this group showed that colistin increased phagocytosis, cytokine secretion and phosphorylation of  
430 p38 in rat macrophages and KEGG pathway analysis of treated macrophages showed upregulation  
431 of genes involved in signal transduction, immune pathways and calcium signaling<sup>33</sup>. Interestingly,  
432 colistin induced upregulation of genes downstream of the MAPK and PI3K-Akt pathways<sup>33</sup> in  
433 conditions similar to those of our screen. The MAPK and PI3K-Akt pathways are implicated in  
434 downstream signaling of NK activating receptors<sup>34</sup>, suggesting a potential mechanism for colistin  
435 increasing NK cytotoxicity. Altogether, these highlighted studies illustrate that colistin has  
436 potential immunomodulatory properties beyond its bactericidal activity.

437

438 The fact that the effect of colistin was short-lived and evidence that some drugs disrupting  
439 membrane integrity have been shown to increase exocytosis of lytic granules of NK cells<sup>20</sup>,  
440 suggests that colistin facilitated granule exocytosis in NK cells. However, if this was the  
441 mechanism of action, we would expect that colistin would increase NK cell-mediated killing  
442 towards all tested target cell lines, which was not the case. Therefore, the mechanism of action of  
443 colistin remains to be elucidated.

444

445 In conclusion, we first optimized a luciferase release-based NK cell cytotoxicity assay for a  
446 high-throughput format. Using this assay format, we screened the Prestwick Chemical Library for  
447 small molecules that had the ability to increase NK cell cytotoxicity and identified colistin sulfate  
448 salt as an enhancer of NK cell cytotoxicity.

#### 449 **Acknowledgements**

450 We thank members of the Ardolino lab for critically reading the manuscript and Dr. Auer for  
451 facilitating PBMC collection. This study was funded by the Canadian Institutes of Health Research

452 (to MA), by CIHR, Terry Fox Research Institute, Canadian Cancer Society supported by the Lotte  
453 & John Hecht Memorial Foundation (to JSD) and by the National Research Council Canada  
454 Disruptive Technology Solutions Cell and Gene Therapy challenge program (to SMC).

455

#### 456 **Author contributions.**

457 Author contributions are detailed according to CRediT criteria.

| Author | Conceptualization | Formal analysis | Funding acquisition | Investigation | Methodology | Resources | Supervision | Visualization | Writing - original draft | Writing review - & editing |
|--------|-------------------|-----------------|---------------------|---------------|-------------|-----------|-------------|---------------|--------------------------|----------------------------|
| SCK    | X                 | X               |                     | X             | X           |           |             | X             | X                        | X                          |
| MSH    |                   |                 |                     | X             |             |           |             |               |                          | X                          |
| SK     |                   |                 |                     | X             |             |           |             |               |                          | X                          |
| ZT     |                   |                 |                     | X             |             | X         |             |               |                          | X                          |
| GM     |                   |                 |                     | X             |             | X         |             |               |                          | X                          |
| SMC    |                   |                 |                     |               |             | X         |             |               |                          | X                          |
| SL     |                   |                 |                     |               |             | X         |             |               |                          | X                          |
| JSD    | X                 |                 | X                   |               |             | X         | X           |               |                          | X                          |
| MA     | X                 | X               | X                   |               |             |           | X           | X             | X                        | X                          |

458

459

460 **Conflicts of interest:** JSD is an inventor on patents licensed to Turnstone Biologics, which is  
461 commercializing oncolytic Maraba virus. JSD has patents licensed and also holds equity in Virica  
462 Biotech, which is developing oncolytic virus platforms. MA has a consulting agreement with Alloy  
463 Therapeutics and a sponsored research agreement with Dragonfly Therapeutics and Actym  
464 Therapeutics.

465

#### 466 **References**

- 467 1 Vesely, M. D., Kershaw, M. H., Schreiber, R. D. & Smyth, M. J. Natural innate and adaptive  
468 immunity to cancer. *Annu Rev Immunol* **29**, 235-271, doi:10.1146/annurev-immunol-031210-  
469 101324 (2011).
- 470 2 Zhang, Y. & Zhang, Z. The history and advances in cancer immunotherapy: understanding the  
471 characteristics of tumor-infiltrating immune cells and their therapeutic implications. *Cellular &*  
472 *molecular immunology* **17**, 807-821, doi:10.1038/s41423-020-0488-6 (2020).
- 473 3 Voelker, R. Immunotherapy Is Now First-line Therapy for Some Colorectal Cancers. *JAMA* **324**,  
474 433, doi:10.1001/jama.2020.13299 (2020).
- 475 4 Martinez, P., Peters, S., Stammers, T. & Soria, J. C. Immunotherapy for the First-Line Treatment  
476 of Patients with Metastatic Non-Small Cell Lung Cancer. *Clinical cancer research : an official*  
477 *journal of the American Association for Cancer Research* **25**, 2691-2698, doi:10.1158/1078-  
478 0432.CCR-18-3904 (2019).
- 479 5 Hodgins, J. J., Khan, S. T., Park, M. M., Auer, R. C. & Ardolino, M. Killers 2.0: NK cell therapies at  
480 the forefront of cancer control. *J Clin Invest* **129**, 3499-3510, doi:10.1172/JCI129338 (2019).
- 481 6 Kim, S., Iizuka, K., Aguila, H. L., Weissman, I. L. & Yokoyama, W. M. In vivo natural killer cell  
482 activities revealed by natural killer cell-deficient mice. *Proc Natl Acad Sci U S A* **97**, 2731-2736,  
483 doi:10.1073/pnas.050588297 (2000).
- 484 7 Smyth, M. J. *et al.* Perforin is a major contributor to NK cell control of tumor metastasis. *J*  
485 *Immunol* **162**, 6658-6662 (1999).
- 486 8 Moon, W. Y. & Powis, S. J. Does Natural Killer Cell Deficiency (NKD) Increase the Risk of Cancer?  
487 NKD May Increase the Risk of Some Virus Induced Cancer. *Front Immunol* **10**, 1703,  
488 doi:10.3389/fimmu.2019.01703 (2019).
- 489 9 Orange, J. S. Natural killer cell deficiency. *J Allergy Clin Immunol* **132**, 515-525,  
490 doi:10.1016/j.jaci.2013.07.020 (2013).
- 491 10 Nersesian, S. *et al.* NK cell infiltration is associated with improved overall survival in solid  
492 cancers: A systematic review and meta-analysis. *Transl Oncol* **14**, 100930,  
493 doi:10.1016/j.tranon.2020.100930 (2021).
- 494 11 Wang, W. T. *et al.* Elevated absolute NK cell counts in peripheral blood predict good prognosis in  
495 chronic lymphocytic leukemia. *J Cancer Res Clin Oncol* **144**, 449-457, doi:10.1007/s00432-017-  
496 2568-2 (2018).
- 497 12 Lim, S. A. *et al.* Defective Localization With Impaired Tumor Cytotoxicity Contributes to the  
498 Immune Escape of NK Cells in Pancreatic Cancer Patients. *Front Immunol* **10**, 496,  
499 doi:10.3389/fimmu.2019.00496 (2019).
- 500 13 Jun, E. *et al.* Progressive Impairment of NK Cell Cytotoxic Degranulation Is Associated With TGF-  
501  $\beta$ 1 Deregulation and Disease Progression in Pancreatic Cancer. *Front Immunol* **10**, 1354,  
502 doi:10.3389/fimmu.2019.01354 (2019).
- 503 14 Liu, Y. *et al.* Increased expression of programmed cell death protein 1 on NK cells inhibits NK-  
504 cell-mediated anti-tumor function and indicates poor prognosis in digestive cancers. *Oncogene*  
505 **36**, 6143-6153, doi:10.1038/onc.2017.209 (2017).
- 506 15 Kerr, W. G. & Chisholm, J. D. The Next Generation of Immunotherapy for Cancer: Small  
507 Molecules Could Make Big Waves. *J Immunol* **202**, 11-19, doi:10.4049/jimmunol.1800991  
508 (2019).
- 509 16 Nicolai, C. J. *et al.* NK cells mediate clearance of CD8(+) T cell-resistant tumors in response to  
510 STING agonists. *Sci Immunol* **5**, doi:10.1126/sciimmunol.aaz2738 (2020).
- 511 17 Zhu, H. F. & Li, Y. Small-Molecule Targets in Tumor Immunotherapy. *Nat Prod Bioprospect* **8**,  
512 297-301, doi:10.1007/s13659-018-0177-7 (2018).



- 513 18 Hayek, S. *et al.* Identification of Primary Natural Killer Cell Modulators by Chemical Library  
514 Screening with a Luciferase-Based Functional Assay. *SLAS Discov* **24**, 25-37,  
515 doi:10.1177/2472555218797078 (2019).
- 516 19 Kim, N., Choi, J. W., Park, H. R., Kim, I. & Kim, H. S. Amphotericin B, an Anti-Fungal Medication,  
517 Directly Increases the Cytotoxicity of NK Cells. *Int J Mol Sci* **18**, doi:10.3390/ijms18061262  
518 (2017).
- 519 20 Theorell, J. *et al.* Immunomodulatory activity of commonly used drugs on Fc-receptor-mediated  
520 human natural killer cell activation. *Cancer Immunol Immunother* **63**, 627-641,  
521 doi:10.1007/s00262-014-1539-6 (2014).
- 522 21 Gong, C. *et al.* A High-Throughput Assay for Screening of Natural Products that Enhanced  
523 Tumoricidal Activity of NK Cells. *Biol Proced Online* **17**, 12, doi:10.1186/s12575-015-0026-6  
524 (2015).
- 525 22 Xu, Z. *et al.* A high-throughput assay for screening natural products that boost NK cell-mediated  
526 killing of cancer cells. *Pharm Biol* **58**, 357-366, doi:10.1080/13880209.2020.1748661 (2020).
- 527 23 Hsu, J. *et al.* Contribution of NK cells to immunotherapy mediated by PD-1/PD-L1 blockade. *J Clin*  
528 *Invest* **128**, 4654-4668, doi:10.1172/JCI99317 (2018).
- 529 24 Matta, H. *et al.* Development and characterization of a novel luciferase based cytotoxicity assay.  
530 *Sci Rep* **8**, 199, doi:10.1038/s41598-017-18606-1 (2018).
- 531 25 England, C. G., Ehlerding, E. B. & Cai, W. NanoLuc: A Small Luciferase Is Brightening Up the Field  
532 of Bioluminescence. *Bioconjug Chem* **27**, 1175-1187, doi:10.1021/acs.bioconjchem.6b00112  
533 (2016).
- 534 26 Zhang, J. H., Chung, T. D. & Oldenburg, K. R. A Simple Statistical Parameter for Use in Evaluation  
535 and Validation of High Throughput Screening Assays. *J Biomol Screen* **4**, 67-73,  
536 doi:10.1177/108705719900400206 (1999).
- 537 27 Bachanova, V. *et al.* Vol. 25 S175-S176 (Biology of Blood and Marrow Transplantation, Biology  
538 of Blood and Marrow Transplantation, 2019).
- 539 28 Conly, J. & Johnston, B. Colistin: the phoenix arises. *Can J Infect Dis Med Microbiol* **17**, 267-269,  
540 doi:10.1155/2006/901873 (2006).
- 541 29 Zhong, M., Kadota, Y., Shimizu, Y. & Gohda, E. Induction of cytolytic activity and interferon-  
542 gamma production in murine natural killer cells by polymyxins B and E. *Int Immunopharmacol* **8**,  
543 508-513, doi:10.1016/j.intimp.2007.11.001 (2008).
- 544 30 Cirioni, O. *et al.* Colistin enhances therapeutic efficacy of daptomycin or teicoplanin in a murine  
545 model of multiresistant *Acinetobacter baumannii* sepsis. *Diagn Microbiol Infect Dis* **86**, 392-398,  
546 doi:10.1016/j.diagmicrobio.2016.09.010 (2016).
- 547 31 Cai, Y., Cao, X. & Aballay, A. Whole-animal chemical screen identifies colistin as a new  
548 immunomodulator that targets conserved pathways. *mBio* **5**, doi:10.1128/mBio.01235-14  
549 (2014).
- 550 32 Peroval, M. Y., Boyd, A. C., Young, J. R. & Smith, A. L. A critical role for MAPK signalling pathways  
551 in the transcriptional regulation of toll like receptors. *PLoS One* **8**, e51243,  
552 doi:10.1371/journal.pone.0051243 (2013).
- 553 33 Wang, J. *et al.* Immunomodulatory Effects of Colistin on Macrophages in Rats by Activating the  
554 p38/MAPK Pathway. *Front Pharmacol* **10**, 729, doi:10.3389/fphar.2019.00729 (2019).
- 555 34 Chen, Y., Lu, D., Churov, A. & Fu, R. Research Progress on NK Cell Receptors and Their Signaling  
556 Pathways. *Mediators Inflamm* **2020**, 6437057, doi:10.1155/2020/6437057 (2020).

557

558 **Figure Legends**

559

560 **Figure 1. Optimization of a luciferase release-based cytotoxicity assay for a high-throughput**  
561 **screen.**

562 NK92 cells were co-cultured with K562-NL cells at the indicated E:T ratios for 5-hrs at 37°C.

563 After incubation, the supernatant was collected, the indicated substrate added, and luminescence

564 read by Biotek Synergy microplate reader. **A.** Luciferase-release cytotoxicity assay using

565 transduced K562-NL cells (bulk population, unsorted). 20,000 K562-NL targets per well. After

566 the incubation, luciferase activity was measured using Promega Nano-glo luciferase assay system.

567 Mean +/- SD of three technical replicates. **B.** After the incubation, luciferase activity was measured

568 after addition of either Promega Nano-glo luciferase assay system (FMZ) or CTZ substrate. 10,000

569 K562-NL targets per well. Mean +/- SD of three technical replicates. Representative of 3 biological

570 replicates. **C.** Luciferase-release cytotoxicity assay using 10,000 K562-NL cells. After the

571 incubation, luciferase activity was tested after addition of CTZ. Mean +/- SD of three technical

572 replicates. Graph is representative of 2 biological replicates. **D.** K562-NL cells were treated with

573 30 µg/mL digitonin and compared to K562-NL cells co-cultured at a E:T ratio of 27. 10,000

574 K562-NL cells per well. Luciferase activity was tested after addition of CTZ. Mean +/- SD of three

575 technical replicates. Representative of 2 biological replicates. **E.** Supernatant from a cytotoxicity

576 assay was either collected directly or collected after a centrifugation step. Three technical

577 replicates are shown. Representative of 2 biological replicates. **F.** NK92 or K562-NL cells were

578 incubated at room temperature at indicated times (minutes) prior to start a cytotoxicity assay. Mean

579 +/- SD of three technical replicates. Representative of 3 biological replicates.

580

581 **Figure 2. Screening of the Prestwick Chemical Library.**

582 **A.** Schematic workflow of the Prestwick Chemical Library screening. **B.** Average luminescent  
583 fold-change over DMSO control of all 1,200 compounds from NK92+K562-NL condition are  
584 plotted. The screening was conducted in singlet, over two biological replicates. The dotted red line  
585 indicates 1.3-fold-change. Compounds with a luminescent fold-change over DMSO control  $\geq 1.3$   
586 were considered enhancers of NK92 cytotoxicity. Points represent the average fold-change of n=2  
587 biological replicates, except points 321-400 and 481-560 which represent fold-change from one  
588 replicate.

589

590 **Figure 3. Colistin sulfate salt increases NK92 cytotoxicity against K562-NL.**

591 NK92 and K562-NL cells were seeded into 96-well V bottom plates containing identified drug  
592 hits (10  $\mu$ M) from the Prestwick Chemical Library at a E:T ratio of 1, with 10,000 K562-NL cells  
593 per well, for 5-hrs at 37°C. After the incubation, the supernatant was collected and transferred to  
594 96-well black plates. **A.** Colistin sulfate salt. **B.** Nicotinamide. **C.** Diflorasone diacetate. **D.**  
595 Closantel. **E.** Benazepril hydrochloride. **F.** Tizanidine hydrochloride. **G.** monensin sodium salt. **H.**  
596 Zafirlukast. Mean +/- SD of n=2. Unpaired two-tailed Student's t test. ns= not significant, \*\*:   
597 p<0.01

598

599 **Figure 4. Colistin sulfate salt increases NK92 cytotoxicity against K562-NL.**

600 NK92 and K562-NL cells were seeded into a 96-well V bottom plate at a 1:1 or 3:1 E:T ratio with  
601 10,000 K562-NL cells per well and treated with 1, 5, 10 and 20  $\mu$ M of the indicated drug for 5-hrs  
602 at 37°C. After the incubation, the supernatant was collected and transferred to a 96-well black  
603 plate. **A.** Colistin sulfate salt. **B.** Nicotinamide. **C.** Diflorasone diacetate. **D.** Closantel. **E.**

604 Benazepril hydrochloride. **F.** Tizanidine hydrochloride. **G.** monensin sodium salt. **H.** Zafirlukast.  
605 Mean +/- SD of n=2. Two-way ANOVA with Tukey's multiple comparison test. \*\*: p<0.01, \*\*\*:  
606 p<0.001, \*\*\*\*: p<0.0001.

607

608 **Figure 5. Treatment with colistin sulfate increases NK92 cytotoxicity against K562 cells.**

609 NK92 cells were mixed with K562-NL cells and seeded into a 96-well V bottom plate at a 0.3:1,  
610 1:1 and 3:1 E:T ratio with 10,000 K562-NL cells per well and treated with 10 µM of colistin for  
611 5-hrs at 37°C. After the incubation, the supernatant was collected and transferred to a 96-well black  
612 plate. The Biotek Synergy microplate reader was used to dispense CTZ and read luminescence.  
613 Percent specific lysis is depicted. Mean +/- SD of n=2. Statistical analysis with two-way ANOVA.

614

615 **Figure 6. Treatment with Colistin sulfate failed to increase NK92-mediated killing of**  
616 **non-hematopoietic cell lines.**

617 NK92 and K562-NL/A375-NL (**A**) or K562-NL/786O-NL (**B**) cells were seeded into a 96-well V  
618 bottom plate at a 1:1 E:T ratio with 10,000 target cells per well and treated with 10 µM of colistin  
619 for 5-hrs at 37°C. After the incubation, the supernatant was collected and transferred to a 96-well  
620 black plate. The Biotek Synergy microplate reader was used to dispense CTZ and read  
621 luminescence. Percent specific lysis is depicted. Mean +/- SD of n=2. Statistical analysis with  
622 two-tailed Student's t-test. \*\*: p<0.01; \*\*\*\*: p<0.0001.

623

624 **Figure 7. The effect of colistin sulfate on NK cells is short lived.**

625 **A.** Percent viability of NK92 cells by trypan-exclusion dye after 24-h treatment with 0, 1, 5, 10  
626 µM of colistin. **B** NK92 cells were treated for 24-hrs with 0, 1, 5 and 10 µM of colistin. After

627 24-hrs, NK92 cells were washed and co-cultured with 10,000 K562-NL cells at a 1:1 E:T ratio for  
628 5-hrs at 37°C. NK92 cells co-cultured with targets cells and treated with 10 µM of colistin during  
629 the 5-h incubation were also included. After the incubation, the supernatant was collected and  
630 transferred to a 96-well black plate. The Biotek Synergy microplate reader was used to dispense  
631 CTZ and read luminescence. Percent specific lysis is depicted. Mean +/- SD of n=3. One-way  
632 ANOVA with Dunnett's multiple comparison test. \*\*\*\*: p<0.0001. **C.** NK92 cells were treated  
633 for 1-h with 10 µM of colistin. After 1-h, the compound was washed and NK92 cells were co-  
634 cultured with 10,000 K562-NL cells in a 96-well V bottom plate at a 1:1 E:T ratio for 5-hrs at  
635 37°C. NK92 cells co-cultured with targets cells and treated with 10 µM of colistin during the 5-h  
636 incubation were also included. After the incubation, the supernatant was collected and transferred  
637 to a 96-well black plate. The Biotek Synergy microplate reader was used to dispense CTZ and read  
638 luminescence. Percent specific lysis is depicted. Mean +/- SD of n=2. One-way ANOVA with  
639 Tukey's multiple comparison test. ns= not significant, \*: p<0.05, \*\*: p<0.01; \*\*\*\*: p<0.0001. **D.**  
640 NK92 and K562-NL cells were pre-treated separately with 10 µM of colistin. After 1-h, cells were  
641 washed and co-cultured with either treated or untreated cells. Cells were seeded in a 96-well V  
642 bottom plate at a E:T of 1 ratio using 10,000 K562-NL cells per well for 5-hrs at 37°C. NK92 cells  
643 co-cultured with targets cells and treated with 10 µM of colistin during the 5-h incubation were  
644 also included. After the incubation, the supernatant was collected and transferred to a 96-well black  
645 plate. The Biotek Synergy microplate reader was used to dispense CTZ and read luminescence.  
646 Percent specific lysis is depicted. Mean +/- SD of n=2. One-way ANOVA with Tukey's multiple

647 comparison test. Only significant differences between treatments are shown. \*:  $p < 0.05$ ; \*\*\*\*:  
648  $p < 0.0001$ .

649

650 **Figure 8. Colistin sulfate enhances the killing activity of primary human NK cells.**

651 Human NK cells isolated from PBMCs from healthy donors were mixed with K562-NL cells and  
652 were seeded into a 96-well V bottom plate at increasing E:T ratios, with 10,000 K562-NL cells  
653 per well and treated with 10  $\mu\text{M}$  of colistin for 5-hrs at 37°C. After the incubation, the supernatant  
654 was collected and transferred to 96-well black plates. The Biotek Synergy microplate reader was  
655 used to dispense CTZ and read luminescence. Percent specific lysis is shown. Mean +/- SD of n=3  
656 healthy donors. Statistical analysis was conducted with two-way ANOVA.

657

658 **Supplementary Figure 1: layout of the screening plates.**

659

660 **Supplementary Figure 2: generation of K562-NL:** K562 cells were transduced with a  
661 nano- luciferase expressing vector or a control and lysed. Luminescence was assessed (A). (B)  
662 K562-NL cells were sorted as single clones, and used as targets in cytotoxicity assays vis a vis  
663 with unsorted cells.

664

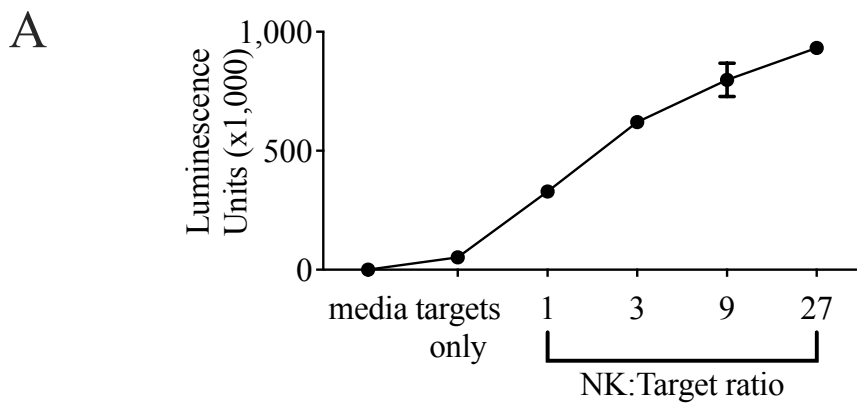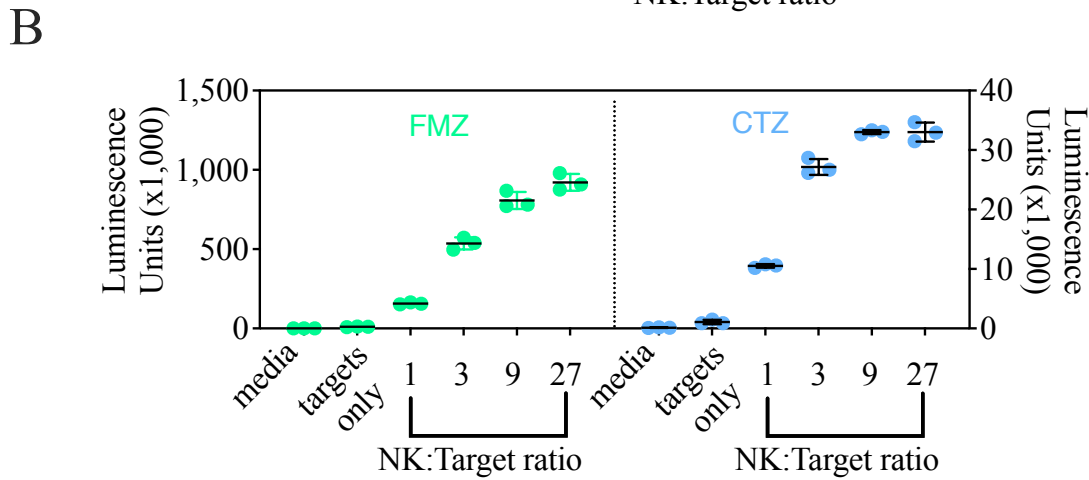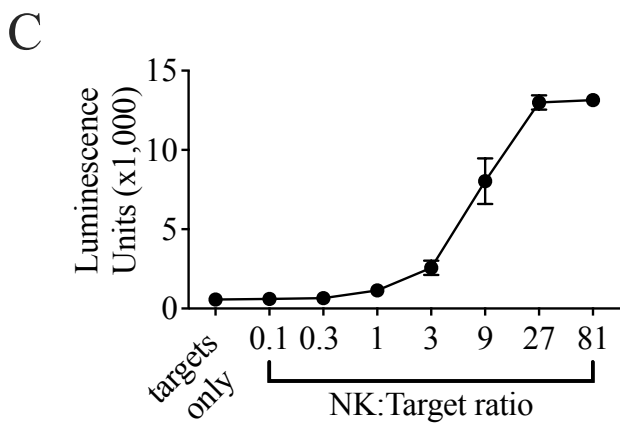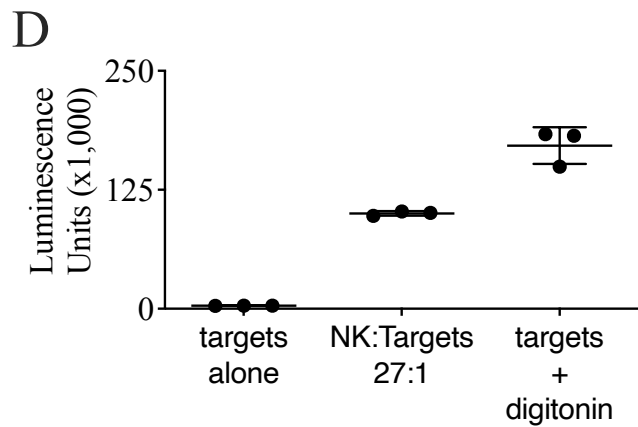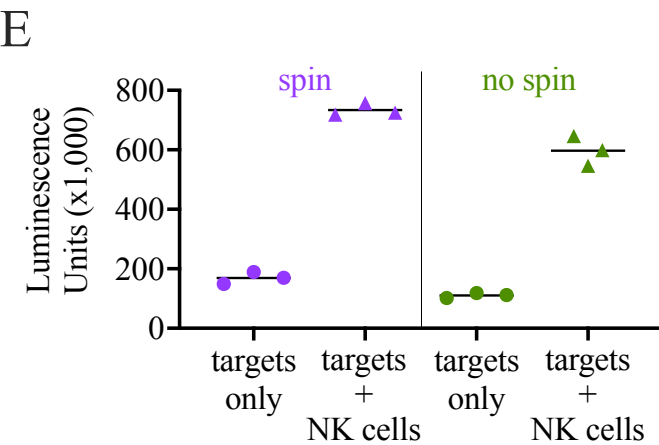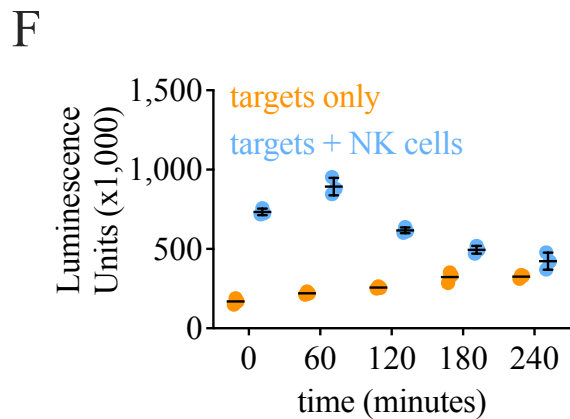

Figure 1

A

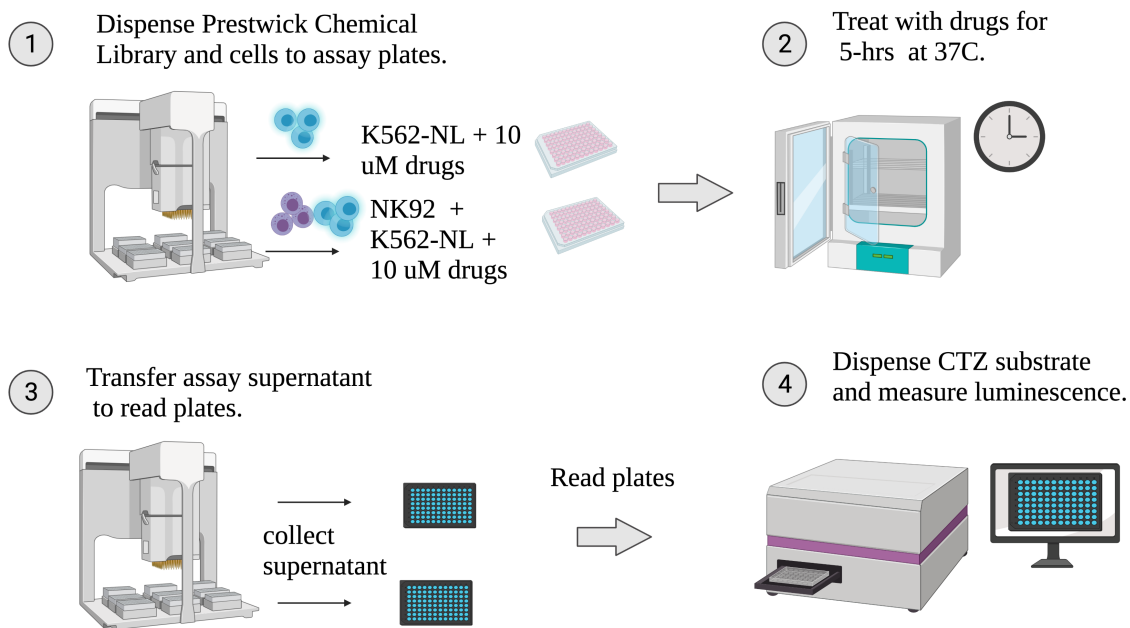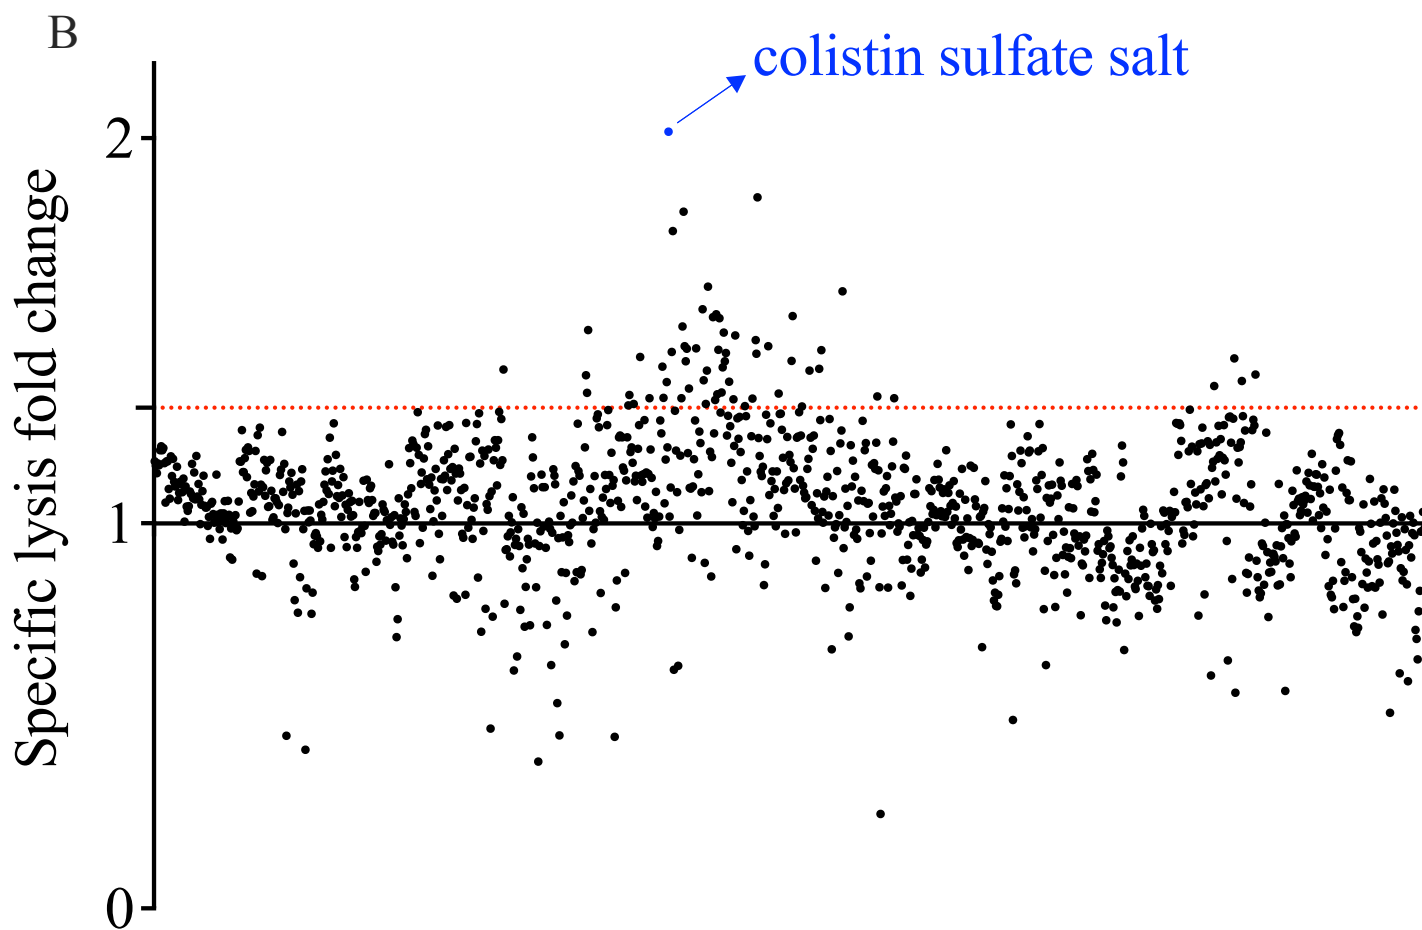

Figure 2



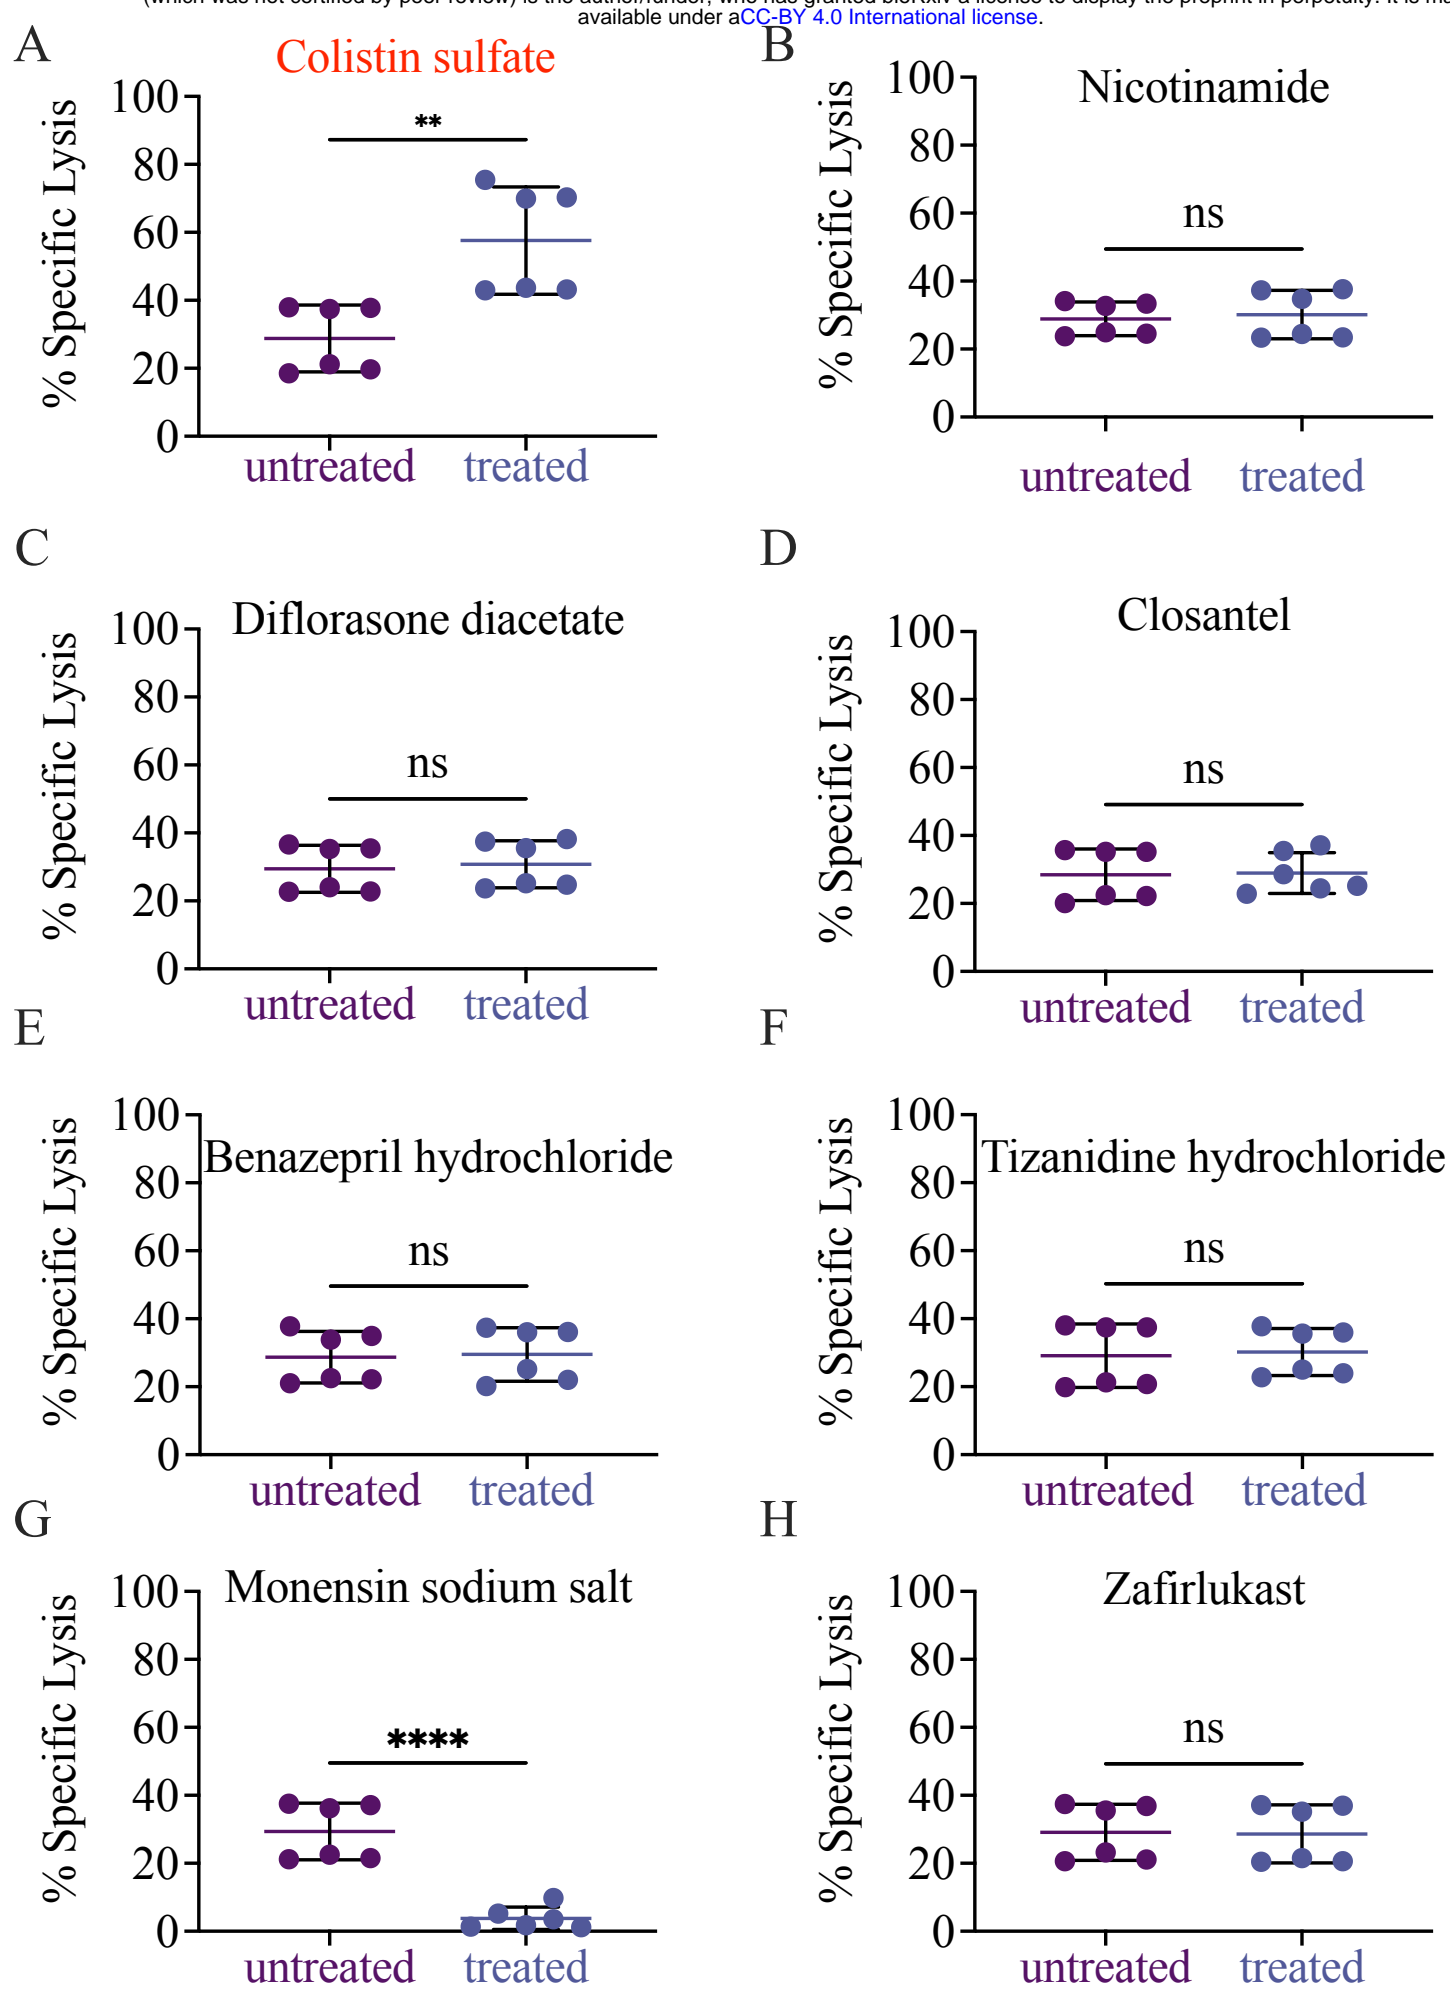

Figure 3

\*\*\*\* Colistin sulfate

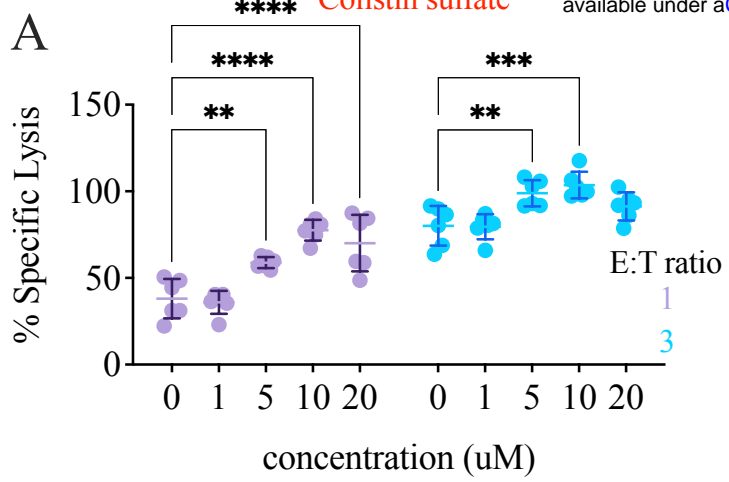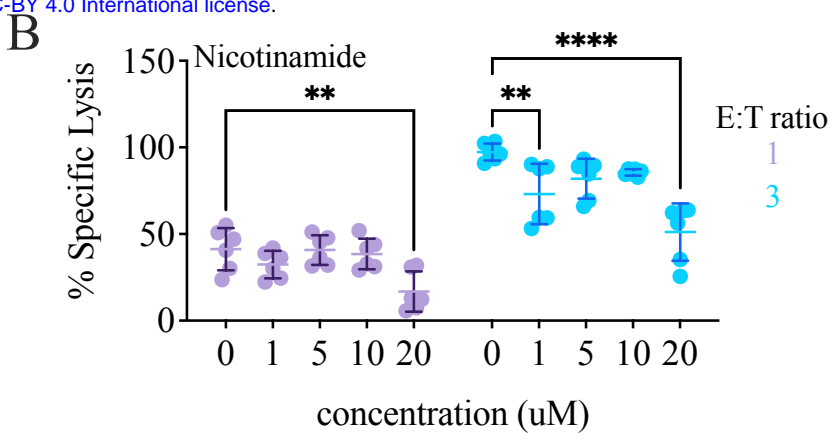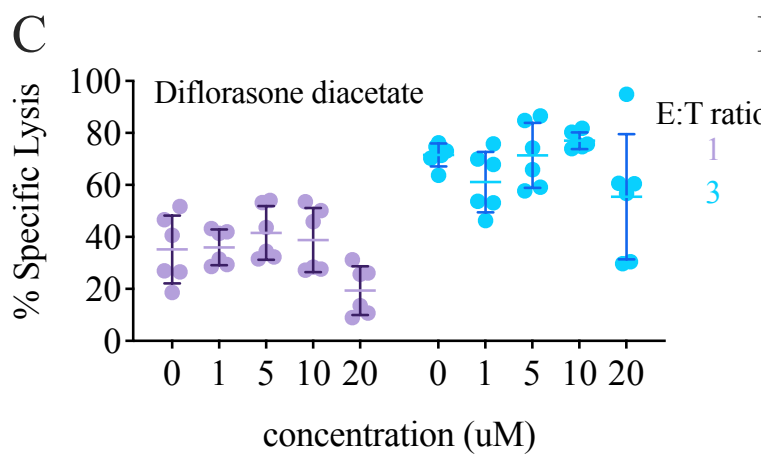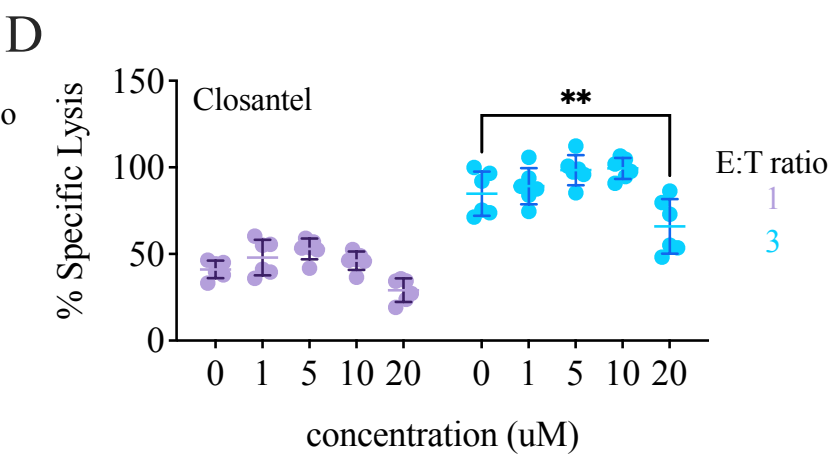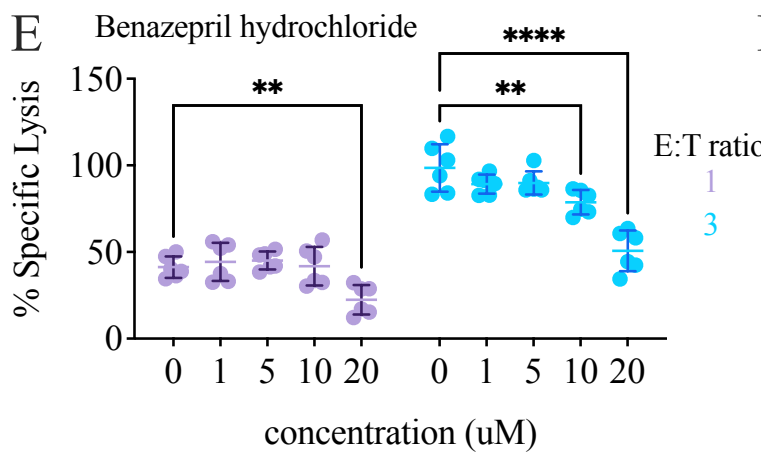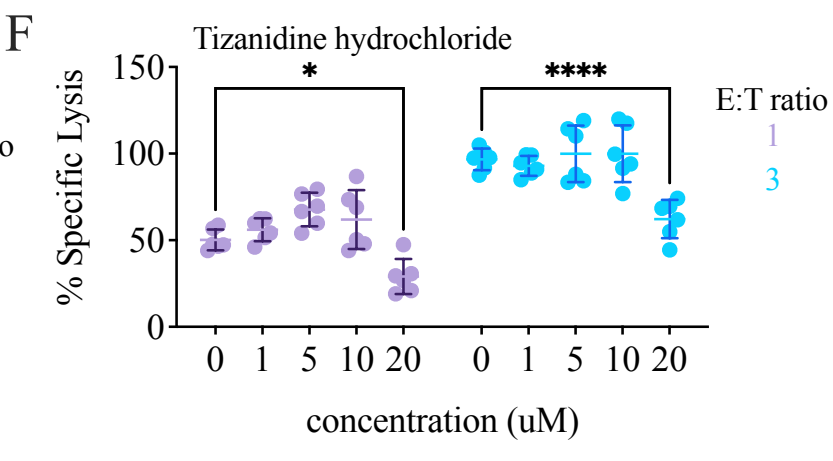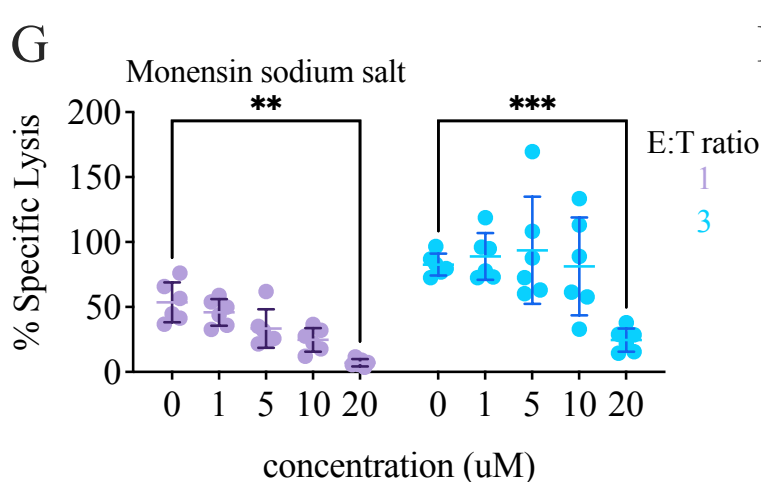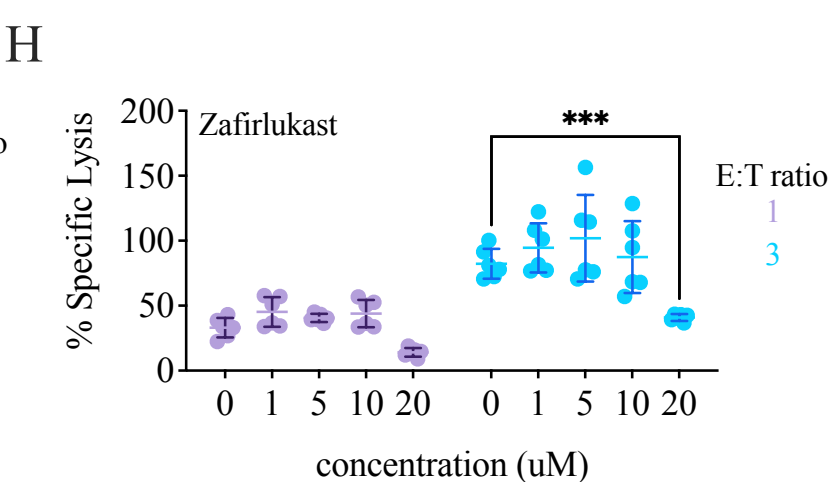

Figure 4

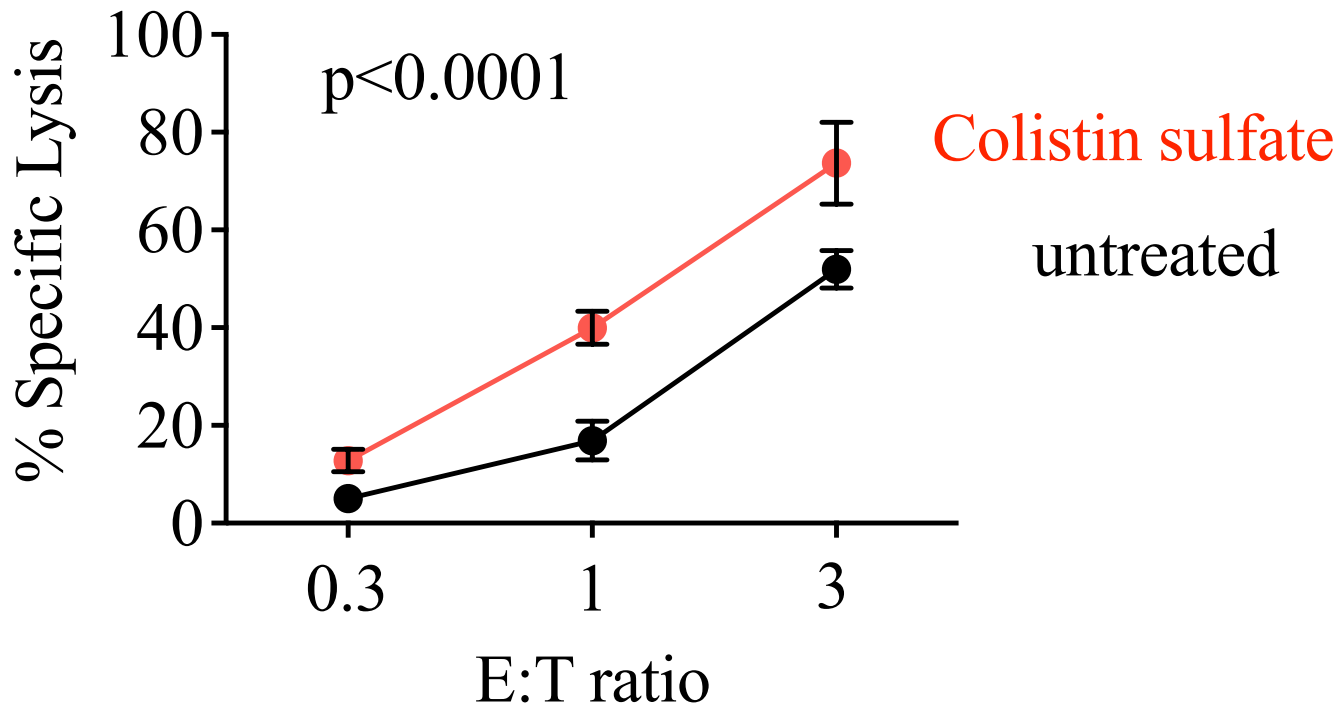

Figure 5

A

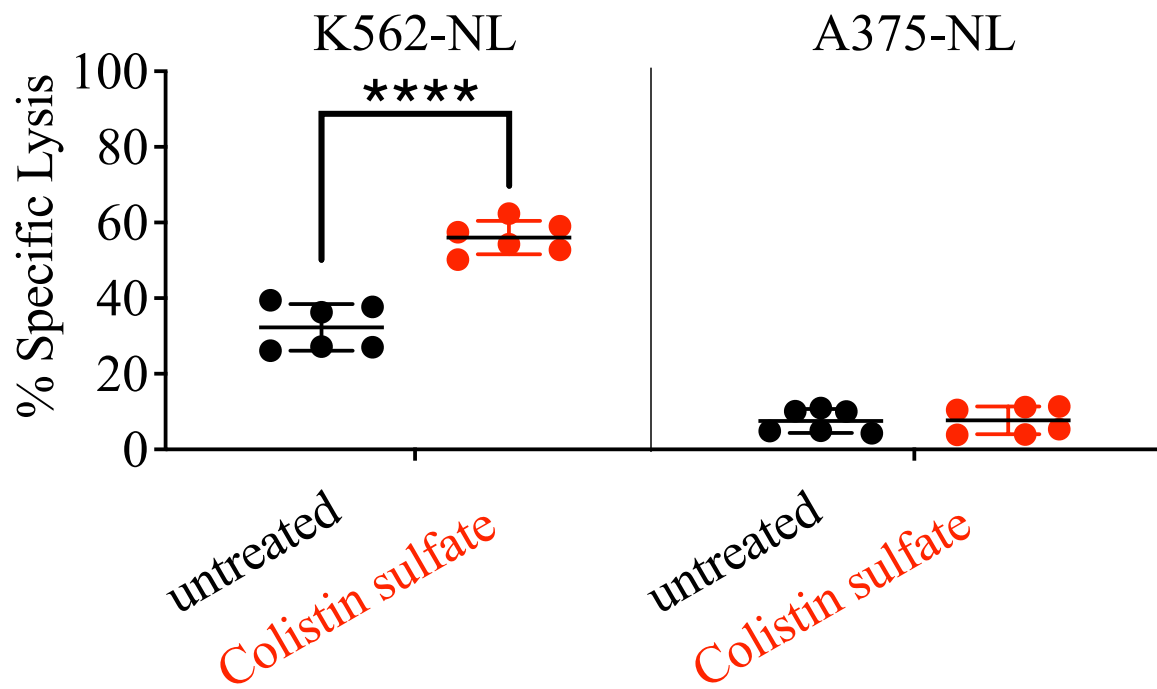

B

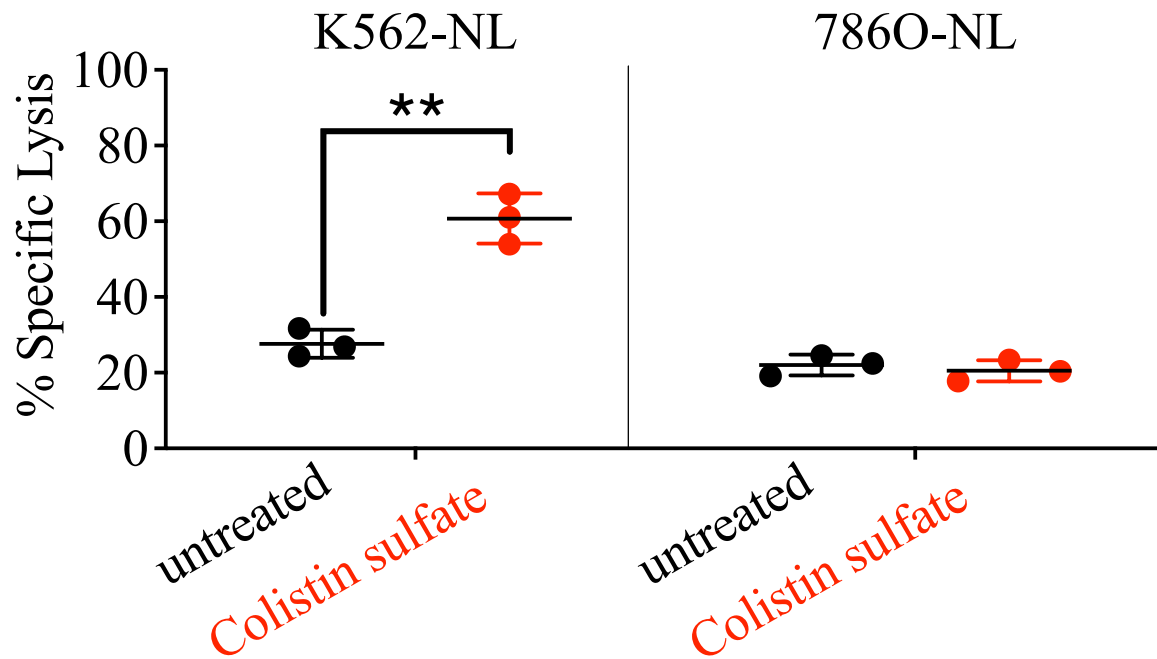

Figure 6

A

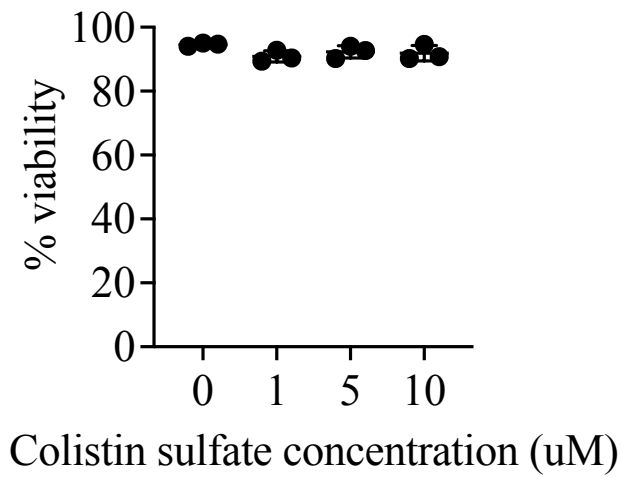

B

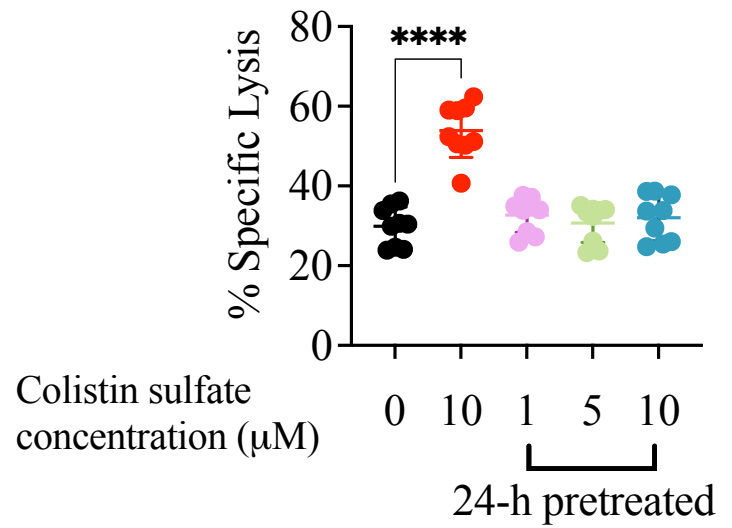

C

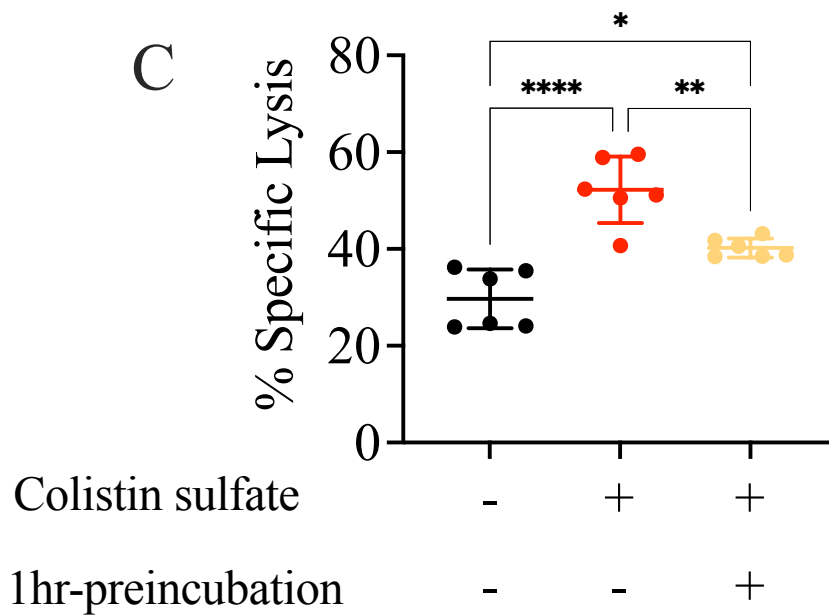

D

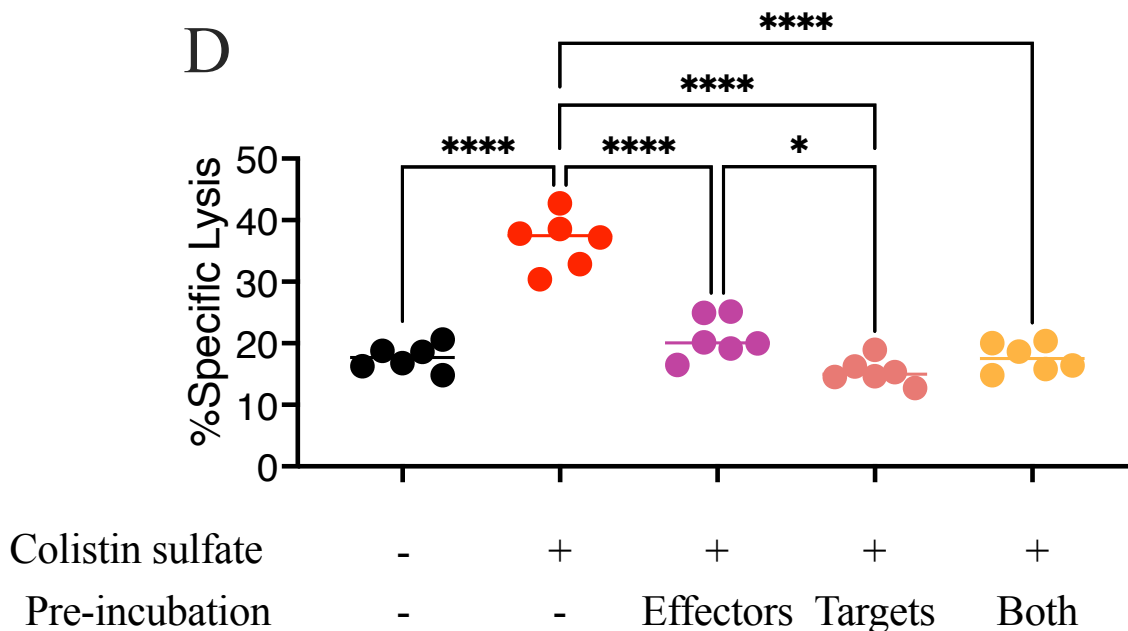

Figure 7

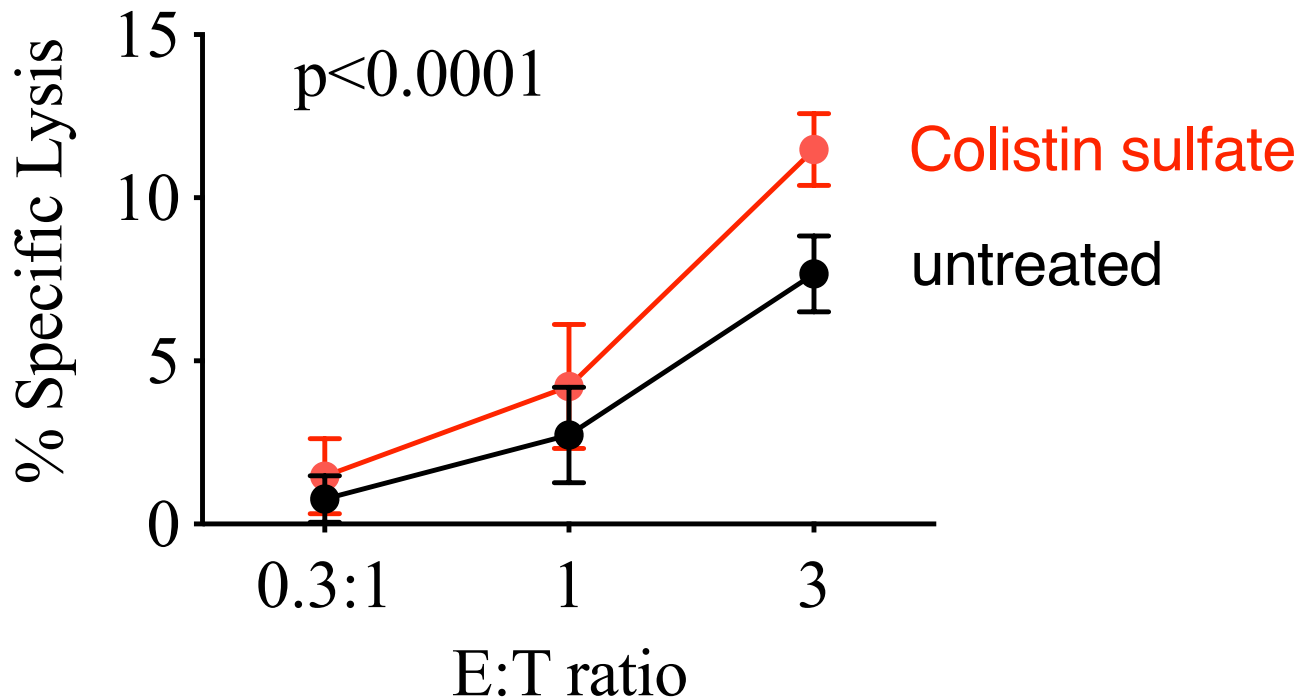

Figure 8

| <b>E:T=1</b> | <b>1</b> | <b>2</b> | <b>3</b> | <b>4</b> | <b>5</b> | <b>6</b> | <b>7</b> | <b>8</b> | <b>9</b> | <b>10</b> | <b>11</b> | <b>12</b> |
|--------------|----------|----------|----------|----------|----------|----------|----------|----------|----------|-----------|-----------|-----------|
| <b>A</b>     |          |          |          |          |          |          |          |          |          |           |           |           |
| <b>B</b>     |          |          |          |          |          |          |          |          |          |           |           |           |
| <b>C</b>     |          |          |          |          |          |          |          |          |          |           |           |           |
| <b>D</b>     |          |          |          |          |          |          |          |          |          |           |           |           |
| <b>E</b>     |          |          |          |          |          |          |          |          |          |           |           |           |
| <b>F</b>     |          |          |          |          |          |          |          |          |          |           |           |           |
| <b>G</b>     |          |          |          |          |          |          |          |          |          |           |           |           |
| <b>H</b>     |          |          |          |          |          |          |          |          |          |           |           |           |

10% DMSO

Drugs

E:T=9

| <b>Targets alone</b> | <b>1</b> | <b>2</b> | <b>3</b> | <b>4</b> | <b>5</b> | <b>6</b> | <b>7</b> | <b>8</b> | <b>9</b> | <b>10</b> | <b>11</b> | <b>12</b> |
|----------------------|----------|----------|----------|----------|----------|----------|----------|----------|----------|-----------|-----------|-----------|
| <b>A</b>             |          |          |          |          |          |          |          |          |          |           |           |           |
| <b>B</b>             |          |          |          |          |          |          |          |          |          |           |           |           |
| <b>C</b>             |          |          |          |          |          |          |          |          |          |           |           |           |
| <b>D</b>             |          |          |          |          |          |          |          |          |          |           |           |           |
| <b>E</b>             |          |          |          |          |          |          |          |          |          |           |           |           |
| <b>F</b>             |          |          |          |          |          |          |          |          |          |           |           |           |
| <b>G</b>             |          |          |          |          |          |          |          |          |          |           |           |           |
| <b>H</b>             |          |          |          |          |          |          |          |          |          |           |           |           |

10% DMSO

Drugs

Digitonin

A

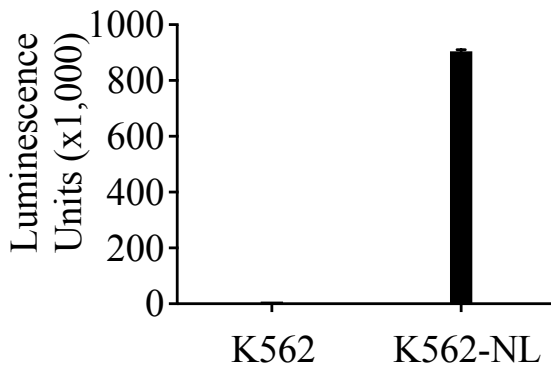

B

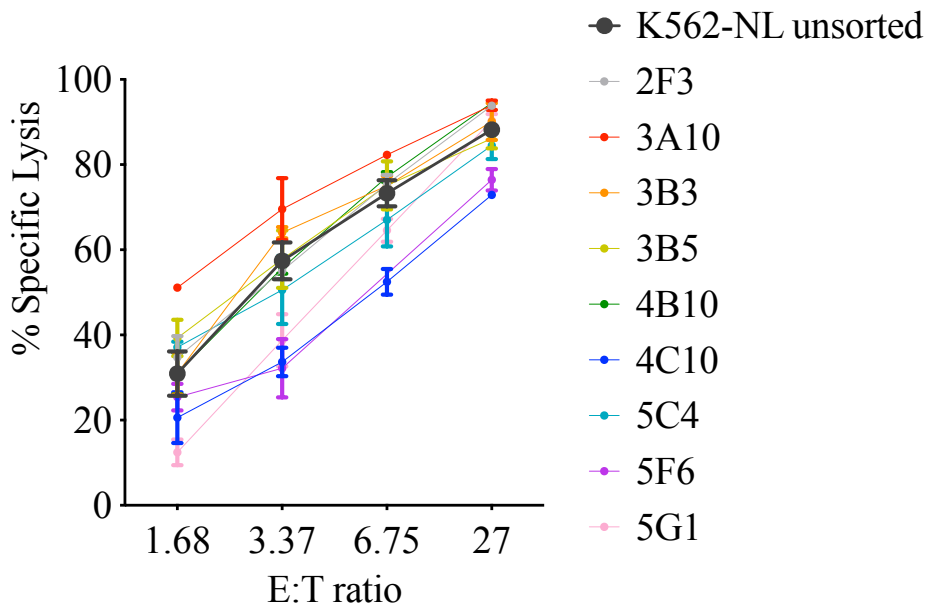



## Contents

|                                                                                                                                                   |           |
|---------------------------------------------------------------------------------------------------------------------------------------------------|-----------|
| <b>Supplemental Table 1. Fold-change of NK92 and K562-NL cells treated with compounds from the Prestwick Chemical Library drug screening.....</b> | <b>1</b>  |
| <b>Supplemental Table 2. Compounds of the Prestwick Chemical Library excluded from analysis. ...</b>                                              | <b>53</b> |
| <b>Supplemental Table 3. Z' factor for individual assay plates from the screening of the Prestwick Chemical Library. ....</b>                     | <b>54</b> |

**Supplemental Table 1. Fold-change of NK92 and K562-NL cells treated with compounds from the Prestwick Chemical Library drug screening.** Fold-change of luminescent values of all wells containing compounds compared DMSO control wells in the same plate. Each compound was evaluated in singlet over 2 biological replicates. <sup>a</sup>Plates 5 & 7: fold-change of one replicate.

| <b>Prestw number</b> | <b>Plate # / Well position</b> | <b>Chemical name</b>              | <b>Target alone</b> | <b>1:1 E:T</b> |
|----------------------|--------------------------------|-----------------------------------|---------------------|----------------|
| <i>Plate 1</i>       |                                |                                   |                     |                |
| <b>Prestw-1</b>      | 01A02                          | Azaguanine-8                      | 0.84                | 1.16           |
| <b>Prestw-2</b>      | 01A03                          | Allantoin                         | 0.86                | 1.15           |
| <b>Prestw-3</b>      | 01A04                          | Acetazolamide                     | 0.87                | 1.13           |
| <b>Prestw-4</b>      | 01A05                          | Metformin hydrochloride           | 0.86                | 1.16           |
| <b>Prestw-5</b>      | 01A06                          | Atracurium besylate               | 0.83                | 1.15           |
| <b>Prestw-6</b>      | 01A07                          | Isoflupredone acetate             | 0.76                | 1.19           |
| <b>Prestw-7</b>      | 01A08                          | Amiloride hydrochloride dihydrate | 0.89                | 1.20           |
| <b>Prestw-8</b>      | 01A09                          | Amprolium hydrochloride           | 0.85                | 1.19           |
| <b>Prestw-9</b>      | 01A10                          | Hydrochlorothiazide               | 0.81                | 1.20           |
| <b>Prestw-10</b>     | 01A11                          | Sulfaguanidine                    | 0.79                | 1.16           |
| <b>Prestw-11</b>     | 01B02                          | Meticrane                         | 0.86                | 1.05           |
| <b>Prestw-12</b>     | 01B03                          | Benzonatate                       | 0.81                | 1.16           |
| <b>Prestw-13</b>     | 01B04                          | Hydroflumethiazide                | 0.92                | 1.16           |
| <b>Prestw-14</b>     | 01B05                          | Sulfacetamide sodic hydrate       | 0.83                | 1.09           |
| <b>Prestw-15</b>     | 01B06                          | Heptaminol hydrochloride          | 0.87                | 1.06           |
| <b>Prestw-16</b>     | 01B07                          | Sulfathiazole                     | 0.88                | 1.17           |
| <b>Prestw-17</b>     | 01B08                          | Levodopa                          | 0.86                | 1.12           |
| <b>Prestw-18</b>     | 01B09                          | Idoxuridine                       | 0.89                | 1.17           |
| <b>Prestw-19</b>     | 01B10                          | Captopril                         | 0.84                | 1.11           |
| <b>Prestw-20</b>     | 01B11                          | Minoxidil                         | 0.88                | 1.10           |

|                  |       |                                   |      |      |
|------------------|-------|-----------------------------------|------|------|
| <b>Prestw-21</b> | 01C02 | Sulfaphenazole                    | 0.91 | 1.10 |
| <b>Prestw-22</b> | 01C03 | Panthenol (D)                     | 0.97 | 1.15 |
| <b>Prestw-23</b> | 01C04 | Sulfadiazine                      | 0.93 | 1.06 |
| <b>Prestw-24</b> | 01C05 | Norethynodrel                     | 0.98 | 1.08 |
| <b>Prestw-25</b> | 01C06 | Thiamphenicol                     | 0.91 | 1.11 |
| <b>Prestw-26</b> | 01C07 | Cimetidine                        | 0.90 | 1.10 |
| <b>Prestw-27</b> | 01C08 | Doxylamine succinate              | 0.93 | 1.08 |
| <b>Prestw-28</b> | 01C09 | Ethambutol dihydrochloride        | 0.81 | 1.12 |
| <b>Prestw-29</b> | 01C10 | Antipyrine                        | 0.80 | 1.00 |
| <b>Prestw-30</b> | 01C11 | Antipyrine, 4-hydroxy             | 0.83 | 1.10 |
| <b>Prestw-31</b> | 01D02 | Chloramphenicol                   | 0.89 | 1.04 |
| <b>Prestw-32</b> | 01D03 | Epirizole                         | 0.88 | 1.03 |
| <b>Prestw-33</b> | 01D04 | Diprophylline                     | 0.85 | 1.04 |
| <b>Prestw-34</b> | 01D05 | Triamterene                       | 0.92 | 1.08 |
| <b>Prestw-35</b> | 01D06 | Dapsone                           | 0.94 | 1.08 |
| <b>Prestw-36</b> | 01D07 | Troleandomycin                    | 0.91 | 1.15 |
| <b>Prestw-37</b> | 01D08 | Pyrimethamine                     | 0.82 | 1.06 |
| <b>Prestw-38</b> | 01D09 | Hexamethonium dibromide dihydrate | 0.89 | 1.13 |
| <b>Prestw-39</b> | 01D10 | Diflunisal                        | 0.79 | 1.06 |
| <b>Prestw-40</b> | 01D11 | Niclosamide                       | 0.81 | 1.18 |
| <b>Prestw-41</b> | 01E02 | Procaine hydrochloride            | 0.92 | 1.07 |
| <b>Prestw-42</b> | 01E03 | Moxisylyte hydrochloride          | 0.94 | 1.10 |
| <b>Prestw-43</b> | 01E04 | Betazole hydrochloride            | 0.95 | 1.06 |
| <b>Prestw-44</b> | 01E05 | Isoxicam                          | 0.91 | 1.00 |
| <b>Prestw-45</b> | 01E06 | Naproxen                          | 0.91 | 1.05 |
| <b>Prestw-46</b> | 01E07 | Naphazoline hydrochloride         | 0.92 | 1.08 |
| <b>Prestw-47</b> | 01E08 | Ticlopidine hydrochloride         | 0.88 | 1.12 |
| <b>Prestw-48</b> | 01E09 | Dicyclomine hydrochloride         | 0.89 | 1.05 |
| <b>Prestw-49</b> | 01E10 | Amyleine hydrochloride            | 0.84 | 1.04 |
| <b>Prestw-50</b> | 01E11 | Lidocaine hydrochloride           | 0.92 | 1.04 |
| <b>Prestw-51</b> | 01F02 | Trichlorfon                       | 0.93 | 0.99 |
| <b>Prestw-52</b> | 01F03 | Carbamazepine                     | 0.95 | 1.02 |
| <b>Prestw-53</b> | 01F04 | Triflupromazine hydrochloride     | 0.94 | 0.96 |
| <b>Prestw-54</b> | 01F05 | Mefenamic acid                    | 0.91 | 1.05 |
| <b>Prestw-55</b> | 01F06 | Acetohexamide                     | 0.95 | 1.06 |
| <b>Prestw-56</b> | 01F07 | Sulpiride                         | 0.93 | 1.02 |
| <b>Prestw-57</b> | 01F08 | Benoxinate hydrochloride          | 0.85 | 1.00 |
| <b>Prestw-58</b> | 01F09 | Oxethazaine                       | 0.82 | 1.01 |
| <b>Prestw-59</b> | 01F10 | Pheniramine maleate               | 0.80 | 1.13 |
| <b>Prestw-60</b> | 01F11 | Tolazoline hydrochloride          | 0.81 | 1.02 |
| <b>Prestw-61</b> | 01G02 | Morantel tartrate                 | 0.87 | 1.00 |
| <b>Prestw-62</b> | 01G03 | Homatropine hydrobromide (R,S)    | 0.89 | 0.99 |
| <b>Prestw-63</b> | 01G04 | Nifedipine                        | 0.79 | 1.03 |

|                    |       |                                        |      |      |
|--------------------|-------|----------------------------------------|------|------|
| <b>Prestw-64</b>   | 01G05 | Chlorpromazine hydrochloride           | 0.91 | 1.01 |
| <b>Prestw-65</b>   | 01G06 | Diphenhydramine hydrochloride          | 0.77 | 0.96 |
| <b>Prestw-66</b>   | 01G07 | Minaprine dihydrochloride              | 0.83 | 1.03 |
| <b>Prestw-67</b>   | 01G08 | Miconazole                             | 0.85 | 1.06 |
| <b>Prestw-68</b>   | 01G09 | Isoxsuprine hydrochloride              | 0.84 | 1.00 |
| <b>Prestw-69</b>   | 01G10 | Acebutolol hydrochloride               | 0.85 | 1.02 |
| <b>Prestw-70</b>   | 01G11 | Tolnaftate                             | 0.85 | 1.06 |
| <b>Prestw-71</b>   | 01H02 | Todralazine hydrochloride              | 0.82 | 1.02 |
| <b>Prestw-72</b>   | 01H03 | Imipramine hydrochloride               | 0.81 | 0.91 |
| <b>Prestw-73</b>   | 01H04 | Sulindac                               | 0.83 | 0.99 |
| <b>Prestw-74</b>   | 01H05 | Amitryptiline hydrochloride            | 0.90 | 0.91 |
| <b>Prestw-75</b>   | 01H06 | Adiphenine hydrochloride               | 0.87 | 1.01 |
| <b>Prestw-76</b>   | 01H07 | Dibucaine                              | 0.87 | 0.99 |
| <b>Prestw-77</b>   | 01H08 | Prednisone                             | 0.85 | 1.02 |
| <b>Prestw-78</b>   | 01H09 | Thioridazine hydrochloride             | 0.82 | 0.98 |
| <b>Prestw-79</b>   | 01H10 | Diphemanil methylsulfate               | 0.72 | 0.99 |
| <b>Prestw-80</b>   | 01H11 | Trimethobenzamide hydrochloride        | 0.84 | 1.06 |
| <i>Plate 2</i>     |       |                                        |      |      |
| <b>Prestw-81</b>   | 02A02 | Metronidazole                          | 0.89 | 1.16 |
| <b>Prestw-1424</b> | 02A03 | Fulvestrant                            | 0.97 | 1.16 |
| <b>Prestw-83</b>   | 02A04 | Edrophonium chloride                   | 0.92 | 1.24 |
| <b>Prestw-84</b>   | 02A05 | Moroxidine hydrochloride               | 0.83 | 1.13 |
| <b>Prestw-85</b>   | 02A06 | Baclofen (R,S)                         | 0.94 | 1.13 |
| <b>Prestw-86</b>   | 02A07 | Acyclovir                              | 0.95 | 1.17 |
| <b>Prestw-87</b>   | 02A08 | Diazoxide                              | 0.91 | 1.19 |
| <b>Prestw-88</b>   | 02A09 | Amidopyrine                            | 0.93 | 1.12 |
| <b>Prestw-1179</b> | 02A10 | Busulfan                               | 0.90 | 1.20 |
| <b>Prestw-90</b>   | 02A11 | Pindolol                               | 0.91 | 1.19 |
| <b>Prestw-91</b>   | 02B02 | Khellin                                | 0.86 | 1.03 |
| <b>Prestw-92</b>   | 02B03 | Zimelidine dihydrochloride monohydrate | 0.92 | 1.08 |
| <b>Prestw-93</b>   | 02B04 | Azacyclonol                            | 0.86 | 1.03 |
| <b>Prestw-94</b>   | 02B05 | Azathioprine                           | 0.89 | 1.07 |
| <b>Prestw-95</b>   | 02B06 | Lynestrenol                            | 0.90 | 1.10 |
| <b>Prestw-96</b>   | 02B07 | Guanabenz acetate                      | 0.95 | 1.19 |
| <b>Prestw-97</b>   | 02B08 | Disulfiram                             | 0.95 | 0.87 |
| <b>Prestw-98</b>   | 02B09 | Acetylsalicylsalicylic acid            | 0.93 | 1.23 |
| <b>Prestw-99</b>   | 02B10 | Mianserine hydrochloride               | 0.96 | 1.08 |
| <b>Prestw-100</b>  | 02B11 | Nocodazole                             | 0.99 | 1.25 |

|                    |       |                                            |      |      |
|--------------------|-------|--------------------------------------------|------|------|
| <b>Prestw-101</b>  | 02C02 | R(-) Apomorphine hydrochloride hemihydrate | 0.89 | 1.10 |
| <b>Prestw-102</b>  | 02C03 | Amoxapine                                  | 0.87 | 0.86 |
| <b>Prestw-103</b>  | 02C04 | Cyproheptadine hydrochloride               | 0.84 | 1.09 |
| <b>Prestw-104</b>  | 02C05 | Famotidine                                 | 0.88 | 1.16 |
| <b>Prestw-105</b>  | 02C06 | Danazol                                    | 0.98 | 1.07 |
| <b>Prestw-106</b>  | 02C07 | Nicorandil                                 | 0.93 | 1.14 |
| <b>Prestw-1314</b> | 02C08 | Pioglitazone                               | 1.02 | 1.16 |
| <b>Prestw-108</b>  | 02C09 | Nomifensine maleate                        | 0.89 | 1.04 |
| <b>Prestw-109</b>  | 02C10 | Dizocilpine maleate                        | 0.86 | 1.04 |
| <b>Prestw-1192</b> | 02C11 | Oxandrolone                                | 0.83 | 1.16 |
| <b>Prestw-111</b>  | 02D02 | Naloxone hydrochloride                     | 0.94 | 1.08 |
| <b>Prestw-112</b>  | 02D03 | Metolazone                                 | 0.80 | 1.01 |
| <b>Prestw-113</b>  | 02D04 | Ciprofloxacin hydrochloride                | 0.93 | 1.02 |
| <b>Prestw-114</b>  | 02D05 | Ampicillin trihydrate                      | 0.91 | 1.06 |
| <b>Prestw-115</b>  | 02D06 | Haloperidol                                | 0.95 | 1.06 |
| <b>Prestw-116</b>  | 02D07 | Naltrexone hydrochloride dihydrate         | 0.90 | 1.06 |
| <b>Prestw-117</b>  | 02D08 | Chlorpheniramine maleate                   | 0.90 | 1.00 |
| <b>Prestw-118</b>  | 02D09 | Nalbuphine hydrochloride                   | 0.85 | 1.05 |
| <b>Prestw-119</b>  | 02D10 | Picotamide monohydrate                     | 0.83 | 1.13 |
| <b>Prestw-120</b>  | 02D11 | Triamcinolone                              | 0.81 | 1.14 |
| <b>Prestw-121</b>  | 02E02 | Bromocryptine mesylate                     | 0.85 | 1.24 |
| <b>Prestw-1471</b> | 02E03 | Amfepramone hydrochloride                  | 0.93 | 1.08 |
| <b>Prestw-123</b>  | 02E04 | Dehydrocholic acid                         | 0.93 | 1.15 |

|                    |       |                                 |      |      |
|--------------------|-------|---------------------------------|------|------|
| <b>Prestw-1184</b> | 02E05 | Tioconazole                     | 0.94 | 0.98 |
| <b>Prestw-125</b>  | 02E06 | Perphenazine                    | 0.98 | 0.45 |
| <b>Prestw-126</b>  | 02E07 | Mefloquine hydrochloride        | 0.95 | 1.03 |
| <b>Prestw-127</b>  | 02E08 | Isoconazole                     | 0.88 | 1.04 |
| <b>Prestw-128</b>  | 02E09 | Spiro lactone                   | 0.86 | 1.11 |
| <b>Prestw-129</b>  | 02E10 | Pirenzepine dihydrochloride     | 0.88 | 1.09 |
| <b>Prestw-130</b>  | 02E11 | Dexamethasone acetate           | 0.88 | 1.13 |
| <b>Prestw-131</b>  | 02F02 | Glipizide                       | 0.86 | 1.07 |
| <b>Prestw-132</b>  | 02F03 | Loxapine succinate              | 0.78 | 0.90 |
| <b>Prestw-133</b>  | 02F04 | Hydroxyzine dihydrochloride     | 0.77 | 0.80 |
| <b>Prestw-134</b>  | 02F05 | Diltiazem hydrochloride         | 1.00 | 1.03 |
| <b>Prestw-135</b>  | 02F06 | Methotrexate                    | 0.88 | 1.10 |
| <b>Prestw-136</b>  | 02F07 | Astemizole                      | 0.94 | 0.77 |
| <b>Prestw-137</b>  | 02F08 | Clindamycin hydrochloride       | 0.92 | 1.08 |
| <b>Prestw-138</b>  | 02F09 | Terfenadine                     | 1.10 | 0.86 |
| <b>Prestw-139</b>  | 02F10 | Cefotaxime sodium salt          | 0.93 | 1.11 |
| <b>Prestw-140</b>  | 02F11 | Tetracycline hydrochloride      | 0.84 | 1.14 |
| <b>Prestw-141</b>  | 02G02 | Verapamil hydrochloride         | 0.87 | 0.99 |
| <b>Prestw-142</b>  | 02G03 | Dipyridamole                    | 0.93 | 1.03 |
| <b>Prestw-143</b>  | 02G04 | Chlorhexidine                   | 1.36 | 0.41 |
| <b>Prestw-144</b>  | 02G05 | Loperamide hydrochloride        | 0.93 | 0.83 |
| <b>Prestw-145</b>  | 02G06 | Chlortetracycline hydrochloride | 0.91 | 1.03 |
| <b>Prestw-146</b>  | 02G07 | Tamoxifen citrate               | 0.87 | 1.00 |

|                    |       |                               |      |      |
|--------------------|-------|-------------------------------|------|------|
| <b>Prestw-147</b>  | 02G08 | Nicergoline                   | 0.90 | 1.03 |
| <b>Prestw-148</b>  | 02G09 | Canrenoic acid potassium salt | 0.87 | 1.01 |
| <b>Prestw-149</b>  | 02G10 | Thiopropazine dimesylate      | 0.86 | 0.77 |
| <b>Prestw-150</b>  | 02G11 | Dihydroergotamine tartrate    | 0.89 | 0.82 |
| <b>Prestw-151</b>  | 02H02 | Erythromycin                  | 0.76 | 0.95 |
| <b>Prestw-1474</b> | 02H03 | Chloroxine                    | 0.84 | 0.97 |
| <b>Prestw-153</b>  | 02H04 | Didanosine                    | 0.87 | 0.97 |
| <b>Prestw-154</b>  | 02H05 | Josamycin                     | 0.87 | 0.97 |
| <b>Prestw-155</b>  | 02H06 | Paclitaxel                    | 0.82 | 0.94 |
| <b>Prestw-156</b>  | 02H07 | Ivermectin                    | 0.79 | 1.05 |
| <b>Prestw-157</b>  | 02H08 | Gallamine triethiodide        | 0.79 | 0.95 |
| <b>Prestw-158</b>  | 02H09 | Neomycin sulfate              | 0.87 | 1.02 |
| <b>Prestw-159</b>  | 02H10 | Dihydrostreptomycin sulfate   | 0.85 | 1.01 |
| <b>Prestw-160</b>  | 02H11 | Gentamicine sulfate           | 0.89 | 1.06 |
| <i>Plate 3</i>     |       |                               |      |      |
| <b>Prestw-161</b>  | 03A02 | Isoniazid                     | 0.90 | 1.10 |
| <b>Prestw-162</b>  | 03A03 | Pentylentetrazole             | 0.95 | 1.14 |
| <b>Prestw-163</b>  | 03A04 | Chlorzoxazone                 | 0.89 | 1.09 |
| <b>Prestw-164</b>  | 03A05 | Ornidazole                    | 0.86 | 1.17 |
| <b>Prestw-165</b>  | 03A06 | Ethosuximide                  | 0.94 | 1.08 |
| <b>Prestw-166</b>  | 03A07 | Mafenide hydrochloride        | 0.97 | 1.22 |
| <b>Prestw-167</b>  | 03A08 | Riluzole hydrochloride        | 0.95 | 0.94 |
| <b>Prestw-168</b>  | 03A09 | Nitrofurantoin                | 0.91 | 1.11 |

|                   |       |                               |      |      |
|-------------------|-------|-------------------------------|------|------|
| <b>Prestw-169</b> | 03A10 | Hydralazine hydrochloride     | 0.87 | 1.14 |
| <b>Prestw-170</b> | 03A11 | Phenelzine sulfate            | 0.96 | 1.26 |
| <b>Prestw-171</b> | 03B02 | Tranexamic acid               | 0.86 | 1.04 |
| <b>Prestw-172</b> | 03B03 | Etofylline                    | 1.01 | 1.18 |
| <b>Prestw-173</b> | 03B04 | Tranlycypromine hydrochloride | 0.90 | 1.07 |
| <b>Prestw-174</b> | 03B05 | Alverine citrate salt         | 0.97 | 1.10 |
| <b>Prestw-175</b> | 03B06 | Aceclofenac                   | 0.92 | 1.07 |
| <b>Prestw-176</b> | 03B07 | Iproniazide phosphate         | 0.88 | 1.14 |
| <b>Prestw-177</b> | 03B08 | Sulfamethoxazole              | 0.84 | 1.02 |
| <b>Prestw-178</b> | 03B09 | Mephenesin                    | 0.90 | 1.07 |
| <b>Prestw-179</b> | 03B10 | Phenformin hydrochloride      | 0.86 | 1.12 |
| <b>Prestw-180</b> | 03B11 | Flutamide                     | 0.96 | 0.96 |
| <b>Prestw-181</b> | 03C02 | Ampyrone                      | 0.93 | 1.05 |
| <b>Prestw-182</b> | 03C03 | Levamisole hydrochloride      | 0.84 | 0.94 |
| <b>Prestw-183</b> | 03C04 | Pargyline hydrochloride       | 0.83 | 1.03 |
| <b>Prestw-184</b> | 03C05 | Methocarbamol                 | 0.95 | 1.08 |
| <b>Prestw-185</b> | 03C06 | Aztreonam                     | 0.86 | 1.06 |
| <b>Prestw-186</b> | 03C07 | Cloxacillin sodium salt       | 0.88 | 1.02 |
| <b>Prestw-187</b> | 03C08 | Catharanthine                 | 0.89 | 1.06 |
| <b>Prestw-188</b> | 03C09 | Pentolinium bitartrate        | 0.85 | 1.02 |
| <b>Prestw-189</b> | 03C10 | Aminopurine, 6-benzyl         | 0.69 | 0.85 |
| <b>Prestw-190</b> | 03C11 | Tolbutamide                   | 0.88 | 0.84 |
| <b>Prestw-191</b> | 03D02 | Midodrine hydrochloride       | 0.87 | 0.96 |

|                    |       |                                            |      |      |
|--------------------|-------|--------------------------------------------|------|------|
| <b>Prestw-192</b>  | 03D03 | Thalidomide                                | 0.88 | 0.94 |
| <b>Prestw-193</b>  | 03D04 | Oxolinic acid                              | 0.94 | 0.98 |
| <b>Prestw-194</b>  | 03D05 | Nimesulide                                 | 0.90 | 1.06 |
| <b>Prestw-195</b>  | 03D06 | Hydrastinine hydrochloride                 | 0.85 | 0.98 |
| <b>Prestw-196</b>  | 03D07 | Pentoxifylline                             | 0.93 | 0.97 |
| <b>Prestw-197</b>  | 03D08 | Metaraminol bitartrate                     | 0.85 | 0.99 |
| <b>Prestw-198</b>  | 03D09 | Salbutamol                                 | 0.86 | 1.11 |
| <b>Prestw-199</b>  | 03D10 | Prilocaine hydrochloride                   | 0.91 | 0.99 |
| <b>Prestw-200</b>  | 03D11 | Camptothecine (S,+)                        | 0.88 | 0.87 |
| <b>Prestw-201</b>  | 03E02 | Ranitidine hydrochloride                   | 0.90 | 1.11 |
| <b>Prestw-202</b>  | 03E03 | Tiratricol, 3,3',5-triiodothyroacetic acid | 0.83 | 1.06 |
| <b>Prestw-203</b>  | 03E04 | Flufenamic acid                            | 0.92 | 1.05 |
| <b>Prestw-204</b>  | 03E05 | Flumequine                                 | 0.98 | 1.09 |
| <b>Prestw-205</b>  | 03E06 | Tolfenamic acid                            | 0.90 | 1.10 |
| <b>Prestw-206</b>  | 03E07 | Meclofenamic acid sodium salt monohydrate  | 0.85 | 1.06 |
| <b>Prestw-1181</b> | 03E08 | Tibolone                                   | 1.04 | 1.02 |
| <b>Prestw-208</b>  | 03E09 | Trimethoprim                               | 0.94 | 1.03 |
| <b>Prestw-209</b>  | 03E10 | Metoclopramide monohydrochloride           | 0.87 | 1.03 |
| <b>Prestw-210</b>  | 03E11 | Fenbendazole                               | 0.90 | 0.90 |
| <b>Prestw-211</b>  | 03F02 | Piroxicam                                  | 0.92 | 0.94 |
| <b>Prestw-212</b>  | 03F03 | Pyrantel tartrate                          | 0.86 | 0.93 |
| <b>Prestw-213</b>  | 03F04 | Fenspiride hydrochloride                   | 0.93 | 0.97 |
| <b>Prestw-214</b>  | 03F05 | Gemfibrozil                                | 0.87 | 0.95 |



|                   |       |                                 |      |      |
|-------------------|-------|---------------------------------|------|------|
| <b>Prestw-215</b> | 03F06 | Mefexamide hydrochloride        | 0.85 | 0.97 |
| <b>Prestw-216</b> | 03F07 | Tiapride hydrochloride          | 0.92 | 1.05 |
| <b>Prestw-217</b> | 03F08 | Mebendazole                     | 0.91 | 1.03 |
| <b>Prestw-218</b> | 03F09 | Fenbufen                        | 0.86 | 1.03 |
| <b>Prestw-219</b> | 03F10 | Ketoprofen                      | 0.88 | 0.96 |
| <b>Prestw-220</b> | 03F11 | Indapamide                      | 0.88 | 1.01 |
| <b>Prestw-221</b> | 03G02 | Norfloxacin                     | 0.82 | 1.01 |
| <b>Prestw-222</b> | 03G03 | Antimycin A                     | 0.95 | 1.15 |
| <b>Prestw-223</b> | 03G04 | Xylometazoline hydrochloride    | 0.87 | 1.00 |
| <b>Prestw-224</b> | 03G05 | Oxymetazoline hydrochloride     | 0.89 | 1.02 |
| <b>Prestw-225</b> | 03G06 | Nifedazone                      | 0.87 | 0.95 |
| <b>Prestw-226</b> | 03G07 | Griseofulvin                    | 0.75 | 0.95 |
| <b>Prestw-227</b> | 03G08 | Clemizole hydrochloride         | 0.88 | 1.02 |
| <b>Prestw-228</b> | 03G09 | Tropicamide                     | 0.86 | 0.83 |
| <b>Prestw-229</b> | 03G10 | Nefopam hydrochloride           | 0.88 | 0.70 |
| <b>Prestw-230</b> | 03G11 | Phentolamine hydrochloride      | 0.86 | 0.75 |
| <b>Prestw-231</b> | 03H02 | Etodolac                        | 0.92 | 1.07 |
| <b>Prestw-232</b> | 03H03 | Scopolamin-N-oxide hydrobromide | 0.95 | 0.97 |
| <b>Prestw-233</b> | 03H04 | Hyoscyamine (L)                 | 0.95 | 1.01 |
| <b>Prestw-234</b> | 03H05 | Chlorphensin carbamate          | 0.92 | 0.99 |
| <b>Prestw-235</b> | 03H06 | Metampicillin sodium salt       | 0.92 | 0.94 |
| <b>Prestw-236</b> | 03H07 | Dilazep dihydrochloride         | 0.95 | 1.01 |
| <b>Prestw-237</b> | 03H08 | Ofloxacin                       | 0.97 | 1.05 |

|                   |       |                             |      |      |
|-------------------|-------|-----------------------------|------|------|
| <b>Prestw-238</b> | 03H09 | Lomefloxacin hydrochloride  | 0.96 | 1.03 |
| <b>Prestw-239</b> | 03H10 | Orphenadrine hydrochloride  | 0.95 | 0.91 |
| <b>Prestw-240</b> | 03H11 | Proglumide                  | 0.85 | 1.08 |
| <i>Plate 4</i>    |       |                             |      |      |
| <b>Prestw-241</b> | 04A02 | Mexiletine hydrochloride    | 0.91 | 1.20 |
| <b>Prestw-242</b> | 04A03 | Flavoxate hydrochloride     | 0.84 | 1.16 |
| <b>Prestw-243</b> | 04A04 | Bufexamac                   | 0.85 | 1.09 |
| <b>Prestw-244</b> | 04A05 | Glutethimide, para-amino    | 0.96 | 1.22 |
| <b>Prestw-245</b> | 04A06 | Dropropizine (R,S)          | 0.89 | 1.21 |
| <b>Prestw-246</b> | 04A07 | Pinacidil                   | 0.92 | 1.03 |
| <b>Prestw-247</b> | 04A08 | Albendazole                 | 0.92 | 1.02 |
| <b>Prestw-248</b> | 04A09 | Clonidine hydrochloride     | 0.86 | 1.20 |
| <b>Prestw-249</b> | 04A10 | Bupropion hydrochloride     | 0.86 | 1.29 |
| <b>Prestw-250</b> | 04A11 | Alprenolol hydrochloride    | 0.90 | 1.18 |
| <b>Prestw-251</b> | 04B02 | Chlorothiazide              | 0.82 | 0.95 |
| <b>Prestw-252</b> | 04B03 | Diphenidol hydrochloride    | 0.78 | 1.10 |
| <b>Prestw-253</b> | 04B04 | Norethindrone               | 0.80 | 1.13 |
| <b>Prestw-254</b> | 04B05 | Nortriptyline hydrochloride | 0.80 | 0.99 |
| <b>Prestw-255</b> | 04B06 | Niflumic acid               | 0.82 | 1.17 |
| <b>Prestw-256</b> | 04B07 | Isotretinoin                | 0.84 | 1.23 |
| <b>Prestw-257</b> | 04B08 | Retinoic acid               | 0.89 | 1.24 |
| <b>Prestw-258</b> | 04B09 | Antazoline hydrochloride    | 0.83 | 1.11 |
| <b>Prestw-259</b> | 04B10 | Ethacrynic acid             | 0.89 | 1.20 |

|                   |       |                                     |      |      |
|-------------------|-------|-------------------------------------|------|------|
| <b>Prestw-260</b> | 04B11 | Praziquantel                        | 0.86 | 1.10 |
| <b>Prestw-261</b> | 04C02 | Ethisterone                         | 0.81 | 1.04 |
| <b>Prestw-262</b> | 04C03 | Triprolidine hydrochloride          | 0.83 | 1.12 |
| <b>Prestw-263</b> | 04C04 | Doxepin hydrochloride               | 0.86 | 0.86 |
| <b>Prestw-264</b> | 04C05 | Dyclonine hydrochloride             | 0.76 | 1.01 |
| <b>Prestw-265</b> | 04C06 | Dimenhydrinate                      | 0.82 | 1.09 |
| <b>Prestw-266</b> | 04C07 | Disopyramide                        | 0.87 | 1.14 |
| <b>Prestw-267</b> | 04C08 | Clotrimazole                        | 0.92 | 1.06 |
| <b>Prestw-268</b> | 04C09 | Vinpocetine                         | 0.86 | 1.25 |
| <b>Prestw-269</b> | 04C10 | Clomipramine hydrochloride          | 0.84 | 0.97 |
| <b>Prestw-270</b> | 04C11 | Fendiline hydrochloride             | 0.89 | 0.91 |
| <b>Prestw-271</b> | 04D02 | Vincamine                           | 0.82 | 1.12 |
| <b>Prestw-272</b> | 04D03 | Indomethacin                        | 0.83 | 1.02 |
| <b>Prestw-273</b> | 04D04 | Cortisone                           | 0.78 | 1.11 |
| <b>Prestw-274</b> | 04D05 | Prednisolone                        | 0.98 | 1.16 |
| <b>Prestw-275</b> | 04D06 | Fenofibrate                         | 0.82 | 1.12 |
| <b>Prestw-276</b> | 04D07 | Bumetanide                          | 0.88 | 1.25 |
| <b>Prestw-277</b> | 04D08 | Labetalol hydrochloride             | 0.84 | 1.09 |
| <b>Prestw-278</b> | 04D09 | Cinnarizine                         | 0.86 | 1.18 |
| <b>Prestw-279</b> | 04D10 | Methylprednisolone, 6-alpha         | 0.80 | 1.26 |
| <b>Prestw-280</b> | 04D11 | Quinidine hydrochloride monohydrate | 0.80 | 1.14 |
| <b>Prestw-281</b> | 04E02 | Fludrocortisone acetate             | 0.81 | 1.11 |
| <b>Prestw-282</b> | 04E03 | Fenoterol hydrobromide              | 0.82 | 1.15 |

|                   |       |                                    |      |      |
|-------------------|-------|------------------------------------|------|------|
| <b>Prestw-283</b> | 04E04 | Homochlorcyclizine dihydrochloride | 0.72 | 0.81 |
| <b>Prestw-284</b> | 04E05 | Diethylcarbamazine citrate         | 0.78 | 1.19 |
| <b>Prestw-285</b> | 04E06 | Chenodiol                          | 0.86 | 1.13 |
| <b>Prestw-286</b> | 04E07 | Perhexiline maleate                | 0.82 | 0.80 |
| <b>Prestw-287</b> | 04E08 | Oxybutynin chloride                | 0.81 | 1.06 |
| <b>Prestw-288</b> | 04E09 | S Piperone                         | 0.86 | 1.14 |
| <b>Prestw-289</b> | 04E10 | Pyrilamine maleate                 | 0.83 | 1.13 |
| <b>Prestw-290</b> | 04E11 | Sulfinpyrazone                     | 0.77 | 1.09 |
| <b>Prestw-291</b> | 04F02 | Dantrolene sodium salt             | 0.73 | 0.97 |
| <b>Prestw-292</b> | 04F03 | Trazodone hydrochloride            | 0.71 | 0.96 |
| <b>Prestw-293</b> | 04F04 | Glafenine hydrochloride            | 0.79 | 1.09 |
| <b>Prestw-294</b> | 04F05 | Pimethixene maleate                | 0.73 | 0.81 |
| <b>Prestw-295</b> | 04F06 | Pergolide mesylate                 | 0.85 | 1.26 |
| <b>Prestw-296</b> | 04F07 | Acemetacin                         | 0.77 | 1.05 |
| <b>Prestw-297</b> | 04F08 | Benzydamine hydrochloride          | 0.83 | 0.99 |
| <b>Prestw-298</b> | 04F09 | Fipexide hydrochloride             | 0.84 | 1.17 |
| <b>Prestw-299</b> | 04F10 | Mifepristone                       | 0.84 | 1.17 |
| <b>Prestw-300</b> | 04F11 | Diperodon hydrochloride            | 0.81 | 1.01 |
| <b>Prestw-301</b> | 04G02 | Lisinopril                         | 0.80 | 0.96 |
| <b>Prestw-302</b> | 04G03 | Lincomycin hydrochloride           | 0.79 | 1.04 |
| <b>Prestw-303</b> | 04G04 | Telenzepine dihydrochloride        | 0.80 | 1.06 |
| <b>Prestw-304</b> | 04G05 | Econazole nitrate                  | 0.81 | 1.21 |
| <b>Prestw-305</b> | 04G06 | Bupivacaine hydrochloride          | 0.80 | 1.26 |

|                            |       |                                      |      |      |
|----------------------------|-------|--------------------------------------|------|------|
| <b>Prestw-306</b>          | 04G07 | Clemastine fumarate                  | 0.77 | 0.86 |
| <b>Prestw-307</b>          | 04G08 | Oxytetracycline dihydrate            | 0.84 | 1.29 |
| <b>Prestw-308</b>          | 04G09 | Pimozide                             | 0.85 | 1.16 |
| <b>Prestw-309</b>          | 04G10 | Amodiaquin dihydrochloride dihydrate | 0.89 | 0.72 |
| <b>Prestw-310</b>          | 04G11 | Mebeverine hydrochloride             | 0.84 | 1.19 |
| <b>Prestw-311</b>          | 04H02 | Ifenprodil tartrate                  | 0.75 | 0.98 |
| <b>Prestw-312</b>          | 04H03 | Flunarizine dihydrochloride          | 0.78 | 1.17 |
| <b>Prestw-313</b>          | 04H04 | Trifluoperazine dihydrochloride      | 0.79 | 0.78 |
| <b>Prestw-314</b>          | 04H05 | Enalapril maleate                    | 0.85 | 1.05 |
| <b>Prestw-315</b>          | 04H06 | Minocycline hydrochloride            | 0.83 | 1.04 |
| <b>Prestw-316</b>          | 04H07 | Glibenclamide                        | 0.81 | 1.19 |
| <b>Prestw-317</b>          | 04H08 | Guanethidine sulfate                 | 0.82 | 1.07 |
| <b>Prestw-318</b>          | 04H09 | Quinacrine dihydrochloride dihydrate | 0.85 | 0.47 |
| <b>Prestw-319</b>          | 04H10 | Clofilium tosylate                   | 0.85 | 1.08 |
| <b>Prestw-320</b>          | 04H11 | Fluphenazine dihydrochloride         | 0.85 | 0.76 |
| <i>Plate 5<sup>a</sup></i> |       |                                      |      |      |
| <b>Prestw-321</b>          | 05A02 | Streptomycin sulfate                 | 1.03 | 1.09 |
| <b>Prestw-322</b>          | 05A03 | Alfuzosin hydrochloride              | 1.00 | 1.14 |
| <b>Prestw-323</b>          | 05A04 | Chlorpropamide <sup>a</sup>          | 1.04 | 1.09 |
| <b>Prestw-324</b>          | 05A05 | Phenylpropanolamine hydrochloride    | 1.03 | 1.08 |
| <b>Prestw-325</b>          | 05A06 | Ascorbic acid                        | 1.13 | 1.10 |
| <b>Prestw-326</b>          | 05A07 | Methyldopa (L,-)                     | 1.08 | 1.12 |
| <b>Prestw-327</b>          | 05A08 | Cefoperazone dihydrate               | 1.04 | 1.09 |

|                   |       |                               |      |      |
|-------------------|-------|-------------------------------|------|------|
| <b>Prestw-328</b> | 05A09 | Zoxazolamine                  | 0.97 | 1.17 |
| <b>Prestw-329</b> | 05A10 | Tacrine hydrochloride hydrate | 0.92 | 1.07 |
| <b>Prestw-330</b> | 05A11 | Bisoprolol fumarate           | 0.97 | 1.27 |
| <b>Prestw-331</b> | 05B02 | Tremorine dihydrochloride     | 0.87 | 0.79 |
| <b>Prestw-332</b> | 05B03 | Practolol                     | 0.89 | 0.93 |
| <b>Prestw-333</b> | 05B04 | Zidovudine, AZT               | 0.97 | 0.93 |
| <b>Prestw-334</b> | 05B05 | Sulfisoxazole                 | 0.94 | 0.97 |
| <b>Prestw-335</b> | 05B06 | Zaprinast                     | 1.04 | 1.02 |
| <b>Prestw-336</b> | 05B07 | Chlormezanone                 | 0.92 | 0.91 |
| <b>Prestw-337</b> | 05B08 | Procainamide hydrochloride    | 0.93 | 0.98 |
| <b>Prestw-338</b> | 05B09 | N6-methyladenosine            | 0.97 | 1.00 |
| <b>Prestw-339</b> | 05B10 | Guanfacine hydrochloride      | 1.44 | 1.05 |
| <b>Prestw-340</b> | 05B11 | Domperidone                   | 0.92 | 0.62 |
| <b>Prestw-341</b> | 05C02 | Furosemide                    | 0.93 | 0.93 |
| <b>Prestw-342</b> | 05C03 | Methapyrilene hydrochloride   | 0.90 | 0.96 |
| <b>Prestw-343</b> | 05C04 | Desipramine hydrochloride     | 0.78 | 0.65 |
| <b>Prestw-344</b> | 05C05 | Clorgyline hydrochloride      | 0.88 | 0.98 |
| <b>Prestw-345</b> | 05C06 | Clenbuterol hydrochloride     | 0.96 | 0.94 |
| <b>Prestw-346</b> | 05C07 | Maprotiline hydrochloride     | 0.99 | 0.78 |
| <b>Prestw-347</b> | 05C08 | Thioguanosine                 | 0.96 | 1.04 |
| <b>Prestw-348</b> | 05C09 | Chlorprothixene hydrochloride | 0.93 | 0.88 |
| <b>Prestw-349</b> | 05C10 | Ritodrine hydrochloride       | 1.69 | 1.03 |
| <b>Prestw-350</b> | 05C11 | Clozapine                     | 0.96 | 0.73 |

|                   |       |                                           |      |      |
|-------------------|-------|-------------------------------------------|------|------|
| <b>Prestw-351</b> | 05D02 | Chlorthalidone                            | 0.91 | 0.88 |
| <b>Prestw-352</b> | 05D03 | Dobutamine hydrochloride                  | 0.86 | 0.91 |
| <b>Prestw-353</b> | 05D04 | Moclobemide                               | 0.95 | 1.00 |
| <b>Prestw-354</b> | 05D05 | Cloпамide                                 | 0.98 | 0.94 |
| <b>Prestw-355</b> | 05D06 | Hycanthone                                | 0.93 | 0.74 |
| <b>Prestw-356</b> | 05D07 | Adenosine 5'-monophosphate monohydrate    | 1.03 | 1.12 |
| <b>Prestw-357</b> | 05D08 | Amoxicillin                               | 1.05 | 1.22 |
| <b>Prestw-358</b> | 05D09 | Cephalexin monohydrate                    | 1.07 | 1.17 |
| <b>Prestw-359</b> | 05D10 | Dextromethorphan hydrobromide monohydrate | 1.09 | 1.01 |
| <b>Prestw-360</b> | 05D11 | Droperidol                                | 1.04 | 0.95 |
| <b>Prestw-361</b> | 05E02 | Bambuterol hydrochloride                  | 0.97 | 0.88 |
| <b>Prestw-362</b> | 05E03 | Betamethasone                             | 0.95 | 1.09 |
| <b>Prestw-363</b> | 05E04 | Colchicine                                | 1.01 | 0.38 |
| <b>Prestw-364</b> | 05E05 | Metergoline                               | 1.08 | 0.94 |
| <b>Prestw-365</b> | 05E06 | Brinzolamide                              | 1.02 | 0.98 |
| <b>Prestw-366</b> | 05E07 | Ambroxol hydrochloride                    | 0.98 | 1.13 |
| <b>Prestw-367</b> | 05E08 | Benfluorex hydrochloride                  | 0.99 | 1.09 |
| <b>Prestw-368</b> | 05E09 | Bepriдил hydrochloride                    | 0.96 | 0.99 |
| <b>Prestw-369</b> | 05E10 | Meloxicam                                 | 1.50 | 0.98 |
| <b>Prestw-370</b> | 05E11 | Benzbromarone                             | 1.01 | 0.94 |
| <b>Prestw-371</b> | 05F02 | Ketotifen fumarate                        | 0.88 | 0.78 |
| <b>Prestw-372</b> | 05F03 | Debrisoquin sulfate                       | 0.98 | 0.99 |
| <b>Prestw-373</b> | 05F04 | Amethopterin (R,S)                        | 0.97 | 1.07 |

|                    |       |                              |      |      |
|--------------------|-------|------------------------------|------|------|
| <b>Prestw-374</b>  | 05F05 | Methylergometrine maleate    | 1.09 | 0.99 |
| <b>Prestw-375</b>  | 05F06 | Methiothepin maleate         | 1.14 | 0.63 |
| <b>Prestw-376</b>  | 05F07 | Clofazimine                  | 0.98 | 0.98 |
| <b>Prestw-377</b>  | 05F08 | Nafronyl oxalate             | 1.09 | 1.14 |
| <b>Prestw-378</b>  | 05F09 | Bezafibrate                  | 1.02 | 1.12 |
| <b>Prestw-1152</b> | 05F10 | Nefazodone HCl               | 1.34 | 1.04 |
| <b>Prestw-380</b>  | 05F11 | Clebopride maleate           | 1.12 | 0.80 |
| <b>Prestw-381</b>  | 05G02 | Lidoflazine                  | 0.80 | 0.53 |
| <b>Prestw-382</b>  | 05G03 | Betaxolol hydrochloride      | 1.00 | 0.96 |
| <b>Prestw-383</b>  | 05G04 | Nicardipine hydrochloride    | 0.36 | 0.45 |
| <b>Prestw-384</b>  | 05G05 | Probucol                     | 0.95 | 1.02 |
| <b>Prestw-385</b>  | 05G06 | Mitoxantrone dihydrochloride | 1.05 | 0.87 |
| <b>Prestw-386</b>  | 05G07 | GBR 12909 dihydrochloride    | 0.98 | 0.96 |
| <b>Prestw-387</b>  | 05G08 | Carbetapentane citrate       | 1.00 | 1.05 |
| <b>Prestw-388</b>  | 05G09 | Dequalinium dichloride       | 1.12 | 0.69 |
| <b>Prestw-389</b>  | 05G10 | Ketoconazole                 | 1.00 | 0.85 |
| <b>Prestw-390</b>  | 05G11 | Fusidic acid sodium salt     | 1.04 | 0.76 |
| <b>Prestw-391</b>  | 05H02 | Terbutaline hemisulfate      | 0.91 | 1.01 |
| <b>Prestw-392</b>  | 05H03 | Ketanserin tartrate hydrate  | 0.90 | 1.02 |
| <b>Prestw-393</b>  | 05H04 | Hemicholinium bromide        | 0.84 | 0.99 |
| <b>Prestw-394</b>  | 05H05 | Kanamycin A sulfate          | 0.97 | 1.05 |
| <b>Prestw-395</b>  | 05H06 | Amikacin hydrate             | 0.95 | 0.98 |
| <b>Prestw-396</b>  | 05H07 | Etoposide                    | 0.97 | 1.04 |



|                    |       |                             |      |      |
|--------------------|-------|-----------------------------|------|------|
| <b>Prestw-397</b>  | 05H08 | Clomiphene citrate (Z,E)    | 0.94 | 0.88 |
| <b>Prestw-398</b>  | 05H09 | Oxantel pamoate             | 0.93 | 1.03 |
| <b>Prestw-399</b>  | 05H10 | Prochlorperazine dimaleate  | 1.03 | 0.81 |
| <b>Prestw-400</b>  | 05H11 | Hesperidin                  | 0.95 | 1.22 |
| <i>Plate 6</i>     |       |                             |      |      |
| <b>Prestw-401</b>  | 06A02 | Testosterone propionate     | 1.02 | 1.14 |
| <b>Prestw-402</b>  | 06A03 | Arecoline hydrobromide      | 1.03 | 1.12 |
| <b>Prestw-403</b>  | 06A04 | Thyroxine (L)               | 1.00 | 0.87 |
| <b>Prestw-1288</b> | 06A05 | Idebenone                   | 1.03 | 0.88 |
| <b>Prestw-405</b>  | 06A06 | Pepstatin A                 | 0.99 | 1.01 |
| <b>Prestw-406</b>  | 06A07 | SR-95639A                   | 0.99 | 1.06 |
| <b>Prestw-407</b>  | 06A08 | Adamantamine fumarate       | 1.03 | 1.20 |
| <b>Prestw-408</b>  | 06A09 | Butoconazole nitrate        | 1.04 | 1.38 |
| <b>Prestw-409</b>  | 06A10 | Amiodarone hydrochloride    | 1.00 | 1.34 |
| <b>Prestw-410</b>  | 06A11 | Amphotericin B              | 1.04 | 1.50 |
| <b>Prestw-411</b>  | 06B02 | Androsterone                | 0.93 | 1.03 |
| <b>Prestw-1489</b> | 06B03 | Amifostine                  | 0.94 | 1.09 |
| <b>Prestw-413</b>  | 06B04 | Carbarsone                  | 0.94 | 0.95 |
| <b>Prestw-1219</b> | 06B05 | Amlodipine                  | 1.07 | 0.72 |
| <b>Prestw-1147</b> | 06B06 | Modafinil                   | 1.00 | 0.99 |
| <b>Prestw-416</b>  | 06B07 | Bacampicillin hydrochloride | 1.06 | 1.12 |
| <b>Prestw-1298</b> | 06B08 | Lamivudine                  | 0.98 | 1.00 |
| <b>Prestw-418</b>  | 06B09 | Biotin                      | 0.99 | 1.27 |

|                    |       |                               |      |      |
|--------------------|-------|-------------------------------|------|------|
| <b>Prestw-419</b>  | 06B10 | Bisacodyl                     | 1.04 | 1.28 |
| <b>Prestw-1242</b> | 06B11 | Erlotinib                     | 0.99 | 1.25 |
| <b>Prestw-421</b>  | 06C02 | Suloctidil                    | 0.99 | 1.03 |
| <b>Prestw-1368</b> | 06C03 | Zotepine                      | 0.97 | 0.82 |
| <b>Prestw-423</b>  | 06C04 | Carisoprodol                  | 0.97 | 1.02 |
| <b>Prestw-424</b>  | 06C05 | Cephalosporanic acid, 7-amino | 0.97 | 1.07 |
| <b>Prestw-425</b>  | 06C06 | Chicago sky blue 6B           | 0.88 | 1.01 |
| <b>Prestw-426</b>  | 06C07 | Buflomedil hydrochloride      | 0.98 | 1.13 |
| <b>Prestw-1393</b> | 06C08 | Dibenzepine hydrochloride     | 1.06 | 1.09 |
| <b>Prestw-428</b>  | 06C09 | Roxatidine Acetate HCl        | 1.05 | 1.26 |
| <b>Prestw-429</b>  | 06C10 | Cholecalciferol               | 1.00 | 1.29 |
| <b>Prestw-430</b>  | 06C11 | Cisapride                     | 0.97 | 1.13 |
| <b>Prestw-1303</b> | 06D02 | Pefloxacin                    | 0.86 | 1.05 |
| <b>Prestw-432</b>  | 06D03 | Corticosterone                | 1.03 | 1.18 |
| <b>Prestw-433</b>  | 06D04 | Cyanocobalamin                | 0.85 | 1.10 |
| <b>Prestw-434</b>  | 06D05 | Cefadroxil                    | 0.94 | 1.11 |
| <b>Prestw-435</b>  | 06D06 | Cyclosporin A                 | 0.93 | 0.45 |
| <b>Prestw-436</b>  | 06D07 | Digitoxigenin                 | 1.12 | 0.78 |
| <b>Prestw-437</b>  | 06D08 | Digoxin                       | 1.11 | 0.85 |
| <b>Prestw-438</b>  | 06D09 | Doxorubicin hydrochloride     | 1.01 | 1.06 |
| <b>Prestw-439</b>  | 06D10 | Carbimazole                   | 0.95 | 1.22 |
| <b>Prestw-440</b>  | 06D11 | Epiandrosterone               | 1.00 | 1.23 |
| <b>Prestw-441</b>  | 06E02 | Estradiol-17 beta             | 0.88 | 1.04 |

|                    |       |                                        |      |      |
|--------------------|-------|----------------------------------------|------|------|
| <b>Prestw-1380</b> | 06E03 | Clobutinol hydrochloride               | 0.98 | 1.22 |
| <b>Prestw-443</b>  | 06E04 | Gabazine                               | 0.92 | 1.15 |
| <b>Prestw-1156</b> | 06E05 | Oxcarbazepine                          | 0.95 | 1.14 |
| <b>Prestw-445</b>  | 06E06 | Cyclobenzaprine hydrochloride          | 0.96 | 0.87 |
| <b>Prestw-446</b>  | 06E07 | Carteolol hydrochloride                | 0.98 | 1.11 |
| <b>Prestw-447</b>  | 06E08 | Hydrocortisone base                    | 1.06 | 1.22 |
| <b>Prestw-448</b>  | 06E09 | Hydroxytacrine maleate (R,S)           | 1.02 | 1.31 |
| <b>Prestw-449</b>  | 06E10 | Pilocarpine nitrate                    | 1.02 | 1.33 |
| <b>Prestw-450</b>  | 06E11 | Dicloxacillin sodium salt              | 1.03 | 1.18 |
| <b>Prestw-451</b>  | 06F02 | Alizapride HCl                         | 1.00 | 1.20 |
| <b>Prestw-1161</b> | 06F03 | Stanozolol                             | 0.92 | 1.16 |
| <b>Prestw-1257</b> | 06F04 | Calcipotriene                          | 0.96 | 1.31 |
| <b>Prestw-1429</b> | 06F05 | Linezolid                              | 0.98 | 1.11 |
| <b>Prestw-455</b>  | 06F06 | Mebhydroline 1,5-naphtalenedisulfonate | 0.96 | 1.12 |
| <b>Prestw-456</b>  | 06F07 | Meclocycline sulfosalicylate           | 0.98 | 1.06 |
| <b>Prestw-457</b>  | 06F08 | Meclozine dihydrochloride              | 1.00 | 1.19 |
| <b>Prestw-458</b>  | 06F09 | Melatonin                              | 0.98 | 1.25 |
| <b>Prestw-1251</b> | 06F10 | Butalbital                             | 1.08 | 1.43 |
| <b>Prestw-460</b>  | 06F11 | Dinoprost trometamol                   | 0.99 | 1.12 |
| <b>Prestw-461</b>  | 06G02 | Tropisetron HCl                        | 0.98 | 1.11 |
| <b>Prestw-462</b>  | 06G03 | Cefixime                               | 0.93 | 1.13 |
| <b>Prestw-463</b>  | 06G04 | Metrizamide                            | 0.92 | 1.27 |
| <b>Prestw-1323</b> | 06G05 | Quetiapine                             | 0.80 | 1.04 |

|                            |       |                            |      |      |
|----------------------------|-------|----------------------------|------|------|
| <b>Prestw-1464</b>         | 06G06 | Tosufloxacin hydrochloride | 0.93 | 1.13 |
| <b>Prestw-1400</b>         | 06G07 | Efavirenz                  | 0.81 | 1.01 |
| <b>Prestw-1157</b>         | 06G08 | Rifapentine                | 0.96 | 1.13 |
| <b>Prestw-468</b>          | 06G09 | Neostigmine bromide        | 0.95 | 1.33 |
| <b>Prestw-469</b>          | 06G10 | Niridazole                 | 0.92 | 1.19 |
| <b>Prestw-470</b>          | 06G11 | Ceforanide                 | 0.90 | 1.12 |
| <b>Prestw-1358</b>         | 06H02 | Vatalanib                  | 0.79 | 0.99 |
| <b>Prestw-1295</b>         | 06H03 | Itopride                   | 0.89 | 1.03 |
| <b>Prestw-473</b>          | 06H04 | Cefotetan                  | 0.93 | 1.01 |
| <b>Prestw-1254</b>         | 06H05 | Fentiazac                  | 0.94 | 1.08 |
| <b>Prestw-475</b>          | 06H06 | Brompheniramine maleate    | 0.96 | 0.94 |
| <b>Prestw-476</b>          | 06H07 | Primaquine diphosphate     | 1.07 | 0.95 |
| <b>Prestw-477</b>          | 06H08 | Progesterone               | 0.97 | 1.02 |
| <b>Prestw-478</b>          | 06H09 | Felodipine                 | 0.92 | 1.27 |
| <b>Prestw-1325</b>         | 06H10 | Raclopride                 | 0.96 | 1.23 |
| <b>Prestw-1385</b>         | 06H11 | Closantel                  | 0.97 | 1.41 |
| <i>Plate 7<sup>a</sup></i> |       |                            |      |      |
| <b>Prestw-481</b>          | 07A02 | Serotonin hydrochloride    | 0.78 | 1.33 |
| <b>Prestw-482</b>          | 07A03 | Cefotiam hydrochloride     | 0.90 | 1.05 |
| <b>Prestw-1336</b>         | 07A04 | Rofecoxib                  | 0.73 | 1.17 |
| <b>Prestw-484</b>          | 07A05 | Benperidol                 | 0.97 | 1.37 |
| <b>Prestw-485</b>          | 07A06 | Cefaclor                   | 0.89 | 1.20 |
| <b>Prestw-486</b>          | 07A07 | Colistin sulfate           | 0.80 | 2.02 |

|                    |       |                                               |      |      |
|--------------------|-------|-----------------------------------------------|------|------|
| <b>Prestw-487</b>  | 07A08 | Daunorubicin hydrochloride                    | 0.87 | 1.02 |
| <b>Prestw-488</b>  | 07A09 | Dosulepin hydrochloride                       | 0.90 | 1.09 |
| <b>Prestw-489</b>  | 07A10 | Ceftazidime pentahydrate                      | 0.88 | 1.44 |
| <b>Prestw-490</b>  | 07A11 | Iobenguane sulfate                            | 0.90 | 1.76 |
| <b>Prestw-491</b>  | 07B02 | Metixene hydrochloride                        | 0.80 | 0.62 |
| <b>Prestw-492</b>  | 07B03 | Nitrofurantoin                                | 0.87 | 1.29 |
| <b>Prestw-493</b>  | 07B04 | Omeprazole                                    | 0.87 | 1.19 |
| <b>Prestw-494</b>  | 07B05 | Propylthiouracil                              | 0.84 | 1.08 |
| <b>Prestw-495</b>  | 07B06 | Terconazole                                   | 0.95 | 0.63 |
| <b>Prestw-496</b>  | 07B07 | Tiaprofenic acid                              | 0.83 | 0.98 |
| <b>Prestw-497</b>  | 07B08 | Vancomycin hydrochloride                      | 0.87 | 1.18 |
| <b>Prestw-498</b>  | 07B09 | Artemisinin                                   | 0.89 | 1.32 |
| <b>Prestw-499</b>  | 07B10 | Propafenone hydrochloride                     | 0.88 | 1.51 |
| <b>Prestw-500</b>  | 07B11 | Ethamivan                                     | 0.79 | 1.81 |
| <b>Prestw-501</b>  | 07C02 | Vigabatrin                                    | 0.81 | 1.46 |
| <b>Prestw-502</b>  | 07C03 | Biperiden hydrochloride                       | 0.75 | 1.42 |
| <b>Prestw-503</b>  | 07C04 | Cetirizine dihydrochloride                    | 0.70 | 1.45 |
| <b>Prestw-504</b>  | 07C05 | Etifenin                                      | 0.91 | 1.18 |
| <b>Prestw-505</b>  | 07C06 | Metaproterenol sulfate, orciprenaline sulfate | 0.86 | 1.35 |
| <b>Prestw-506</b>  | 07C07 | Sisomicin sulfate                             | 0.94 | 1.09 |
| <b>Prestw-1159</b> | 07C08 | Sibutramine HCl                               | 0.97 | 1.09 |
| <b>Prestw-508</b>  | 07C09 | Resveratrol                                   | 0.80 | 0.91 |
| <b>Prestw-509</b>  | 07C10 | Bromperidol                                   | 1.03 | 1.10 |

|                    |       |                                                                        |      |      |
|--------------------|-------|------------------------------------------------------------------------|------|------|
| <b>Prestw-510</b>  | 07C11 | Cyclizine hydrochloride                                                | 0.88 | 1.17 |
| <b>Prestw-511</b>  | 07D02 | Fluoxetine hydrochloride                                               | 0.87 | 1.27 |
| <b>Prestw-512</b>  | 07D03 | Iohexol                                                                | 0.92 | 1.45 |
| <b>Prestw-513</b>  | 07D04 | Norcyclobenzaprine                                                     | 0.89 | 1.02 |
| <b>Prestw-514</b>  | 07D05 | Pyrazinamide                                                           | 0.87 | 1.13 |
| <b>Prestw-515</b>  | 07D06 | Trimethadione                                                          | 0.96 | 1.24 |
| <b>Prestw-516</b>  | 07D07 | Lovastatin                                                             | 0.99 | 1.21 |
| <b>Prestw-517</b>  | 07D08 | Nystatine                                                              | 0.92 | 1.08 |
| <b>Prestw-518</b>  | 07D09 | Budesonide                                                             | 0.83 | 1.56 |
| <b>Prestw-519</b>  | 07D10 | Imipenem                                                               | 0.92 | 1.37 |
| <b>Prestw-520</b>  | 07D11 | Sulfasalazine                                                          | 0.57 | 0.90 |
| <b>Prestw-1430</b> | 07E02 | Lofexidine                                                             | 0.99 | 1.31 |
| <b>Prestw-522</b>  | 07E03 | Thiostrepton                                                           | 0.84 | 1.40 |
| <b>Prestw-1169</b> | 07E04 | Miglitol                                                               | 1.06 | 1.61 |
| <b>Prestw-524</b>  | 07E05 | Tiabendazole                                                           | 1.02 | 1.08 |
| <b>Prestw-525</b>  | 07E06 | Rifampicin                                                             | 0.87 | 1.19 |
| <b>Prestw-526</b>  | 07E07 | Ethionamide                                                            | 1.06 | 0.86 |
| <b>Prestw-527</b>  | 07E08 | Tenoxicam                                                              | 0.88 | 1.17 |
| <b>Prestw-528</b>  | 07E09 | Triflusal                                                              | 0.96 | 1.54 |
| <b>Prestw-529</b>  | 07E10 | Mesoridazine besylate                                                  | 0.96 | 1.23 |
| <b>Prestw-530</b>  | 07E11 | Trolox                                                                 | 1.05 | 1.32 |
| <b>Prestw-531</b>  | 07F02 | Pirenperone                                                            | 0.99 | 1.54 |
| <b>Prestw-532</b>  | 07F03 | Isoquinoline, 6,7-dimethoxy-1-methyl-1,2,3,4-tetrahydro, hydrochloride | 1.01 | 1.34 |

|                   |       |                               |      |      |
|-------------------|-------|-------------------------------|------|------|
| <b>Prestw-533</b> | 07F04 | Phenacetin                    | 0.87 | 1.45 |
| <b>Prestw-534</b> | 07F05 | Atovaquone                    | 1.05 | 1.53 |
| <b>Prestw-535</b> | 07F06 | Methoxamine hydrochloride     | 1.02 | 1.29 |
| <b>Prestw-953</b> | 07F07 | (S)-(-)-Atenolol              | 1.08 | 1.34 |
| <b>Prestw-537</b> | 07F08 | Piracetam                     | 0.81 | 1.41 |
| <b>Prestw-538</b> | 07F09 | Phenindione                   | 1.08 | 1.50 |
| <b>Prestw-539</b> | 07F10 | Thiocolchicoside              | 1.02 | 1.42 |
| <b>Prestw-540</b> | 07F11 | Clorsulon                     | 0.98 | 1.44 |
| <b>Prestw-541</b> | 07G02 | Ciclopirox ethanolamine       | 0.91 | 1.23 |
| <b>Prestw-542</b> | 07G03 | Probenecid                    | 0.92 | 1.28 |
| <b>Prestw-543</b> | 07G04 | Betahistine mesylate          | 0.90 | 1.37 |
| <b>Prestw-544</b> | 07G05 | Tobramycin                    | 1.02 | 1.25 |
| <b>Prestw-545</b> | 07G06 | Tetramisole hydrochloride     | 0.87 | 1.16 |
| <b>Prestw-546</b> | 07G07 | Pregnenolone                  | 0.89 | 1.06 |
| <b>Prestw-547</b> | 07G08 | Molsidomine                   | 1.00 | 1.32 |
| <b>Prestw-548</b> | 07G09 | Chloroquine diphosphate       | 1.10 | 1.20 |
| <b>Prestw-549</b> | 07G10 | Trimetazidine dihydrochloride | 0.96 | 1.49 |
| <b>Prestw-550</b> | 07G11 | Parthenolide                  | 1.03 | 0.93 |
| <b>Prestw-551</b> | 07H02 | Hexetidine                    | 0.83 | 1.27 |
| <b>Prestw-552</b> | 07H03 | Selegiline hydrochloride      | 0.93 | 1.22 |
| <b>Prestw-553</b> | 07H04 | Pentamidine isethionate       | 1.00 | 1.28 |
| <b>Prestw-554</b> | 07H05 | Tolazamide                    | 0.93 | 1.19 |
| <b>Prestw-555</b> | 07H06 | Nifuroxazide                  | 0.86 | 1.11 |

|                    |       |                                        |      |      |
|--------------------|-------|----------------------------------------|------|------|
| <b>Prestw-1144</b> | 07H07 | Mirtazapine                            | 0.93 | 1.00 |
| <b>Prestw-557</b>  | 07H08 | Dirithromycin                          | 0.88 | 1.03 |
| <b>Prestw-558</b>  | 07H09 | Gliclazide                             | 0.88 | 1.30 |
| <b>Prestw-559</b>  | 07H10 | DO 897/99                              | 0.96 | 1.28 |
| <b>Prestw-560</b>  | 07H11 | Prenylamine lactate                    | 0.95 | 1.13 |
| <i>Plate 8</i>     |       |                                        |      |      |
| <b>Prestw-1188</b> | 08A02 | Ziprasidone Hydrochloride              | 1.04 | 0.98 |
| <b>Prestw-1441</b> | 08A03 | Mevastatin                             | 1.04 | 0.92 |
| <b>Prestw-1322</b> | 08A04 | Pyridostigmine iodid                   | 1.03 | 1.06 |
| <b>Prestw-1491</b> | 08A05 | Pentobarbital                          | 1.03 | 1.23 |
| <b>Prestw-565</b>  | 08A06 | Atropine sulfate monohydrate           | 0.95 | 1.32 |
| <b>Prestw-566</b>  | 08A07 | Eserine sulfate, physostigmine sulfate | 1.03 | 1.02 |
| <b>Prestw-1139</b> | 08A08 | Itraconazole                           | 0.93 | 0.99 |
| <b>Prestw-1174</b> | 08A09 | Acarbose                               | 0.98 | 1.48 |
| <b>Prestw-1403</b> | 08A10 | Entacapone                             | 1.03 | 1.44 |
| <b>Prestw-1449</b> | 08A11 | Nicotinamide                           | 0.97 | 1.85 |
| <b>Prestw-571</b>  | 08B02 | Tetracaïne hydrochloride               | 0.99 | 1.22 |
| <b>Prestw-572</b>  | 08B03 | Mometasone furoate                     | 1.07 | 1.17 |
| <b>Prestw-1467</b> | 08B04 | Troglitazone                           | 1.02 | 1.13 |
| <b>Prestw-574</b>  | 08B05 | Dacarbazine                            | 1.01 | 1.12 |
| <b>Prestw-1351</b> | 08B06 | Tenatoprazole                          | 0.99 | 1.15 |
| <b>Prestw-576</b>  | 08B07 | Acetopromazine maleate salt            | 1.03 | 0.84 |
| <b>Prestw-1271</b> | 08B08 | Escitalopram                           | 0.91 | 0.89 |



|                    |       |                                  |      |      |
|--------------------|-------|----------------------------------|------|------|
| <b>Prestw-1158</b> | 08B09 | Ropinirole HCl                   | 0.95 | 1.28 |
| <b>Prestw-1297</b> | 08B10 | Lacidipine                       | 1.04 | 1.22 |
| <b>Prestw-1228</b> | 08B11 | Argatroban                       | 0.93 | 1.46 |
| <b>Prestw-1328</b> | 08C02 | Reboxetine mesylate              | 0.98 | 1.07 |
| <b>Prestw-582</b>  | 08C03 | Lobelanidine hydrochloride       | 0.95 | 1.26 |
| <b>Prestw-583</b>  | 08C04 | Papaverine hydrochloride         | 0.83 | 1.11 |
| <b>Prestw-584</b>  | 08C05 | Yohimbine hydrochloride          | 1.02 | 1.14 |
| <b>Prestw-585</b>  | 08C06 | Lobeline alpha (-) hydrochloride | 0.93 | 1.02 |
| <b>Prestw-1211</b> | 08C07 | Alfacalcidol                     | 1.00 | 1.09 |
| <b>Prestw-587</b>  | 08C08 | Cilostazol                       | 0.97 | 0.99 |
| <b>Prestw-588</b>  | 08C09 | Galanthamine hydrobromide        | 0.98 | 1.13 |
| <b>Prestw-1130</b> | 08C10 | Azelastine HCl                   | 0.95 | 1.04 |
| <b>Prestw-1409</b> | 08C11 | Etretinate                       | 1.01 | 1.34 |
| <b>Prestw-1274</b> | 08D02 | Emedastine                       | 1.09 | 1.28 |
| <b>Prestw-1407</b> | 08D03 | Etofenamate                      | 0.81 | 1.28 |
| <b>Prestw-1369</b> | 08D04 | Zaleplon                         | 0.96 | 1.24 |
| <b>Prestw-594</b>  | 08D05 | Diclofenac sodium                | 1.04 | 1.17 |
| <b>Prestw-1410</b> | 08D06 | Exemestane                       | 0.93 | 1.09 |
| <b>Prestw-596</b>  | 08D07 | Convolamine hydrochloride        | 0.99 | 0.97 |
| <b>Prestw-1183</b> | 08D08 | Temozolomide                     | 0.97 | 1.10 |
| <b>Prestw-598</b>  | 08D09 | Xylazine                         | 1.02 | 1.22 |
| <b>Prestw-1132</b> | 08D10 | Celiprolol HCl                   | 1.00 | 1.11 |
| <b>Prestw-1367</b> | 08D11 | Zopiclone                        | 0.97 | 1.18 |

|                    |       |                                   |      |      |
|--------------------|-------|-----------------------------------|------|------|
| <b>Prestw-1198</b> | 08E02 | Tranilast                         | 0.91 | 1.16 |
| <b>Prestw-1182</b> | 08E03 | Tizanidine HCl                    | 1.03 | 1.42 |
| <b>Prestw-1364</b> | 08E04 | Zafirlukast                       | 0.94 | 1.54 |
| <b>Prestw-1252</b> | 08E05 | Butenafine                        | 0.93 | 1.14 |
| <b>Prestw-1121</b> | 08E06 | Carbadox                          | 0.99 | 1.09 |
| <b>Prestw-1331</b> | 08E07 | Rimantadine                       | 0.99 | 0.98 |
| <b>Prestw-607</b>  | 08E08 | Eburnamonine (-)                  | 0.96 | 1.22 |
| <b>Prestw-1460</b> | 08E09 | Oxibendazol                       | 1.04 | 1.23 |
| <b>Prestw-1292</b> | 08E10 | Ipsapirone                        | 0.96 | 1.29 |
| <b>Prestw-610</b>  | 08E11 | Harmaline hydrochloride dihydrate | 0.97 | 1.11 |
| <b>Prestw-611</b>  | 08F02 | Harmalol hydrochloride dihydrate  | 0.94 | 1.23 |
| <b>Prestw-612</b>  | 08F03 | Harmol hydrochloride monohydrate  | 1.01 | 1.30 |
| <b>Prestw-613</b>  | 08F04 | Harmine hydrochloride             | 0.88 | 1.10 |
| <b>Prestw-1177</b> | 08F05 | Carbidopa                         | 0.93 | 1.08 |
| <b>Prestw-615</b>  | 08F06 | Chrysene-1,4-quinone              | 1.00 | 1.06 |
| <b>Prestw-616</b>  | 08F07 | Demecarium bromide                | 0.99 | 1.07 |
| <b>Prestw-617</b>  | 08F08 | Quipazine dimaleate salt          | 1.01 | 1.14 |
| <b>Prestw-1127</b> | 08F09 | Acipimox                          | 0.98 | 1.17 |
| <b>Prestw-619</b>  | 08F10 | Diflorasone Diacetate             | 1.01 | 1.40 |
| <b>Prestw-620</b>  | 08F11 | Harmane hydrochloride             | 0.98 | 1.22 |
| <b>Prestw-621</b>  | 08G02 | Methoxy-6-harmalan                | 0.85 | 1.05 |
| <b>Prestw-1217</b> | 08G03 | Amisulpride                       | 0.94 | 1.19 |
| <b>Prestw-623</b>  | 08G04 | Pyridoxine hydrochloride          | 0.93 | 1.23 |

|                    |       |                                      |      |      |
|--------------------|-------|--------------------------------------|------|------|
| <b>Prestw-1469</b> | 08G05 | Mercaptopurine                       | 0.91 | 1.03 |
| <b>Prestw-1134</b> | 08G06 | Cytarabine                           | 0.91 | 0.90 |
| <b>Prestw-626</b>  | 08G07 | Racecadotril                         | 0.89 | 1.08 |
| <b>Prestw-627</b>  | 08G08 | Folic acid                           | 0.97 | 1.01 |
| <b>Prestw-1129</b> | 08G09 | Benazepril HCl                       | 0.92 | 1.40 |
| <b>Prestw-1178</b> | 08G10 | Aniracetam                           | 0.92 | 1.27 |
| <b>Prestw-630</b>  | 08G11 | Dimethisoquin hydrochloride          | 0.92 | 1.45 |
| <b>Prestw-1210</b> | 08H02 | Alendronate sodium                   | 0.91 | 1.03 |
| <b>Prestw-632</b>  | 08H03 | Dipivefrin hydrochloride             | 0.88 | 1.00 |
| <b>Prestw-633</b>  | 08H04 | Thiorphan                            | 0.88 | 1.07 |
| <b>Prestw-1463</b> | 08H05 | Tomoxetine hydrochloride             | 0.83 | 0.83 |
| <b>Prestw-1299</b> | 08H06 | Lapatinib ditosylate                 | 0.94 | 1.08 |
| <b>Prestw-1488</b> | 08H07 | Penciclovir                          | 0.87 | 1.12 |
| <b>Prestw-1427</b> | 08H08 | Levetiracetam                        | 0.94 | 1.02 |
| <b>Prestw-1392</b> | 08H09 | Dexfenfluramine hydrochloride        | 0.88 | 1.27 |
| <b>Prestw-1408</b> | 08H10 | Etoricoxib                           | 0.90 | 1.19 |
| <b>Prestw-1341</b> | 08H11 | Sertindole                           | 0.86 | 0.67 |
| <b>Plate 9</b>     |       |                                      |      |      |
| <b>Prestw-641</b>  | 09A02 | Sulmazole                            | 0.86 | 1.07 |
| <b>Prestw-1270</b> | 09A03 | Gefitinib                            | 0.87 | 0.96 |
| <b>Prestw-643</b>  | 09A04 | Flunisolide                          | 0.93 | 0.99 |
| <b>Prestw-644</b>  | 09A05 | N-Acetyl-DL-homocysteine Thiolactone | 0.90 | 1.00 |
| <b>Prestw-645</b>  | 09A06 | Flurandrenolide                      | 0.89 | 1.14 |

|                    |       |                          |      |      |
|--------------------|-------|--------------------------|------|------|
| <b>Prestw-1125</b> | 09A07 | Oxiconazole Nitrate      | 0.89 | 0.87 |
| <b>Prestw-1166</b> | 09A08 | Rebamipide               | 0.89 | 1.02 |
| <b>Prestw-1154</b> | 09A09 | Nilvadipine              | 0.81 | 1.21 |
| <b>Prestw-649</b>  | 09A10 | Etanidazole              | 0.81 | 1.24 |
| <b>Prestw-650</b>  | 09A11 | Butirosin disulfate salt | 0.88 | 1.60 |
| <b>Prestw-651</b>  | 09B02 | Glimepiride              | 0.82 | 0.94 |
| <b>Prestw-652</b>  | 09B03 | Picrotoxinin             | 0.92 | 0.99 |
| <b>Prestw-653</b>  | 09B04 | Mepenzolate bromide      | 0.90 | 1.09 |
| <b>Prestw-654</b>  | 09B05 | Benfotiamine             | 0.87 | 1.00 |
| <b>Prestw-655</b>  | 09B06 | Halcinonide              | 0.87 | 1.05 |
| <b>Prestw-656</b>  | 09B07 | Lanatoside C             | 0.92 | 0.71 |
| <b>Prestw-657</b>  | 09B08 | Benzamil hydrochloride   | 0.93 | 0.78 |
| <b>Prestw-658</b>  | 09B09 | Suxibuzone               | 0.84 | 1.20 |
| <b>Prestw-659</b>  | 09B10 | 6-Furfurylaminopurine    | 0.87 | 1.10 |
| <b>Prestw-660</b>  | 09B11 | Avermectin B1a           | 0.85 | 1.16 |
| <b>Prestw-1317</b> | 09C02 | Pranlukast               | 0.88 | 0.97 |
| <b>Prestw-1477</b> | 09C03 | Penicillamine            | 0.91 | 1.12 |
| <b>Prestw-1365</b> | 09C04 | Zileuton                 | 0.91 | 0.98 |
| <b>Prestw-1432</b> | 09C05 | Loratadine               | 0.85 | 0.96 |
| <b>Prestw-1201</b> | 09C06 | Clindamycin Phosphate    | 0.89 | 1.06 |
| <b>Prestw-666</b>  | 09C07 | Nisoldipine              | 0.84 | 0.84 |
| <b>Prestw-667</b>  | 09C08 | Foliosidine              | 0.92 | 0.83 |
| <b>Prestw-1165</b> | 09C09 | Acitretin                | 0.87 | 1.08 |

|                    |       |                                  |      |      |
|--------------------|-------|----------------------------------|------|------|
| <b>Prestw-1162</b> | 09C10 | Zonisamide                       | 0.95 | 1.27 |
| <b>Prestw-1173</b> | 09C11 | Irsogladine Maleate              | 0.90 | 1.06 |
| <b>Prestw-671</b>  | 09D02 | Dydrogesterone                   | 0.93 | 1.19 |
| <b>Prestw-1346</b> | 09D03 | Sumatriptan succinate            | 0.88 | 1.21 |
| <b>Prestw-1456</b> | 09D04 | Opipramol dihydrochloride        | 0.82 | 0.86 |
| <b>Prestw-1447</b> | 09D05 | Nalidixic acid sodium salt       | 0.94 | 1.05 |
| <b>Prestw-1475</b> | 09D06 | Oxacillin Na                     | 0.96 | 1.05 |
| <b>Prestw-676</b>  | 09D07 | Beta-Escin                       | 0.91 | 0.97 |
| <b>Prestw-1496</b> | 09D08 | Tiludronate disodium             | 0.91 | 0.90 |
| <b>Prestw-1349</b> | 09D09 | Tazobactam                       | 0.87 | 1.15 |
| <b>Prestw-1285</b> | 09D10 | Ibandronate                      | 0.93 | 1.02 |
| <b>Prestw-1363</b> | 09D11 | Warfarin                         | 0.98 | 1.16 |
| <b>Prestw-1318</b> | 09E02 | Pranoprofen                      | 0.91 | 1.14 |
| <b>Prestw-1340</b> | 09E03 | Secnidazole                      | 0.93 | 1.21 |
| <b>Prestw-683</b>  | 09E04 | Pempidine tartrate               | 0.97 | 1.33 |
| <b>Prestw-1381</b> | 09E05 | Clodronate                       | 0.92 | 1.14 |
| <b>Prestw-685</b>  | 09E06 | Nitrarine dihydrochloride        | 0.98 | 0.83 |
| <b>Prestw-1194</b> | 09E07 | Thimerosal                       | 0.95 | 0.25 |
| <b>Prestw-1465</b> | 09E08 | Tramadol hydrochloride           | 0.96 | 0.97 |
| <b>Prestw-688</b>  | 09E09 | Estropipate                      | 0.96 | 1.04 |
| <b>Prestw-1253</b> | 09E10 | Butylscopolammonium (n-) bromide | 0.93 | 1.08 |
| <b>Prestw-1494</b> | 09E11 | Irinotecan Hydrochloride         | 0.94 | 1.02 |
| <b>Prestw-1353</b> | 09F02 | Tylosin                          | 1.00 | 1.09 |

|                    |       |                                         |      |      |
|--------------------|-------|-----------------------------------------|------|------|
| <b>Prestw-692</b>  | 09F03 | Citalopram Hydrobromide                 | 0.96 | 1.12 |
| <b>Prestw-693</b>  | 09F04 | Promazine hydrochloride                 | 0.99 | 0.83 |
| <b>Prestw-694</b>  | 09F05 | Sulfamerazine                           | 0.97 | 1.05 |
| <b>Prestw-1170</b> | 09F06 | Venlafaxine                             | 1.03 | 0.99 |
| <b>Prestw-696</b>  | 09F07 | Ethotoin                                | 1.01 | 1.03 |
| <b>Prestw-697</b>  | 09F08 | 3-alpha-Hydroxy-5-beta-androstan-17-one | 0.91 | 1.15 |
| <b>Prestw-698</b>  | 09F09 | Tetrahydrozoline hydrochloride          | 0.96 | 1.21 |
| <b>Prestw-699</b>  | 09F10 | Hexestrol                               | 1.00 | 1.32 |
| <b>Prestw-700</b>  | 09F11 | Cefmetazole sodium salt                 | 0.96 | 1.07 |
| <b>Prestw-701</b>  | 09G02 | Trihexyphenidyl-D,L Hydrochloride       | 0.91 | 1.06 |
| <b>Prestw-702</b>  | 09G03 | Succinylsulfathiazole                   | 0.88 | 0.98 |
| <b>Prestw-703</b>  | 09G04 | Famprofazone                            | 0.86 | 1.00 |
| <b>Prestw-704</b>  | 09G05 | Bromopride                              | 1.03 | 0.99 |
| <b>Prestw-705</b>  | 09G06 | Methyl benzethonium chloride            | 1.32 | 1.07 |
| <b>Prestw-706</b>  | 09G07 | Chlorcyclizine hydrochloride            | 0.77 | 0.84 |
| <b>Prestw-707</b>  | 09G08 | Diphenylpyraline hydrochloride          | 0.88 | 0.90 |
| <b>Prestw-708</b>  | 09G09 | Benzethonium chloride                   | 1.09 | 1.14 |
| <b>Prestw-709</b>  | 09G10 | Trioxsalen                              | 0.96 | 1.14 |
| <b>Prestw-1136</b> | 09G11 | Doxofylline                             | 0.93 | 1.18 |
| <b>Prestw-711</b>  | 09H02 | Sulfabenzamide                          | 0.88 | 0.91 |
| <b>Prestw-712</b>  | 09H03 | Benzocaine                              | 0.87 | 0.94 |
| <b>Prestw-713</b>  | 09H04 | Dipyron                                 | 0.92 | 1.00 |
| <b>Prestw-714</b>  | 09H05 | Isosorbide dinitrate                    | 0.90 | 0.81 |

|                    |       |                                    |      |      |
|--------------------|-------|------------------------------------|------|------|
| <b>Prestw-715</b>  | 09H06 | Sulfachloropyridazine              | 0.85 | 0.88 |
| <b>Prestw-716</b>  | 09H07 | Pramoxine hydrochloride            | 0.94 | 1.01 |
| <b>Prestw-717</b>  | 09H08 | Finasteride                        | 0.88 | 0.97 |
| <b>Prestw-718</b>  | 09H09 | Fluorometholone                    | 0.88 | 1.08 |
| <b>Prestw-719</b>  | 09H10 | Cephalothin sodium salt            | 0.88 | 1.08 |
| <b>Prestw-720</b>  | 09H11 | Cefuroxime sodium salt             | 0.90 | 1.11 |
| <b>Plate 10</b>    |       |                                    |      |      |
| <b>Prestw-721</b>  | 10A02 | Althiazide                         | 1.01 | 0.97 |
| <b>Prestw-722</b>  | 10A03 | Isopyrin hydrochloride             | 1.02 | 0.99 |
| <b>Prestw-723</b>  | 10A04 | Phenethicillin potassium salt      | 1.01 | 0.97 |
| <b>Prestw-724</b>  | 10A05 | Sulfamethoxypyridazine             | 0.95 | 0.87 |
| <b>Prestw-725</b>  | 10A06 | Deferoxamine mesylate              | 0.96 | 0.91 |
| <b>Prestw-726</b>  | 10A07 | Mephentermine hemisulfate          | 0.83 | 0.96 |
| <b>Prestw-1140</b> | 10A08 | Liranaftate                        | 0.93 | 0.99 |
| <b>Prestw-728</b>  | 10A09 | Sulfadimethoxine                   | 0.89 | 0.88 |
| <b>Prestw-729</b>  | 10A10 | Sulfanilamide                      | 0.80 | 0.94 |
| <b>Prestw-730</b>  | 10A11 | Balsalazide Sodium                 | 0.84 | 0.95 |
| <b>Prestw-731</b>  | 10B02 | Sulfaquinoxaline sodium salt       | 0.94 | 1.00 |
| <b>Prestw-732</b>  | 10B03 | Streptozotocin                     | 0.99 | 1.09 |
| <b>Prestw-733</b>  | 10B04 | Metoprolol-(+,-) (+)-tartrate salt | 1.01 | 1.04 |
| <b>Prestw-734</b>  | 10B05 | Flumethasone                       | 0.92 | 1.08 |
| <b>Prestw-735</b>  | 10B06 | Flecainide acetate                 | 0.99 | 1.02 |
| <b>Prestw-736</b>  | 10B07 | Cefazolin sodium salt              | 0.92 | 1.04 |

|                   |       |                                   |      |      |
|-------------------|-------|-----------------------------------|------|------|
| <b>Prestw-737</b> | 10B08 | Atractyloside potassium salt      | 0.90 | 1.11 |
| <b>Prestw-738</b> | 10B09 | Folinic acid calcium salt         | 0.92 | 0.99 |
| <b>Prestw-739</b> | 10B10 | Levonordefrin                     | 0.90 | 1.02 |
| <b>Prestw-740</b> | 10B11 | Ebselen                           | 0.91 | 1.15 |
| <b>Prestw-741</b> | 10C02 | Nadide                            | 0.89 | 1.11 |
| <b>Prestw-742</b> | 10C03 | Sulfamethizole                    | 0.93 | 1.09 |
| <b>Prestw-743</b> | 10C04 | Medrysone                         | 0.93 | 1.03 |
| <b>Prestw-744</b> | 10C05 | Flunixin meglumine                | 0.92 | 1.02 |
| <b>Prestw-745</b> | 10C06 | Spiramycin                        | 0.98 | 1.08 |
| <b>Prestw-746</b> | 10C07 | Glycopyrrolate                    | 1.01 | 1.09 |
| <b>Prestw-747</b> | 10C08 | Cefamandole sodium salt           | 0.90 | 1.02 |
| <b>Prestw-748</b> | 10C09 | Monensin sodium salt              | 0.97 | 1.19 |
| <b>Prestw-749</b> | 10C10 | Isoetharine mesylate salt         | 0.85 | 1.03 |
| <b>Prestw-750</b> | 10C11 | Mevalonic-D, L acid lactone       | 0.91 | 1.08 |
| <b>Prestw-751</b> | 10D02 | Terazosin hydrochloride           | 0.87 | 1.10 |
| <b>Prestw-752</b> | 10D03 | Phenazopyridine hydrochloride     | 0.86 | 1.05 |
| <b>Prestw-753</b> | 10D04 | Demeclocycline hydrochloride      | 0.90 | 1.00 |
| <b>Prestw-754</b> | 10D05 | Fenoprofen calcium salt dihydrate | 0.93 | 1.05 |
| <b>Prestw-755</b> | 10D06 | Piperacillin sodium salt          | 0.95 | 1.11 |
| <b>Prestw-756</b> | 10D07 | Diethylstilbestrol                | 0.90 | 1.01 |
| <b>Prestw-757</b> | 10D08 | Chlorotrianisene                  | 0.90 | 1.04 |
| <b>Prestw-758</b> | 10D09 | Ribostamycin sulfate salt         | 0.88 | 0.95 |
| <b>Prestw-759</b> | 10D10 | Methacholine chloride             | 0.93 | 0.94 |



|                   |       |                             |       |      |
|-------------------|-------|-----------------------------|-------|------|
| <b>Prestw-760</b> | 10D11 | Pipenzolate bromide         | 0.81  | 0.96 |
| <b>Prestw-761</b> | 10E02 | Butamben                    | 0.87  | 1.08 |
| <b>Prestw-762</b> | 10E03 | Sulfapyridine               | 0.89  | 0.98 |
| <b>Prestw-763</b> | 10E04 | Meclofenoxate hydrochloride | 0.92  | 1.14 |
| <b>Prestw-764</b> | 10E05 | Furaltadone hydrochloride   | 0.92  | 0.96 |
| <b>Prestw-765</b> | 10E06 | Ethoxyquin                  | 0.83  | 0.92 |
| <b>Prestw-766</b> | 10E07 | Tinidazole                  | 0.91  | 1.06 |
| <b>Prestw-767</b> | 10E08 | Guanadrel sulfate           | 0.88  | 0.96 |
| <b>Prestw-768</b> | 10E09 | Vidarabine                  | 0.91  | 1.01 |
| <b>Prestw-769</b> | 10E10 | Sulfameter                  | 0.86  | 0.88 |
| <b>Prestw-770</b> | 10E11 | Isopropamide iodide         | 0.88  | 0.96 |
| <b>Prestw-771</b> | 10F02 | Alclometasone dipropionate  | 0.85  | 1.15 |
| <b>Prestw-772</b> | 10F03 | Leflunomide                 | 0.85  | 0.94 |
| <b>Prestw-773</b> | 10F04 | Norgestrel(-)-D             | 0.85  | 0.96 |
| <b>Prestw-774</b> | 10F05 | Fluocinonide                | 0.91  | 1.14 |
| <b>Prestw-775</b> | 10F06 | Sulfamethazine sodium salt  | 0.88  | 1.06 |
| <b>Prestw-776</b> | 10F07 | Guaiifenesin                | 0.96  | 1.04 |
| <b>Prestw-777</b> | 10F08 | Alexidine dihydrochloride   | 16.01 | 6.74 |
| <b>Prestw-778</b> | 10F09 | Proadifen hydrochloride     | 0.81  | 0.95 |
| <b>Prestw-779</b> | 10F10 | Zomepirac sodium salt       | 0.81  | 0.95 |
| <b>Prestw-780</b> | 10F11 | Cinoxacin                   | 0.79  | 1.02 |
| <b>Prestw-781</b> | 10G02 | Clobetasol propionate       | 0.85  | 1.02 |
| <b>Prestw-782</b> | 10G03 | Podophyllotoxin             | 0.94  | 0.68 |

|                   |       |                                |      |      |
|-------------------|-------|--------------------------------|------|------|
| <b>Prestw-783</b> | 10G04 | Clofibrac acid                 | 0.84 | 1.03 |
| <b>Prestw-784</b> | 10G05 | Bendroflumethiazide            | 0.88 | 1.04 |
| <b>Prestw-785</b> | 10G06 | Dicumarol                      | 0.91 | 1.11 |
| <b>Prestw-786</b> | 10G07 | Methimazole                    | 0.84 | 0.93 |
| <b>Prestw-787</b> | 10G08 | Merbromin                      | 0.74 | 0.89 |
| <b>Prestw-788</b> | 10G09 | Hexylcaine hydrochloride       | 0.81 | 1.00 |
| <b>Prestw-789</b> | 10G10 | Drofenine hydrochloride        | 0.78 | 0.97 |
| <b>Prestw-790</b> | 10G11 | Cycloheximide                  | 0.80 | 0.99 |
| <b>Prestw-791</b> | 10H02 | (R) -Naproxen sodium salt      | 0.77 | 0.93 |
| <b>Prestw-792</b> | 10H03 | Propidium iodide               | 0.74 | 0.85 |
| <b>Prestw-793</b> | 10H04 | Cloperastine hydrochloride     | 0.82 | 0.80 |
| <b>Prestw-794</b> | 10H05 | Eucatropine hydrochloride      | 0.80 | 0.82 |
| <b>Prestw-795</b> | 10H06 | Isocarboxazid                  | 0.83 | 0.79 |
| <b>Prestw-796</b> | 10H07 | Lithocholic acid               | 0.78 | 0.78 |
| <b>Prestw-797</b> | 10H08 | Methotrimeprazine maleate salt | 0.84 | 0.81 |
| <b>Prestw-798</b> | 10H09 | Dienestrol                     | 0.84 | 0.86 |
| <b>Prestw-799</b> | 10H10 | Pridinol methanesulfonate salt | 0.78 | 0.95 |
| <b>Prestw-800</b> | 10H11 | Amrinone                       | 0.77 | 0.96 |
| <b>Plate 11</b>   |       |                                |      |      |
| <b>Prestw-801</b> | 11A02 | Carbinoxamine maleate salt     | 0.91 | 1.04 |
| <b>Prestw-802</b> | 11A03 | Methazolamide                  | 0.99 | 1.00 |
| <b>Prestw-803</b> | 11A04 | Pyrithyldione                  | 1.01 | 1.12 |
| <b>Prestw-804</b> | 11A05 | Spectinomycin dihydrochloride  | 0.99 | 0.99 |

|                    |       |                              |      |      |
|--------------------|-------|------------------------------|------|------|
| <b>Prestw-805</b>  | 11A06 | Piromidic acid               | 1.01 | 1.09 |
| <b>Prestw-806</b>  | 11A07 | Trimipramine maleate salt    | 0.91 | 0.95 |
| <b>Prestw-807</b>  | 11A08 | Chloropyramine hydrochloride | 0.95 | 1.04 |
| <b>Prestw-808</b>  | 11A09 | Furazolidone                 | 0.97 | 1.12 |
| <b>Prestw-809</b>  | 11A10 | Dichlorphenamide             | 0.92 | 1.26 |
| <b>Prestw-810</b>  | 11A11 | Sulconazole nitrate          | 1.02 | 1.18 |
| <b>Prestw-1233</b> | 11B02 | Auranofin                    | 1.02 | 0.49 |
| <b>Prestw-812</b>  | 11B03 | Cromolyn disodium salt       | 0.98 | 0.87 |
| <b>Prestw-813</b>  | 11B04 | Bucladesine sodium salt      | 0.94 | 0.88 |
| <b>Prestw-814</b>  | 11B05 | Cefsulodin sodium salt       | 0.96 | 0.84 |
| <b>Prestw-815</b>  | 11B06 | Fosfosal                     | 0.96 | 1.10 |
| <b>Prestw-816</b>  | 11B07 | Suprofen                     | 0.92 | 1.03 |
| <b>Prestw-817</b>  | 11B08 | Catechin-(+,-) hydrate       | 0.92 | 1.08 |
| <b>Prestw-818</b>  | 11B09 | Nadolol                      | 0.94 | 1.19 |
| <b>Prestw-819</b>  | 11B10 | Moxalactam disodium salt     | 1.03 | 1.16 |
| <b>Prestw-820</b>  | 11B11 | Aminophylline                | 0.97 | 0.99 |
| <b>Prestw-821</b>  | 11C02 | Azlocillin sodium salt       | 0.98 | 1.07 |
| <b>Prestw-822</b>  | 11C03 | Clidinium bromide            | 0.94 | 0.96 |
| <b>Prestw-823</b>  | 11C04 | Sulfamonomethoxine           | 0.99 | 0.99 |
| <b>Prestw-824</b>  | 11C05 | Benzthiazide                 | 1.01 | 1.03 |
| <b>Prestw-825</b>  | 11C06 | Trichlormethiazide           | 0.97 | 1.23 |
| <b>Prestw-826</b>  | 11C07 | Oxalamine citrate salt       | 0.92 | 1.18 |
| <b>Prestw-827</b>  | 11C08 | Propantheline bromide        | 0.94 | 1.19 |

|                    |       |                                      |      |      |
|--------------------|-------|--------------------------------------|------|------|
| <b>Prestw-1361</b> | 11C09 | Viloxazine hydrochloride             | 0.98 | 0.99 |
| <b>Prestw-829</b>  | 11C10 | Dimethadione                         | 0.92 | 1.01 |
| <b>Prestw-830</b>  | 11C11 | Ethaverine hydrochloride             | 0.89 | 0.93 |
| <b>Prestw-831</b>  | 11D02 | Butacaine                            | 0.93 | 0.97 |
| <b>Prestw-832</b>  | 11D03 | Cefoxitin sodium salt                | 0.96 | 0.99 |
| <b>Prestw-833</b>  | 11D04 | Ifosfamide                           | 0.95 | 1.11 |
| <b>Prestw-834</b>  | 11D05 | Novobiocin sodium salt               | 0.85 | 1.09 |
| <b>Prestw-835</b>  | 11D06 | Tetrahydroxy-1,4-quinone monohydrate | 1.03 | 1.19 |
| <b>Prestw-836</b>  | 11D07 | Indoprofen                           | 0.83 | 1.26 |
| <b>Prestw-837</b>  | 11D08 | Carbenoxolone disodium salt          | 0.90 | 1.01 |
| <b>Prestw-838</b>  | 11D09 | Iocetamic acid                       | 0.93 | 1.13 |
| <b>Prestw-839</b>  | 11D10 | Ganciclovir                          | 0.89 | 1.20 |
| <b>Prestw-840</b>  | 11D11 | Ethopropazine hydrochloride          | 0.94 | 0.78 |
| <b>Prestw-1455</b> | 11E02 | Olanzapine                           | 0.95 | 0.88 |
| <b>Prestw-842</b>  | 11E03 | Trimeprazine tartrate                | 0.85 | 0.63 |
| <b>Prestw-843</b>  | 11E04 | Nafcillin sodium salt monohydrate    | 0.85 | 1.07 |
| <b>Prestw-844</b>  | 11E05 | Procyclidine hydrochloride           | 0.86 | 0.95 |
| <b>Prestw-845</b>  | 11E06 | Amiprilose hydrochloride             | 0.92 | 1.10 |
| <b>Prestw-846</b>  | 11E07 | Ethinylestradiol 3-methyl ether      | 0.97 | 1.05 |
| <b>Prestw-847</b>  | 11E08 | (-) -Levobunolol hydrochloride       | 0.91 | 1.06 |
| <b>Prestw-848</b>  | 11E09 | Iodixanol                            | 0.90 | 1.10 |
| <b>Prestw-849</b>  | 11E10 | Rolitetracycline                     | 0.78 | 0.97 |
| <b>Prestw-850</b>  | 11E11 | Equilin                              | 0.90 | 0.87 |

|                    |       |                                |      |      |
|--------------------|-------|--------------------------------|------|------|
| <b>Prestw-851</b>  | 11F02 | Paroxetine Hydrochloride       | 0.95 | 0.78 |
| <b>Prestw-1454</b> | 11F03 | Nylidrin                       | 0.89 | 0.91 |
| <b>Prestw-853</b>  | 11F04 | Liothyronine                   | 0.87 | 1.07 |
| <b>Prestw-854</b>  | 11F05 | Roxithromycin                  | 0.91 | 1.01 |
| <b>Prestw-855</b>  | 11F06 | Beclomethasone dipropionate    | 0.89 | 1.16 |
| <b>Prestw-856</b>  | 11F07 | Tolmetin sodium salt dihydrate | 0.97 | 1.11 |
| <b>Prestw-857</b>  | 11F08 | (+) -Levobunolol hydrochloride | 0.97 | 1.10 |
| <b>Prestw-858</b>  | 11F09 | Doxazosin mesylate             | 0.87 | 0.92 |
| <b>Prestw-859</b>  | 11F10 | Fluvastatin sodium salt        | 0.88 | 0.98 |
| <b>Prestw-860</b>  | 11F11 | Methylhydantoin-5-(L)          | 0.91 | 0.87 |
| <b>Prestw-861</b>  | 11G02 | Gabapentin                     | 0.84 | 0.94 |
| <b>Prestw-862</b>  | 11G03 | Raloxifene hydrochloride       | 0.89 | 0.82 |
| <b>Prestw-863</b>  | 11G04 | Etidronic acid, disodium salt  | 0.92 | 0.91 |
| <b>Prestw-864</b>  | 11G05 | Methylhydantoin-5-(D)          | 0.88 | 1.04 |
| <b>Prestw-865</b>  | 11G06 | Simvastatin                    | 0.88 | 0.94 |
| <b>Prestw-866</b>  | 11G07 | Azacytidine-5                  | 0.86 | 0.91 |
| <b>Prestw-867</b>  | 11G08 | Paromomycin sulfate            | 0.83 | 1.10 |
| <b>Prestw-868</b>  | 11G09 | Acetaminophen                  | 0.89 | 1.04 |
| <b>Prestw-869</b>  | 11G10 | Phthalylsulfathiazole          | 0.87 | 0.97 |
| <b>Prestw-870</b>  | 11G11 | Luteolin                       | 0.81 | 0.96 |
| <b>Prestw-871</b>  | 11H02 | Iopamidol                      | 0.88 | 1.11 |
| <b>Prestw-872</b>  | 11H03 | Iopromide                      | 0.82 | 1.10 |
| <b>Prestw-873</b>  | 11H04 | Theophylline monohydrate       | 0.86 | 0.94 |

|                    |       |                            |      |      |
|--------------------|-------|----------------------------|------|------|
| <b>Prestw-874</b>  | 11H05 | Theobromine                | 0.90 | 0.97 |
| <b>Prestw-875</b>  | 11H06 | Reserpine                  | 0.81 | 0.76 |
| <b>Prestw-1239</b> | 11H07 | Bicalutamide               | 0.84 | 0.90 |
| <b>Prestw-877</b>  | 11H08 | Scopolamine hydrochloride  | 0.88 | 0.89 |
| <b>Prestw-878</b>  | 11H09 | Ioversol                   | 0.84 | 0.96 |
| <b>Prestw-1495</b> | 11H10 | Rabeprazole                | 0.79 | 0.93 |
| <b>Prestw-880</b>  | 11H11 | Carbachol                  | 0.91 | 0.97 |
| <i>Plate 12</i>    |       |                            |      |      |
| <b>Prestw-881</b>  | 12A02 | Niacin                     | 1.03 | 1.17 |
| <b>Prestw-882</b>  | 12A03 | Bemegride                  | 1.04 | 1.14 |
| <b>Prestw-883</b>  | 12A04 | Digoxigenin                | 1.03 | 0.86 |
| <b>Prestw-884</b>  | 12A05 | Meglumine                  | 0.98 | 1.11 |
| <b>Prestw-885</b>  | 12A06 | Cantharidin                | 0.98 | 1.03 |
| <b>Prestw-886</b>  | 12A07 | Clioquinol                 | 0.93 | 1.18 |
| <b>Prestw-887</b>  | 12A08 | Oxybenzone                 | 0.94 | 1.14 |
| <b>Prestw-888</b>  | 12A09 | Promethazine hydrochloride | 0.89 | 1.03 |
| <b>Prestw-1167</b> | 12A10 | Diacerein                  | 0.94 | 1.06 |
| <b>Prestw-1137</b> | 12A11 | Esmolol hydrochloride      | 0.90 | 1.13 |
| <b>Prestw-1486</b> | 12B02 | Cortisol acetate           | 0.97 | 0.93 |
| <b>Prestw-1416</b> | 12B03 | Flubendazol                | 0.97 | 0.95 |
| <b>Prestw-893</b>  | 12B04 | Felbinac                   | 1.00 | 0.88 |
| <b>Prestw-894</b>  | 12B05 | Butylparaben               | 1.03 | 0.86 |
| <b>Prestw-895</b>  | 12B06 | Aminohippuric acid         | 0.91 | 0.90 |

|                   |       |                                       |      |      |
|-------------------|-------|---------------------------------------|------|------|
| <b>Prestw-896</b> | 12B07 | N-Acetyl-L-leucine                    | 1.02 | 0.92 |
| <b>Prestw-897</b> | 12B08 | Pipemidic acid                        | 0.98 | 0.95 |
| <b>Prestw-898</b> | 12B09 | Dioxybenzone                          | 0.95 | 0.79 |
| <b>Prestw-899</b> | 12B10 | Adrenosterone                         | 0.99 | 0.75 |
| <b>Prestw-900</b> | 12B11 | Methylatropine nitrate                | 1.00 | 0.98 |
| <b>Prestw-901</b> | 12C02 | Hymecromone                           | 0.96 | 0.97 |
| <b>Prestw-902</b> | 12C03 | Caffeic acid                          | 0.90 | 0.94 |
| <b>Prestw-903</b> | 12C04 | Diloxanide furoate                    | 0.95 | 0.94 |
| <b>Prestw-904</b> | 12C05 | Metyrapone                            | 0.93 | 0.91 |
| <b>Prestw-905</b> | 12C06 | Urapidil hydrochloride                | 0.96 | 0.89 |
| <b>Prestw-906</b> | 12C07 | Fluspirilen                           | 0.95 | 0.78 |
| <b>Prestw-907</b> | 12C08 | S-(+)-ibuprofen                       | 1.00 | 0.86 |
| <b>Prestw-908</b> | 12C09 | Ethynodiol diacetate                  | 0.99 | 0.82 |
| <b>Prestw-909</b> | 12C10 | Nabumetone                            | 0.96 | 0.74 |
| <b>Prestw-910</b> | 12C11 | Nisoxetine hydrochloride              | 0.96 | 0.83 |
| <b>Prestw-911</b> | 12D02 | (+)-Isoproterenol (+)-bitartrate salt | 0.98 | 0.88 |
| <b>Prestw-912</b> | 12D03 | Monobenzene                           | 0.90 | 0.82 |
| <b>Prestw-913</b> | 12D04 | 2-Aminobenzenesulfonamide             | 0.92 | 1.12 |
| <b>Prestw-914</b> | 12D05 | Estrone                               | 1.01 | 1.20 |
| <b>Prestw-915</b> | 12D06 | Lorglumide sodium salt                | 0.83 | 1.16 |
| <b>Prestw-916</b> | 12D07 | Nitrendipine                          | 0.82 | 0.67 |
| <b>Prestw-917</b> | 12D08 | Flurbiprofen                          | 0.82 | 0.87 |
| <b>Prestw-918</b> | 12D09 | Nimodipine                            | 0.87 | 0.81 |

|                    |       |                                  |      |      |
|--------------------|-------|----------------------------------|------|------|
| <b>Prestw-919</b>  | 12D10 | Bacitracin                       | 0.95 | 0.93 |
| <b>Prestw-920</b>  | 12D11 | L(-)-vesamicol hydrochloride     | 0.91 | 0.86 |
| <b>Prestw-921</b>  | 12E02 | Nizatidine                       | 0.91 | 0.96 |
| <b>Prestw-922</b>  | 12E03 | Thiopramide maleate              | 0.87 | 0.89 |
| <b>Prestw-923</b>  | 12E04 | Xamoterol hemifumarate           | 0.89 | 0.91 |
| <b>Prestw-924</b>  | 12E05 | Rolipram                         | 0.99 | 0.97 |
| <b>Prestw-925</b>  | 12E06 | Thonzonium bromide               | 1.36 | 0.89 |
| <b>Prestw-926</b>  | 12E07 | Idazoxan hydrochloride           | 0.97 | 0.84 |
| <b>Prestw-927</b>  | 12E08 | Quinapril HCl                    | 0.92 | 0.83 |
| <b>Prestw-928</b>  | 12E09 | Nilutamide                       | 0.91 | 0.90 |
| <b>Prestw-929</b>  | 12E10 | Ketorolac tromethamine           | 0.87 | 0.85 |
| <b>Prestw-930</b>  | 12E11 | Protriptyline hydrochloride      | 0.89 | 0.76 |
| <b>Prestw-931</b>  | 12F02 | Propofol                         | 0.87 | 0.94 |
| <b>Prestw-932</b>  | 12F03 | S(-)Eticlopride hydrochloride    | 0.97 | 0.89 |
| <b>Prestw-933</b>  | 12F04 | Primidone                        | 0.93 | 0.99 |
| <b>Prestw-934</b>  | 12F05 | Flucytosine                      | 0.91 | 1.04 |
| <b>Prestw-935</b>  | 12F06 | (-)-MK 801 hydrogen maleate      | 0.86 | 1.02 |
| <b>Prestw-936</b>  | 12F07 | Bephenium hydroxynaphthoate      | 0.97 | 0.86 |
| <b>Prestw-937</b>  | 12F08 | Dehydroisoandrosterone 3-acetate | 0.90 | 0.90 |
| <b>Prestw-938</b>  | 12F09 | Benserazide hydrochloride        | 0.91 | 0.84 |
| <b>Prestw-939</b>  | 12F10 | Iodipamide                       | 0.94 | 0.84 |
| <b>Prestw-1213</b> | 12F11 | Allopurinol                      | 0.95 | 0.81 |
| <b>Prestw-941</b>  | 12G02 | Pentetic acid                    | 0.91 | 1.00 |



|                    |       |                                |      |      |
|--------------------|-------|--------------------------------|------|------|
| <b>Prestw-942</b>  | 12G03 | Bretylum tosylate              | 0.88 | 0.95 |
| <b>Prestw-943</b>  | 12G04 | Pralidoxime chloride           | 0.85 | 0.93 |
| <b>Prestw-944</b>  | 12G05 | Phenoxybenzamine hydrochloride | 0.88 | 0.93 |
| <b>Prestw-945</b>  | 12G06 | Salmeterol                     | 0.86 | 0.80 |
| <b>Prestw-946</b>  | 12G07 | Altretamine                    | 0.88 | 0.83 |
| <b>Prestw-947</b>  | 12G08 | Prazosin hydrochloride         | 0.90 | 0.78 |
| <b>Prestw-948</b>  | 12G09 | Timolol maleate salt           | 0.96 | 0.84 |
| <b>Prestw-949</b>  | 12G10 | (+,-)-Octopamine hydrochloride | 0.89 | 0.80 |
| <b>Prestw-1279</b> | 12G11 | Stavudine                      | 0.92 | 0.89 |
| <b>Prestw-951</b>  | 12H02 | Crotamiton                     | 0.82 | 0.99 |
| <b>Prestw-1197</b> | 12H03 | Toremifene                     | 0.85 | 0.87 |
| <b>Prestw-536</b>  | 12H04 | (R)-(+)-Atenolol               | 0.86 | 1.03 |
| <b>Prestw-954</b>  | 12H05 | Tyloxapol                      | 0.88 | 1.03 |
| <b>Prestw-955</b>  | 12H06 | Florfenicol                    | 0.87 | 0.95 |
| <b>Prestw-956</b>  | 12H07 | Megestrol acetate              | 0.88 | 1.00 |
| <b>Prestw-957</b>  | 12H08 | Deoxycorticosterone            | 0.83 | 0.93 |
| <b>Prestw-958</b>  | 12H09 | Urosiol                        | 0.94 | 0.98 |
| <b>Prestw-959</b>  | 12H10 | Proparacaine hydrochloride     | 0.85 | 1.03 |
| <b>Prestw-960</b>  | 12H11 | Aminocaproic acid              | 0.90 | 0.84 |
| <b>Plate 13</b>    |       |                                |      |      |
| <b>Prestw-961</b>  | 13A02 | Denatonium benzoate            | 1.01 | 1.02 |
| <b>Prestw-1259</b> | 13A03 | Canrenone                      | 1.04 | 1.03 |
| <b>Prestw-963</b>  | 13A04 | Enilconazole                   | 1.02 | 1.08 |

|                    |       |                               |      |      |
|--------------------|-------|-------------------------------|------|------|
| <b>Prestw-964</b>  | 13A05 | Methacycline hydrochloride    | 0.98 | 1.03 |
| <b>Prestw-1415</b> | 13A06 | Floxuridine                   | 1.06 | 1.26 |
| <b>Prestw-966</b>  | 13A07 | Sotalol hydrochloride         | 0.98 | 1.26 |
| <b>Prestw-1267</b> | 13A08 | Gestrinone                    | 1.01 | 1.18 |
| <b>Prestw-968</b>  | 13A09 | Decamethonium bromide         | 1.01 | 1.26 |
| <b>Prestw-969</b>  | 13A10 | 3-Acetamidocoumarin           | 0.98 | 1.26 |
| <b>Prestw-970</b>  | 13A11 | Roxarsone                     | 0.92 | 1.21 |
| <b>Prestw-971</b>  | 13B02 | Remoxipride Hydrochloride     | 0.94 | 0.95 |
| <b>Prestw-972</b>  | 13B03 | THIP Hydrochloride            | 1.01 | 0.98 |
| <b>Prestw-973</b>  | 13B04 | Pirlindole mesylate           | 0.96 | 0.97 |
| <b>Prestw-974</b>  | 13B05 | Pronethalol hydrochloride     | 0.95 | 1.05 |
| <b>Prestw-975</b>  | 13B06 | Naftopidil dihydrochloride    | 0.96 | 1.06 |
| <b>Prestw-976</b>  | 13B07 | Tracazolate hydrochloride     | 0.97 | 1.04 |
| <b>Prestw-977</b>  | 13B08 | Zardaverine                   | 1.02 | 1.19 |
| <b>Prestw-978</b>  | 13B09 | Memantine Hydrochloride       | 0.96 | 1.29 |
| <b>Prestw-979</b>  | 13B10 | Ozagrel hydrochloride         | 1.00 | 1.10 |
| <b>Prestw-980</b>  | 13B11 | Piribedil hydrochloride       | 1.02 | 1.20 |
| <b>Prestw-981</b>  | 13C02 | Nitrocaramiphen hydrochloride | 0.91 | 0.97 |
| <b>Prestw-982</b>  | 13C03 | Nandrolone                    | 1.00 | 1.00 |
| <b>Prestw-983</b>  | 13C04 | Dimaprit dihydrochloride      | 0.99 | 1.08 |
| <b>Prestw-1459</b> | 13C05 | Oxfendazol                    | 1.03 | 1.05 |
| <b>Prestw-1268</b> | 13C06 | Guaiacol                      | 0.92 | 1.19 |
| <b>Prestw-986</b>  | 13C07 | Proscillaridin A              | 0.97 | 0.76 |

|                    |       |                              |      |      |
|--------------------|-------|------------------------------|------|------|
| <b>Prestw-1316</b> | 13C08 | Pramipexole                  | 0.97 | 1.21 |
| <b>Prestw-1452</b> | 13C09 | Norgestimate                 | 1.05 | 1.09 |
| <b>Prestw-1374</b> | 13C10 | Chlormadinone acetate        | 0.95 | 1.21 |
| <b>Prestw-1310</b> | 13C11 | Phenylbutazone               | 0.93 | 1.25 |
| <b>Prestw-991</b>  | 13D02 | Gliquidone                   | 0.90 | 1.04 |
| <b>Prestw-992</b>  | 13D03 | Pizotifen malate             | 0.92 | 0.82 |
| <b>Prestw-993</b>  | 13D04 | Ribavirin                    | 0.95 | 1.10 |
| <b>Prestw-994</b>  | 13D05 | Cyclopenthiiazide            | 0.95 | 1.10 |
| <b>Prestw-995</b>  | 13D06 | Fluvoxamine maleate          | 0.90 | 1.21 |
| <b>Prestw-1321</b> | 13D07 | Prothionamide                | 0.99 | 1.06 |
| <b>Prestw-997</b>  | 13D08 | Fluticasone propionate       | 0.93 | 1.20 |
| <b>Prestw-998</b>  | 13D09 | Zuclopenthixol hydrochloride | 0.97 | 0.60 |
| <b>Prestw-999</b>  | 13D10 | Proguanil hydrochloride      | 0.87 | 1.14 |
| <b>Prestw-1000</b> | 13D11 | Lymecycline                  | 0.91 | 1.16 |
| <b>Prestw-1001</b> | 13E02 | Alfadolone acetate           | 0.92 | 1.36 |
| <b>Prestw-1002</b> | 13E03 | Alfaxalone                   | 1.01 | 1.11 |
| <b>Prestw-1003</b> | 13E04 | Azapropazone                 | 0.91 | 1.21 |
| <b>Prestw-1004</b> | 13E05 | Meptazinol hydrochloride     | 0.93 | 1.17 |
| <b>Prestw-1005</b> | 13E06 | Apramycin                    | 0.97 | 1.25 |
| <b>Prestw-1006</b> | 13E07 | Epitiostanol                 | 0.97 | 1.18 |
| <b>Prestw-1007</b> | 13E08 | Fursultiamine Hydrochloride  | 0.90 | 1.22 |
| <b>Prestw-1008</b> | 13E09 | Gabexate mesilate            | 0.96 | 1.08 |
| <b>Prestw-1009</b> | 13E10 | Pivampicillin                | 1.01 | 1.17 |

|                    |       |                             |      |      |
|--------------------|-------|-----------------------------|------|------|
| <b>Prestw-1010</b> | 13E11 | Talampicillin hydrochloride | 0.87 | 1.26 |
| <b>Prestw-1011</b> | 13F02 | Flucloxacillin sodium       | 0.95 | 1.16 |
| <b>Prestw-1012</b> | 13F03 | Trapidil                    | 0.89 | 1.13 |
| <b>Prestw-1013</b> | 13F04 | Deptropine citrate          | 0.85 | 0.95 |
| <b>Prestw-1014</b> | 13F05 | Sertraline                  | 0.97 | 0.64 |
| <b>Prestw-1015</b> | 13F06 | Ethamsylate                 | 0.99 | 1.28 |
| <b>Prestw-1016</b> | 13F07 | Moxonidine                  | 0.96 | 1.28 |
| <b>Prestw-1017</b> | 13F08 | Etilefrine hydrochloride    | 1.01 | 1.21 |
| <b>Prestw-1018</b> | 13F09 | Alprostadil                 | 0.93 | 0.86 |
| <b>Prestw-1019</b> | 13F10 | Tribenoside                 | 0.94 | 1.27 |
| <b>Prestw-1020</b> | 13F11 | Rimexolone                  | 0.62 | 1.43 |
| <b>Prestw-1021</b> | 13G02 | Isradipine                  | 0.64 | 0.56 |
| <b>Prestw-1022</b> | 13G03 | Tiletamine hydrochloride    | 1.00 | 1.06 |
| <b>Prestw-1023</b> | 13G04 | Isometheptene mucate        | 0.92 | 1.20 |
| <b>Prestw-1024</b> | 13G05 | Nifurtimox                  | 0.94 | 1.16 |
| <b>Prestw-1025</b> | 13G06 | Letrozole                   | 0.87 | 1.20 |
| <b>Prestw-1026</b> | 13G07 | Arbutin                     | 0.84 | 1.21 |
| <b>Prestw-1027</b> | 13G08 | Tocainide hydrochloride     | 0.94 | 1.37 |
| <b>Prestw-1028</b> | 13G09 | Benzathine benzylpenicillin | 0.87 | 1.28 |
| <b>Prestw-1029</b> | 13G10 | Risperidone                 | 0.93 | 1.05 |
| <b>Prestw-1030</b> | 13G11 | Torseamide                  | 0.91 | 1.24 |
| <b>Prestw-1031</b> | 13H02 | Halofantrine hydrochloride  | 0.90 | 0.87 |
| <b>Prestw-1032</b> | 13H03 | Articaine hydrochloride     | 0.93 | 0.82 |

|                    |       |                             |      |      |
|--------------------|-------|-----------------------------|------|------|
| <b>Prestw-1033</b> | 13H04 | Nomegestrol acetate         | 0.91 | 0.87 |
| <b>Prestw-1034</b> | 13H05 | Pancuronium bromide         | 0.89 | 0.91 |
| <b>Prestw-1035</b> | 13H06 | Molindone hydrochloride     | 0.88 | 1.04 |
| <b>Prestw-1036</b> | 13H07 | Alcuronium chloride         | 0.88 | 1.10 |
| <b>Prestw-1037</b> | 13H08 | Zalcitabine                 | 0.93 | 1.24 |
| <b>Prestw-1038</b> | 13H09 | Methyldopate hydrochloride  | 0.91 | 1.27 |
| <b>Prestw-1039</b> | 13H10 | Levocabastine hydrochloride | 0.90 | 1.25 |
| <b>Prestw-1040</b> | 13H11 | Pyrvinium pamoate           | 0.96 | 1.39 |
| <i>Plate 14</i>    |       |                             |      |      |
| <b>Prestw-1041</b> | 14A02 | Etomidate                   | 1.04 | 0.90 |
| <b>Prestw-1042</b> | 14A03 | Tridihexethyl chloride      | 1.01 | 0.86 |
| <b>Prestw-1043</b> | 14A04 | Penbutolol sulfate          | 1.05 | 0.83 |
| <b>Prestw-1044</b> | 14A05 | Prednicarbate               | 1.05 | 0.81 |
| <b>Prestw-1045</b> | 14A06 | Sertaconazole nitrate       | 1.01 | 0.82 |
| <b>Prestw-1046</b> | 14A07 | Repaglinide                 | 1.00 | 0.95 |
| <b>Prestw-1047</b> | 14A08 | Piretanide                  | 0.97 | 0.94 |
| <b>Prestw-1048</b> | 14A09 | Piperacetazine              | 0.86 | 0.84 |
| <b>Prestw-1049</b> | 14A10 | Oxyphenbutazone             | 0.91 | 1.00 |
| <b>Prestw-1050</b> | 14A11 | Quinethazone                | 1.32 | 1.24 |
| <b>Prestw-1051</b> | 14B02 | Moricizine hydrochloride    | 0.96 | 0.93 |
| <b>Prestw-1052</b> | 14B03 | Iopanoic acid               | 1.00 | 0.76 |
| <b>Prestw-1053</b> | 14B04 | Pivmecillinam hydrochloride | 0.97 | 0.87 |
| <b>Prestw-1054</b> | 14B05 | Levopropoxyphene napsylate  | 0.92 | 0.90 |

|                    |       |                               |      |      |
|--------------------|-------|-------------------------------|------|------|
| <b>Prestw-1055</b> | 14B06 | Piperidolate hydrochloride    | 0.98 | 0.87 |
| <b>Prestw-1056</b> | 14B07 | Trifluridine                  | 0.96 | 0.92 |
| <b>Prestw-1057</b> | 14B08 | Oxprenolol hydrochloride      | 1.00 | 0.92 |
| <b>Prestw-1058</b> | 14B09 | Ondansetron Hydrochloride     | 0.96 | 0.91 |
| <b>Prestw-1059</b> | 14B10 | Propoxycaine hydrochloride    | 1.03 | 0.90 |
| <b>Prestw-1060</b> | 14B11 | Oxaprozin                     | 0.95 | 0.94 |
| <b>Prestw-1061</b> | 14C02 | Phensuximide                  | 1.02 | 0.84 |
| <b>Prestw-1062</b> | 14C03 | Ioxaglic acid                 | 1.07 | 1.10 |
| <b>Prestw-1063</b> | 14C04 | Naftifine hydrochloride       | 0.97 | 0.84 |
| <b>Prestw-1064</b> | 14C05 | Meprylcaine hydrochloride     | 0.90 | 0.94 |
| <b>Prestw-1065</b> | 14C06 | Milrinone                     | 0.97 | 0.99 |
| <b>Prestw-1066</b> | 14C07 | Methantheline bromide         | 1.00 | 0.91 |
| <b>Prestw-1067</b> | 14C08 | Ticarcillin sodium            | 0.96 | 1.02 |
| <b>Prestw-1068</b> | 14C09 | Thiethylperazine malate       | 1.05 | 0.57 |
| <b>Prestw-1069</b> | 14C10 | Mesalamine                    | 1.00 | 1.00 |
| <b>Prestw-1362</b> | 14C11 | Vorinostat                    | 1.04 | 1.00 |
| <b>Prestw-1071</b> | 14D02 | Imidurea                      | 0.89 | 0.96 |
| <b>Prestw-1072</b> | 14D03 | Lansoprazole                  | 0.94 | 0.90 |
| <b>Prestw-1073</b> | 14D04 | Bethanechol chloride          | 0.97 | 0.86 |
| <b>Prestw-1074</b> | 14D05 | Cyproterone acetate           | 1.01 | 0.95 |
| <b>Prestw-1075</b> | 14D06 | (R)-Propranolol hydrochloride | 0.95 | 1.08 |
| <b>Prestw-1076</b> | 14D07 | Ciprofibrate                  | 1.03 | 1.05 |
| <b>Prestw-1420</b> | 14D08 | Formestane                    | 0.98 | 0.97 |

|                    |       |                                 |      |      |
|--------------------|-------|---------------------------------|------|------|
| <b>Prestw-1078</b> | 14D09 | Benzylpenicillin sodium         | 0.94 | 0.97 |
| <b>Prestw-1079</b> | 14D10 | Chlorambucil                    | 0.94 | 1.14 |
| <b>Prestw-1080</b> | 14D11 | Methiazole                      | 0.95 | 1.06 |
| <b>Prestw-1081</b> | 14E02 | (S)-propranolol hydrochloride   | 0.93 | 1.06 |
| <b>Prestw-1082</b> | 14E03 | (-)-Eseroline fumarate salt     | 0.94 | 1.02 |
| <b>Prestw-1294</b> | 14E04 | Isosorbide mononitrate          | 0.94 | 1.03 |
| <b>Prestw-1084</b> | 14E05 | Leucomisine                     | 0.98 | 1.07 |
| <b>Prestw-1493</b> | 14E06 | Topiramate                      | 0.96 | 1.05 |
| <b>Prestw-1086</b> | 14E07 | D-cycloserine                   | 0.95 | 1.06 |
| <b>Prestw-1087</b> | 14E08 | 2-Chloropyrazine                | 1.02 | 1.07 |
| <b>Prestw-1088</b> | 14E09 | (+,-)-Synephrine                | 0.98 | 1.11 |
| <b>Prestw-1089</b> | 14E10 | (S)-(-)-Cycloserine             | 1.00 | 1.03 |
| <b>Prestw-1090</b> | 14E11 | Homosalate                      | 0.94 | 1.13 |
| <b>Prestw-1091</b> | 14F02 | Spaglumic acid                  | 0.95 | 1.10 |
| <b>Prestw-1092</b> | 14F03 | Ranolazine                      | 0.93 | 1.06 |
| <b>Prestw-1443</b> | 14F04 | Misoprostol                     | 0.94 | 1.18 |
| <b>Prestw-1094</b> | 14F05 | Sulfadoxine                     | 0.95 | 1.01 |
| <b>Prestw-1095</b> | 14F06 | Cyclopentolate hydrochloride    | 0.97 | 1.10 |
| <b>Prestw-1096</b> | 14F07 | Estriol                         | 0.94 | 1.10 |
| <b>Prestw-1097</b> | 14F08 | (-)-Isoproterenol hydrochloride | 0.95 | 1.13 |
| <b>Prestw-1339</b> | 14F09 | Sarafloxacin                    | 0.99 | 1.13 |
| <b>Prestw-1099</b> | 14F10 | Nialamide                       | 1.01 | 1.09 |
| <b>Prestw-1195</b> | 14F11 | Toltrazuril                     | 0.96 | 1.02 |

|                    |       |                            |      |      |
|--------------------|-------|----------------------------|------|------|
| <b>Prestw-1101</b> | 14G02 | Perindopril                | 0.88 | 1.08 |
| <b>Prestw-1102</b> | 14G03 | Fexofenadine HCl           | 0.90 | 0.99 |
| <b>Prestw-1202</b> | 14G04 | 4-aminosalicylic acid      | 0.90 | 1.15 |
| <b>Prestw-1104</b> | 14G05 | Clonixin Lysinate          | 0.96 | 1.04 |
| <b>Prestw-1105</b> | 14G06 | Verteporfin                | 0.84 | 1.12 |
| <b>Prestw-1106</b> | 14G07 | Meropenem                  | 0.95 | 0.92 |
| <b>Prestw-1107</b> | 14G08 | Ramipril                   | 0.92 | 1.03 |
| <b>Prestw-1108</b> | 14G09 | Mephénytoin                | 0.94 | 0.96 |
| <b>Prestw-1109</b> | 14G10 | Rifabutin                  | 0.89 | 0.84 |
| <b>Prestw-1110</b> | 14G11 | Parbendazole               | 0.89 | 1.09 |
| <b>Prestw-1111</b> | 14H02 | Mecamylamine hydrochloride | 0.92 | 0.81 |
| <b>Prestw-1112</b> | 14H03 | Procarbazine hydrochloride | 0.96 | 0.81 |
| <b>Prestw-1113</b> | 14H04 | Viomycin sulfate           | 0.87 | 0.85 |
| <b>Prestw-1114</b> | 14H05 | Saquinavir mesylate        | 0.92 | 0.78 |
| <b>Prestw-1115</b> | 14H06 | Ronidazole                 | 0.96 | 0.99 |
| <b>Prestw-1116</b> | 14H07 | Dorzolamide hydrochloride  | 0.89 | 1.14 |
| <b>Prestw-1117</b> | 14H08 | Azaperone                  | 0.96 | 1.22 |
| <b>Prestw-1118</b> | 14H09 | Cefepime hydrochloride     | 0.92 | 1.23 |
| <b>Prestw-1119</b> | 14H10 | Clocortolone pivalate      | 0.90 | 1.23 |
| <b>Prestw-1120</b> | 14H11 | Nadifloxacin               | 1.07 | 1.20 |
| <b>Plate 15</b>    |       |                            |      |      |
| <b>Prestw-1283</b> | 15A02 | Buspirone hydrochloride    | 1.07 | 0.90 |
| <b>Prestw-1222</b> | 15A03 | Anastrozole                | 1.36 | 1.09 |



|                    |       |                           |      |      |
|--------------------|-------|---------------------------|------|------|
| <b>Prestw-1399</b> | 15A04 | Doxycycline hydrochloride | 1.30 | 0.78 |
| <b>Prestw-1345</b> | 15A05 | Sulbactam                 | 1.11 | 0.85 |
| <b>Prestw-1414</b> | 15A06 | Fleroxacin                | 1.08 | 0.87 |
| <b>Prestw-1315</b> | 15A07 | Potassium clavulanate     | 1.04 | 1.08 |
| <b>Prestw-1482</b> | 15A08 | Valproic acid             | 1.08 | 1.16 |
| <b>Prestw-1280</b> | 15A09 | Mepivacaine hydrochloride | 1.06 | 1.06 |
| <b>Prestw-1478</b> | 15A10 | Rifaximin                 | 1.09 | 1.06 |
| <b>Prestw-1473</b> | 15A11 | Estradiol Valerate        | 1.01 | 1.16 |
| <b>Prestw-1206</b> | 15B02 | Acetylcysteine            | 1.03 | 0.86 |
| <b>Prestw-1435</b> | 15B03 | Melengestrol acetate      | 1.43 | 0.80 |
| <b>Prestw-1246</b> | 15B04 | Bromhexine hydrochloride  | 1.08 | 0.73 |
| <b>Prestw-1223</b> | 15B05 | Anethole-trithione        | 1.03 | 0.80 |
| <b>Prestw-1476</b> | 15B06 | Amcinonide                | 1.08 | 0.72 |
| <b>Prestw-1256</b> | 15B07 | Caffeine                  | 1.08 | 0.76 |
| <b>Prestw-1262</b> | 15B08 | Carvedilol                | 1.17 | 0.73 |
| <b>Prestw-1282</b> | 15B09 | Methenamine               | 1.06 | 0.99 |
| <b>Prestw-1308</b> | 15B10 | Phentermine hydrochloride | 1.11 | 0.98 |
| <b>Prestw-1394</b> | 15B11 | Diclazuril                | 1.12 | 0.92 |
| <b>Prestw-1249</b> | 15C02 | Famciclovir               | 1.09 | 0.84 |
| <b>Prestw-1398</b> | 15C03 | Dopamine hydrochloride    | 1.06 | 1.05 |
| <b>Prestw-1263</b> | 15C04 | Cefdinir                  | 1.04 | 0.78 |
| <b>Prestw-1261</b> | 15C05 | Carprofen                 | 1.13 | 0.91 |
| <b>Prestw-1371</b> | 15C06 | Celecoxib                 | 1.06 | 0.87 |

|                    |       |                           |      |      |
|--------------------|-------|---------------------------|------|------|
| <b>Prestw-1258</b> | 15C07 | Candesartan               | 1.04 | 0.83 |
| <b>Prestw-1483</b> | 15C08 | Fludarabine               | 1.03 | 0.90 |
| <b>Prestw-1484</b> | 15C09 | Cladribine                | 0.98 | 1.12 |
| <b>Prestw-1356</b> | 15C10 | Vardenafil                | 1.07 | 1.00 |
| <b>Prestw-1417</b> | 15C11 | Fluconazole               | 0.98 | 0.84 |
| <b>Prestw-1203</b> | 15D02 | 5-fluorouracil            | 1.01 | 0.95 |
| <b>Prestw-1487</b> | 15D03 | Mesna                     | 0.95 | 1.06 |
| <b>Prestw-1444</b> | 15D04 | Mitotane                  | 0.99 | 0.83 |
| <b>Prestw-1497</b> | 15D05 | Ambrisentan               | 0.93 | 0.95 |
| <b>Prestw-1479</b> | 15D06 | Triclosan                 | 1.06 | 0.91 |
| <b>Prestw-1401</b> | 15D07 | Enoxacin                  | 1.06 | 0.89 |
| <b>Prestw-1307</b> | 15D08 | Olopatadine hydrochloride | 1.08 | 0.85 |
| <b>Prestw-1187</b> | 15D09 | Granisetron               | 1.03 | 1.00 |
| <b>Prestw-1224</b> | 15D10 | Anthralin                 | 1.04 | 1.07 |
| <b>Prestw-1492</b> | 15D11 | Lamotrigine               | 0.99 | 0.76 |
| <b>Prestw-1383</b> | 15E02 | Clofibrate                | 0.93 | 1.09 |
| <b>Prestw-1481</b> | 15E03 | Cyclophosphamide          | 0.91 | 1.05 |
| <b>Prestw-1229</b> | 15E04 | Aripiprazole              | 1.03 | 1.01 |
| <b>Prestw-1405</b> | 15E05 | Ethinylestradiol          | 1.03 | 0.97 |
| <b>Prestw-1419</b> | 15E06 | Fluocinolone acetonide    | 0.93 | 0.90 |
| <b>Prestw-1343</b> | 15E07 | Sparfloxacin              | 0.95 | 0.90 |
| <b>Prestw-1390</b> | 15E08 | Desloratadine             | 0.98 | 0.51 |
| <b>Prestw-1378</b> | 15E09 | Clarithromycin            | 0.92 | 0.94 |

|                    |       |                              |      |      |
|--------------------|-------|------------------------------|------|------|
| <b>Prestw-1199</b> | 15E10 | Tripelennamine hydrochloride | 0.98 | 0.92 |
| <b>Prestw-1352</b> | 15E11 | Tulobuterol                  | 1.05 | 1.00 |
| <b>Prestw-1196</b> | 15F02 | Topotecan                    | 0.99 | 1.09 |
| <b>Prestw-1232</b> | 15F03 | Atorvastatin                 | 1.01 | 1.03 |
| <b>Prestw-1234</b> | 15F04 | Azithromycin                 | 0.96 | 0.98 |
| <b>Prestw-1286</b> | 15F05 | Ibudilast                    | 0.92 | 0.94 |
| <b>Prestw-1433</b> | 15F06 | Losartan                     | 0.87 | 0.93 |
| <b>Prestw-1236</b> | 15F07 | Benztropine mesylate         | 0.91 | 0.61 |
| <b>Prestw-1359</b> | 15F08 | Vecuronium bromide           | 1.00 | 0.88 |
| <b>Prestw-1350</b> | 15F09 | Telmisartan                  | 1.05 | 1.02 |
| <b>Prestw-1490</b> | 15F10 | Nalmefene hydrochloride      | 0.97 | 0.85 |
| <b>Prestw-1241</b> | 15F11 | Bifonazole                   | 0.85 | 0.87 |
| <b>Prestw-1265</b> | 15G02 | Gatifloxacin                 | 0.95 | 0.99 |
| <b>Prestw-1244</b> | 15G03 | Bosentan                     | 1.07 | 0.93 |
| <b>Prestw-1266</b> | 15G04 | Gemcitabine                  | 0.79 | 0.84 |
| <b>Prestw-1190</b> | 15G05 | Olmesartan                   | 0.84 | 0.59 |
| <b>Prestw-1480</b> | 15G06 | Racepinephrine HCl           | 0.91 | 0.94 |
| <b>Prestw-1189</b> | 15G07 | Montelukast                  | 0.95 | 1.02 |
| <b>Prestw-1180</b> | 15G08 | Docetaxel                    | 0.94 | 0.91 |
| <b>Prestw-1376</b> | 15G09 | Cilnidipine                  | 0.96 | 0.97 |
| <b>Prestw-1291</b> | 15G10 | Imiquimod                    | 0.97 | 1.00 |
| <b>Prestw-1423</b> | 15G11 | Fosinopril                   | 0.87 | 0.97 |
| <b>Prestw-1290</b> | 15H02 | Imatinib                     | 0.90 | 0.72 |

|                    |       |                      |      |      |
|--------------------|-------|----------------------|------|------|
| <b>Prestw-1446</b> | 15H03 | Moxifloxacin         | 0.89 | 0.70 |
| <b>Prestw-1421</b> | 15H04 | Formoterol fumarate  | 0.91 | 0.65 |
| <b>Prestw-1338</b> | 15H05 | Rufloxacin           | 0.94 | 0.77 |
| <b>Prestw-1319</b> | 15H06 | Pravastatin          | 0.99 | 0.82 |
| <b>Prestw-1337</b> | 15H07 | Rosiglitazone        | 0.90 | 0.98 |
| <b>Prestw-1334</b> | 15H08 | Rivastigmine         | 0.90 | 0.98 |
| <b>Prestw-1342</b> | 15H09 | Sildenafil           | 0.92 | 1.03 |
| <b>Prestw-1207</b> | 15H10 | Acetylsalicylic acid | 0.88 | 0.99 |
| <b>Prestw-1472</b> | 15H11 | Hexachlorophene      | 0.95 | 0.99 |

**Supplemental Table 2. Compounds of the Prestwick Chemical Library excluded from analysis.** Compounds that had a fold-change  $\geq 1.3$  in the K562-NL alone condition were excluded from analysis as these drugs cytotoxic to K562-NL cells in absence of NK92 cells.

| <b>Prestw number</b> | <b>Plate # /<br/>Well position</b> | <b>Chemical name</b>            | <b>average fold-<br/>change</b> |
|----------------------|------------------------------------|---------------------------------|---------------------------------|
| <b>Prestw-349</b>    | 05C10                              | Ritodrine<br>hydrochloride      | 1.69                            |
| <b>Prestw-369</b>    | 05E10                              | Meloxicam                       | 1.50                            |
| <b>Prestw-339</b>    | 05B10                              | Guanfacine<br>hydrochloride     | 1.44                            |
| <b>Prestw-925</b>    | 12E06                              | Thonzonium bromide              | 1.36                            |
| <b>Prestw-143</b>    | 02G04                              | Chlorhexidine                   | 1.36                            |
| <b>Prestw-1152</b>   | 05F10                              | Nefazodone HCl                  | 1.34                            |
| <b>Prestw-1435</b>   | 15B03                              | Melengestrol acetate            | 1.43                            |
| <b>Prestw-705</b>    | 09G06                              | Methyl benzethonium<br>chloride | 1.32                            |
| <b>Prestw-1050</b>   | 14A11                              | Quinethazone                    | 1.32                            |
| <b>Prestw-1399</b>   | 15A04                              | Doxycycline<br>hydrochloride    | 1.30                            |
| <b>Prestw-777</b>    | 10F08                              | Alexidine<br>dihydrochloride    | 16.01                           |
| <b>Prestw-1222</b>   | 15A03                              | Anastrozole                     | 1.36                            |

**Supplemental Table 3. Z' factor for individual assay plates from the screening of the Prestwick Chemical Library.** Z' factor was calculated using the positive and negative control luminescent values from each plate.

| <b>Plate #</b> | <b>K562-NL alone</b> | <b>1:1 E:T</b> |
|----------------|----------------------|----------------|
| <b>1</b>       | 0.84                 | 0.64           |
| <b>2</b>       | 0.67                 | 0.52           |
| <b>3</b>       | 0.63                 | 0.20           |
| <b>4</b>       | 0.75                 | 0.43           |
| <b>5</b>       | 0.66                 | 0.50           |
| <b>6</b>       | 0.64                 | 0.56           |
| <b>7</b>       | 0.74                 | 0.80           |
| <b>8</b>       | 0.73                 | 0.28           |
| <b>9</b>       | 0.75                 | 0.54           |
| <b>10</b>      | 0.81                 | 0.55           |
| <b>11</b>      | 0.80                 | 0.56           |
| <b>12</b>      | 0.79                 | 0.68           |
| <b>13</b>      | 0.77                 | 0.51           |
| <b>14</b>      | 0.74                 | -0.06          |
| <b>15</b>      | 0.50                 | 0.06           |
| <b>Average</b> | 0.72                 | 0.44           |
